# Supplementary material for: Precocious cell differentiation occurs in proliferating cells in leaf primordia in Arabidopsis angustifolia3 mutant
Source: Front Plant Sci. 2024 Apr 16;15:1322223. doi: 10.3389/fpls.2024.1322223 (PMC11058843; doi:10.3389/fpls.2024.1322223)
Supplement: Supplementary file 2 [file Table_1.xlsx]

## Sheet: TableS1
Table S1:	Gene expression levels in WT and an3 5 DAS leaf primordia and differentially expressed genes (DEGs, q.value (FDR) < 0.05) in an3. Normalized counts are shown. In both WT and an3, a to c indicate replicates.
GeneID	Gene name	WT_a	WT_b	WT_c	an3_a	an3_b	an3_c	p.value	q.value	estimatedDEG
AT5G28640	AN3	1298.71	1257.23	1169.22	0	0	0	1.82854e-198	6.26495e-194	1
AT3G30720	QQS	10.8484	1.89341	1.57154	761.727	734.852	1255.88	7.99793e-93	1.37012e-88	1
AT1G20850	XCP2	13.948	11.3605	2.35731	344.677	288.987	383.594	9.74484e-63	1.11293e-58	1
AT5G24240	NA	9.29865	1.89341	4.71461	180.028	175.456	190.221	1.39043e-50	1.19097e-46	1
AT5G51890	NA	4.64933	3.78682	0	198.121	158.943	157.641	5.76183e-50	3.94824e-46	1
AT5G03260	LAC11	0	0	0	94.9898	108.37	87.2282	5.45981e-43	3.11773e-39	1
AT2G38080	IRX12	3.09955	7.57365	0	142.937	142.429	128.215	2.38753e-41	1.1686e-37	1
AT1G02335	GL22	0	0	0	70.5638	60.8936	69.3622	2.2226e-35	8.77612e-32	1
AT3G16660	NA	7.74888	10.4138	0	164.649	137.269	147.132	2.30533e-35	8.77612e-32	1
AT1G32100	PRR1	0	1.89341	0	127.558	73.2787	112.451	4.4715e-35	1.53202e-31	1
AT4G35350	XCP1	1.54978	5.68024	0.785769	155.602	112.498	98.7886	1.54522e-33	4.81295e-30	1
AT1G74670	GASA6	40.2942	24.6144	27.5019	208.977	295.179	286.907	9.81744e-32	2.80304e-28	1
AT5G07080	NA	3.09955	0	0	73.2778	68.1183	95.6358	5.36578e-31	1.41417e-27	1
AT1G04800	NA	268.111	196.915	157.154	1154.35	921.661	1141.32	5.73552e-30	1.40365e-26	1
AT3G05730	NA	1280.11	1299.83	929.565	4862.57	4338.93	4921.56	3.22118e-29	7.3576e-26	1
AT5G14740	CA2	1208.83	995.935	804.627	3558.04	4461.75	4731.34	5.283e-27	1.13129e-23	1
AT1G43790	TED6	0	0.946706	0	43.4239	68.1183	66.2094	7.1503e-27	1.44108e-23	1
AT1G15210	ABCG35	130.181	107.924	169.726	6.33265	11.353	14.7132	7.69735e-26	1.46515e-22	1
AT5G60020	LAC17	4.64933	0	0.785769	103.132	123.851	60.9547	1.05808e-25	1.908e-22	1
AT4G36540	BEE2	79.0386	69.1095	62.8615	284.065	281.762	314.232	2.14177e-24	3.66907e-21	1
AT3G23050	IAA7	65.0906	68.1628	71.505	258.734	294.147	294.264	2.86333e-24	4.67159e-21	1
AT5G48920	TED7	0	2.84012	0	43.4239	59.8615	69.3622	7.22005e-24	1.12442e-20	1
AT1G68520	BBX14	319.254	361.642	302.521	1141.69	1082.67	1658.39	1.1663e-23	1.73738e-20	1
AT5G44030	CESA4	12.3982	13.2539	4.71461	97.7037	109.402	131.368	1.8747e-23	2.67629e-20	1
AT5G28630	NA	57.3417	47.3353	33.0023	0	0	0	3.72913e-23	5.1107e-20	1
AT3G21550	DMP2	1.54978	0	0	47.0425	58.8294	37.8339	1.00655e-22	1.3264e-19	1
AT4G32540	YUC1	75.939	50.1754	42.4315	0	2.06419	1.05094	6.72574e-22	8.53472e-19	1
AT5G01930	MAN6	0	0	6.28615	52.4705	55.7331	63.0566	7.86002e-22	9.61785e-19	1
AT1G70410	BCA4	203.021	213.009	168.155	569.034	619.257	607.445	7.32105e-21	8.64944e-18	1
AT2G34790	MEE23	0	0.946706	0.785769	36.1866	34.0591	40.9868	2.55222e-20	2.9148e-17	1
AT3G16920	CTL2	4.64933	0	0	43.4239	41.2838	58.8528	1.3764e-19	1.52124e-16	1
AT3G22142	NA	58.8915	87.097	55.0038	244.259	465.475	415.122	1.51527e-19	1.62238e-16	1
AT1G33811	NA	162.726	139.166	110.793	426.097	498.502	438.243	1.97808e-19	2.05373e-16	1
AT1G66970	SVL2	251.064	236.677	169.726	632.36	807.098	891.199	2.26772e-19	2.28519e-16	1
AT4G16990	RLM3	460.283	479.033	462.818	1123.59	1342.76	1437.69	3.47343e-19	3.40019e-16	1
AT4G24120	YSL1	66.6404	69.1095	71.505	232.499	254.927	331.047	4.25401e-19	4.04864e-16	1
AT1G26945	KDR	15.4978	29.3479	20.43	121.225	133.14	113.502	2.05525e-18	1.90316e-15	1
AT3G16670	NA	3.09955	0	0	56.9939	50.5726	30.4773	7.49435e-18	6.75714e-15	1
AT5G66940	NA	201.471	266.024	330.023	74.1825	61.9257	53.5981	2.16783e-17	1.90447e-14	1
AT1G05010	EFE	855.476	768.725	708.763	1948.65	2085.86	1903.26	2.5187e-17	2.1574e-14	1
AT3G62160	NA	0	2.84012	1.57154	37.9959	31.9949	32.5792	5.30061e-17	4.4295e-14	1
AT3G01500	CA1	1472.29	1910.45	1454.46	3998.62	7527.07	6344.54	8.86386e-17	7.2308e-14	1
AT2G28790	NA	2378.91	2807.93	2382.45	1097.36	867.992	809.226	1.05775e-16	8.42809e-14	1
AT1G52400	BGLU18	4562.54	4474.13	5447.74	1952.27	1997.1	1819.18	1.09857e-16	8.55437e-14	1
AT2G02950	PKS1	35.6448	36.9215	26.7161	148.365	123.851	170.253	3.60893e-16	2.74776e-13	1
AT1G22690	NA	1.54978	0.946706	0	27.1399	28.8987	38.8849	6.15264e-16	4.58265e-13	1
AT1G80440	NA	154.978	133.486	159.511	503.898	503.662	1049.89	7.56257e-16	5.51295e-13	1
AT3G55990	ESK1	3.09955	1.89341	0	40.7099	26.8345	44.1396	1.16217e-15	8.14905e-13	1
AT5G55930	OPT1	77.4888	58.6958	58.1469	253.306	213.644	400.409	1.16544e-15	8.14905e-13	1
AT3G17070	NA	6.1991	10.4138	16.5011	79.6105	66.0541	74.6169	1.58888e-15	1.08876e-12	1
AT3G16240	DELTA-TIP	1459.89	1318.76	1445.03	3235.98	3997.3	5600.47	1.82701e-15	1.22739e-12	1
AT2G04160	AIR3	145.679	127.805	84.863	363.675	518.112	379.39	2.52265e-15	1.63078e-12	1
AT4G20260	PCAP1	159.627	124.965	124.151	409.813	339.559	396.205	2.4971e-15	1.63078e-12	1
AT4G37410	CYP81F4	29.4457	27.4545	41.6457	2.71399	2.06419	0	3.84306e-15	2.39402e-12	1
AT5G64870	NA	181.324	192.181	150.868	45.2332	53.6689	48.3434	3.82667e-15	2.39402e-12	1
AT4G04570	CRK40	18.5973	16.9839	18.0727	77.8011	99.0811	82.9929	8.83395e-15	5.4048e-12	1
AT5G25460	DGR2	435.487	375.842	278.162	1250.25	970.169	937.441	1.08036e-14	6.49394e-12	1
AT2G43590	NA	7.74888	10.4138	5.50038	51.5659	55.7331	58.8528	1.25549e-14	7.41649e-12	1
AT4G37390	BRU6	520.725	496.074	533.537	225.261	169.264	129.266	1.34326e-14	7.80045e-12	1
AT4G12470	AZI1	3.09955	5.68024	2.35731	53.3752	35.0912	38.8849	2.17506e-14	1.22167e-11	1
AT4G19810	ChiC	21.6969	15.1473	4.71461	107.655	83.5997	118.757	2.16217e-14	1.22167e-11	1
AT1G52030	MBP2	105.385	107.924	98.2211	30.7586	20.6419	22.0698	2.7152e-14	1.50045e-11	1
AT1G72610	GER1	3603.23	3759.37	2503.46	8492.08	8116.39	10550.4	3.67278e-14	1.9662e-11	1
AT5G04200	MC9	0	0	1.57154	22.6166	34.0591	23.1207	3.63044e-14	1.9662e-11	1
AT1G58370	RXF12	1.54978	6.62694	1.57154	37.0912	57.7973	94.5848	6.31608e-14	3.32925e-11	1
AT1G12110	NRT1.1	24.7964	22.7209	16.5011	95.8944	115.595	84.0754	6.85933e-14	3.54102e-11	1
AT4G23300	CRK22	35.3504	52.0688	19.6442	170.873	159.469	209.684	6.92453e-14	3.54102e-11	1
AT4G00780	NA	1.54978	0	0	25.3306	20.6419	27.3245	7.25582e-14	3.65587e-11	1
AT5G46240	KAT1	6.1991	10.4138	13.3581	83.2291	90.8243	50.4452	8.10908e-14	4.02657e-11	1
AT4G08160	NA	0	0	0	22.6166	18.5777	17.866	8.71928e-14	4.26771e-11	1
AT2G44260	NA	1.54978	0	0	20.8073	27.8666	23.1207	1.21751e-13	5.87527e-11	1
AT5G62680	GTR2	128.631	139.166	84.863	355.533	328.206	512.86	1.31957e-13	6.2793e-11	1
AT4G25240	SKS1	540.872	613.466	722.122	243.355	276.601	203.883	1.53748e-13	7.21603e-11	1
AT1G09890	NA	0	0	0	17.1886	23.7382	16.8151	2.41716e-13	1.11915e-10	1
AT1G58070	NA	3.09955	3.78682	0	52.4705	25.8024	39.9358	2.82025e-13	1.27141e-10	1
AT2G39310	JAL22	125.532	169.46	186.227	431.525	497.47	381.492	2.80971e-13	1.27141e-10	1
AT2G38320	TBL34	0	6.62694	0	49.7565	29.9308	42.0377	3.13198e-13	1.39361e-10	1
AT3G19850	NA	32.5453	34.0814	25.1446	120.32	108.37	171.304	3.19589e-13	1.40381e-10	1
AT1G73620	NA	691.2	793.34	846.273	365.484	332.335	281.653	5.2655e-13	2.28363e-10	1
AT2G32800	AP4.3A	94.5363	83.3101	68.3619	229.785	226.029	229.105	7.28623e-13	3.12051e-10	1
AT1G52040	MBP1	303.756	267.918	327.666	132.081	93.9206	83.0245	8.87199e-13	3.75274e-10	1
AT2G23170	GH3.3	595.114	639.027	904.42	291.302	271.441	211.239	9.1771e-13	3.83446e-10	1
AT2G34430	LHB1B1	6463.8	3312.66	5191.9	14046	15331.2	24810.5	1.41703e-12	5.84945e-10	1
AT5G25840	NA	6.1991	5.68024	5.50038	33.4726	47.4764	48.3434	1.44347e-12	5.88765e-10	1
AT1G33240	GTL1	351.799	352.175	308.807	684.831	767.879	824.99	1.87563e-12	7.56032e-10	1
AT1G17380	JAZ5	106.935	76.6832	111.579	21.7119	25.8024	24.1717	2.42579e-12	9.66423e-10	1
AT2G45180	NA	1903.12	2074.23	1524.39	4564.03	4067.49	6944.63	2.64958e-12	1.04345e-09	1
AT3G14170	NA	1.54978	0	2.35731	19.9026	29.9308	26.2736	2.86691e-12	1.11621e-09	1
AT5G55450	NA	61.991	76.6832	53.4323	266.876	161.007	233.309	3.555e-12	1.36856e-09	1
AT2G34650	PID	514.526	500.807	506.035	255.115	217.772	195.475	4.09932e-12	1.56057e-09	1
AT3G50440	MES10	7.74888	13.2539	8.64346	64.2312	44.3801	70.4132	4.95585e-12	1.86591e-09	1
AT1G49130	BBX17	32.5453	34.0814	21.2158	104.036	132.108	216.494	5.76848e-12	2.14826e-09	1
AT2G45480	GRF9	331.652	318.093	304.878	128.462	141.397	140.826	5.86213e-12	2.15966e-09	1
AT1G26820	RNS3	0	1.89341	1.57154	18.0933	26.8345	23.1207	6.64807e-12	2.42315e-09	1
AT2G34770	FAH1	350.249	339.867	283.663	130.272	77.4071	130.317	7.43462e-12	2.68131e-09	1
AT1G66140	ZFP4	20.1471	14.2006	16.5011	62.4218	73.2787	85.1263	8.11177e-12	2.87279e-09	1
AT3G54830	NA	34.0951	33.1347	24.3588	92.2758	122.819	121.909	8.13323e-12	2.87279e-09	1
AT2G16380	NA	3.09955	3.78682	0.785769	41.6146	21.674	48.3434	9.04862e-12	3.16351e-09	1
AT5G38410	RBCS3B	19055.3	17289.1	16922	33279.6	41373.3	38900.6	9.55501e-12	3.30681e-09	1
AT1G49750	NA	201.471	223.423	141.438	417.955	517.08	535.981	1.16037e-11	3.97566e-09	1
AT3G24340	CHR40	91.4368	70.0562	84.0773	17.1886	24.7703	19.9679	1.18555e-11	4.02172e-09	1
AT1G25230	NA	46.4933	33.1347	17.2869	132.986	138.301	228.055	1.34056e-11	4.50298e-09	1
AT3G56240	CCH	63.5408	47.3353	44.0031	162.84	144.493	154.489	2.16515e-11	7.20217e-09	1
AT5G65280	GCL1	74.3892	68.1628	69.9334	16.284	22.7061	10.5094	2.60772e-11	8.59094e-09	1
AT5G38420	RBCS2B	5265.91	4940.04	5055.86	9631.72	10156	11137.2	2.78929e-11	9.10159e-09	1
AT4G36670	PMT6	100.735	129.699	84.0773	338.344	258.024	583.273	2.94773e-11	9.52784e-09	1
AT4G24140	NA	3.09955	2.84012	0	26.2353	22.7061	26.2736	3.02665e-11	9.69149e-09	1
AT1G72930	TIR	50.8481	44.4952	34.1259	153.304	119.527	140.795	3.45178e-11	1.09504e-08	1
AT1G05310	NA	0	0.946706	0.785769	19.9026	14.4493	23.1207	5.90729e-11	1.85684e-08	1
AT1G24260	2023-09-03	7.74888	11.3605	5.50038	57.8985	46.4443	39.9358	6.50067e-11	2.02478e-08	1
AT2G44130	NA	41.8439	39.7617	41.6457	117.606	142.429	240.666	7.18009e-11	2.21625e-08	1
AT3G11000	NA	58.8915	78.5766	92.7207	15.3793	23.7382	12.6113	7.79858e-11	2.38567e-08	1
AT3G50270	NA	40.2942	47.3353	40.0742	126.653	139.333	114.553	8.64064e-11	2.61987e-08	1
AT1G73590	PIN1	635.408	844.462	876.918	354.628	380.843	281.653	1.10934e-10	3.30507e-08	1
AT5G40040	NA	13.948	14.2006	14.9296	0	0	0	1.10807e-10	3.30507e-08	1
AT1G74430	MYB95	179.774	166.62	214.515	80.5151	53.6689	45.1905	1.25694e-10	3.71252e-08	1
AT5G18430	NA	26.3462	26.5078	33.0023	97.7037	106.306	83.0245	1.40228e-10	4.10639e-08	1
AT2G43610	NA	40.2942	33.1347	31.4308	145.651	90.8243	131.368	1.42674e-10	4.14263e-08	1
AT1G68640	PAN	243.315	216.796	223.944	109.464	74.3108	72.515	1.62791e-10	4.68702e-08	1
AT1G25440	BBX15	571.867	761.152	668.689	1234.87	1512.02	1746.67	1.79554e-10	5.12656e-08	1
AT3G05900	NA	463.383	369.215	472.247	847.67	998.036	898.556	2.349e-10	6.65136e-08	1
AT2G35940	BLH1	103.835	86.1502	113.936	241.545	230.157	261.685	2.38413e-10	6.6955e-08	1
AT3G19930	STP4	156.527	138.219	99.7926	312.109	303.436	444.549	2.4908e-10	6.9382e-08	1
AT5G13180	NAC083	159.627	168.514	198.014	375.436	406.645	361.524	2.67469e-10	7.39035e-08	1
AT1G47990	GA2OX4	15.4978	22.7209	12.5723	0.904664	0	0	2.79239e-10	7.65383e-08	1
AT3G63300	FKD1	522.274	601.158	597.97	308.491	259.056	248.022	2.9293e-10	7.96537e-08	1
AT1G18620	TRM3	328.552	256.557	266.376	527.419	659.509	736.711	3.09997e-10	8.3631e-08	1
AT2G44300	NA	3.09955	10.4138	6.28615	38.9006	44.3801	34.6811	3.53274e-10	9.45616e-08	1
AT5G47220	ERF2	296.007	246.144	384.241	140.223	87.7281	74.6169	3.64859e-10	9.69053e-08	1
AT4G17340	TIP2;2	40.2942	17.9874	11.0008	113.083	108.37	205.985	3.80885e-10	1.00384e-07	1
AT5G26270	NA	0	0.946706	0.785769	20.8073	27.8666	11.5604	4.11742e-10	1.07688e-07	1
AT4G29150	IQD25	221.618	201.648	204.3	90.4664	66.0541	92.4829	4.32628e-10	1.12293e-07	1
AT3G25690	CHUP1	619.91	666.481	520.965	1123.59	1236.45	1501.8	4.86871e-10	1.25422e-07	1
AT3G45780	PHOT1	976.359	1230.72	903.634	1895.27	2467.74	2397.2	5.37728e-10	1.3749e-07	1
AT4G22690	CYP706A1	409.249	387.733	269.982	804.066	714.21	948.287	5.52416e-10	1.40199e-07	1
AT5G53930	NA	89.887	76.6832	83.2915	188.17	200.226	205.985	5.61777e-10	1.41527e-07	1
AT5G35940	NA	0	6.62694	7.07192	53.3752	50.5726	26.2736	5.88985e-10	1.47298e-07	1
AT4G24430	NA	1.54978	2.84012	0	22.6166	19.6098	21.0189	5.97199e-10	1.4827e-07	1
AT2G29290	NA	96.0861	72.8964	57.3611	181.838	206.419	241.717	6.28757e-10	1.54982e-07	1
AT4G18220	NA	49.5928	62.4826	51.8607	142.032	163.071	137.673	6.37973e-10	1.5613e-07	1
AT2G30930	NA	3.09955	7.57365	5.50038	55.1845	39.2196	26.2736	7.21015e-10	1.75202e-07	1
AT5G08370	AGAL2	46.4933	37.8682	41.6457	126.653	103.209	148.183	7.39403e-10	1.78404e-07	1
AT1G07440	NA	23.2466	16.094	10.215	64.2312	66.0541	65.1584	7.48743e-10	1.79395e-07	1
AT2G23600	ACL	20.1471	5.68024	10.215	60.6125	54.701	54.649	8.22725e-10	1.95751e-07	1
AT3G26220	CYP71B3	3.09955	6.62694	2.35731	43.4239	21.674	59.9037	9.58917e-10	2.26582e-07	1
AT1G02800	CEL2	94.5363	178.927	132.009	40.7099	43.348	31.5283	1.14056e-09	2.67657e-07	1
AT1G12260	NAC007	9.29865	0	0	33.4726	34.0591	26.2736	1.17725e-09	2.69435e-07	1
AT1G62380	ACO2	469.582	416.551	363.025	896.522	1099.18	748.271	1.17396e-09	2.69435e-07	1
AT2G05540	NA	125.532	52.0688	68.3619	373.626	239.446	998.395	1.15931e-09	2.69435e-07	1
AT5G19520	MSL9	32.5453	40.7084	50.2892	7.23731	8.25676	9.45848	1.17959e-09	2.69435e-07	1
AT1G52410	TSA1	336.301	297.266	380.312	158.316	150.686	163.947	1.26163e-09	2.86265e-07	1
AT4G18780	IRX1	13.948	14.2006	0	63.3265	77.4071	105.094	1.27293e-09	2.86928e-07	1
AT5G44020	NA	1537.38	1398.28	1360.17	2932.92	2760.85	4920.51	1.33896e-09	2.99841e-07	1
AT5G40450	NA	260.362	347.441	294.663	563.606	1027.97	1776.09	1.36545e-09	3.03786e-07	1
AT1G76890	GT2	105.385	94.6706	101.364	211.691	221.9	272.194	1.38672e-09	3.06529e-07	1
AT5G52450	NA	136.38	141.059	135.938	47.0425	61.9257	46.2415	1.45133e-09	3.18753e-07	1
AT5G61590	NA	418.439	436.431	294.663	1140.78	683.247	1070.91	1.52402e-09	3.32587e-07	1
AT4G18050	ABCB9	12.3982	9.46706	10.215	47.9472	45.4122	43.0886	1.55416e-09	3.37017e-07	1
AT3G12145	FLR1	765.589	639.973	740.98	363.675	364.329	246.972	1.59764e-09	3.44267e-07	1
AT3G05690	NF-YA2	77.4888	91.8305	122.58	34.3772	24.7703	27.3245	1.83171e-09	3.92238e-07	1
AT4G17245	NA	182.874	141.059	122.58	295.825	351.944	400.409	1.8575e-09	3.95289e-07	1
AT3G16850	NA	167.376	177.981	168.155	333.821	366.394	343.658	2.03252e-09	4.29865e-07	1
AT5G58620	NA	323.903	356.908	400.742	170.982	132.108	186.017	2.07022e-09	4.32499e-07	1
AT5G63160	BT1	66.6404	60.5892	64.433	220.738	170.296	650.533	2.06863e-09	4.32499e-07	1
AT2G39210	NA	24.7964	28.4012	33.7881	117.606	98.049	75.6679	2.21978e-09	4.60934e-07	1
AT4G38770	PRP4	2888.78	3366.49	2925.42	4981.99	7535.32	7503.73	2.27739e-09	4.70048e-07	1
AT3G07010	NA	119.333	140.112	108.436	283.16	248.735	284.805	2.42626e-09	4.97776e-07	1
AT4G23550	WRKY29	46.4933	67.2161	62.8615	204.454	133.14	167.1	2.62009e-09	5.34343e-07	1
AT4G29030	NA	5470.71	5705.8	7803.47	3141.9	3135.5	2277.39	3.05623e-09	6.17082e-07	1
AT5G12080	MSL10	649.356	669.321	783.412	369.103	368.458	283.754	3.06182e-09	6.17082e-07	1
AT4G10910	NA	18.5973	8.52035	15.7154	75.0871	46.4443	65.1584	3.33436e-09	6.66787e-07	1
AT5G19190	NA	247.964	300.106	317.451	598.888	812.259	532.828	3.34736e-09	6.66787e-07	1
AT1G35710	NA	6.1991	5.68024	3.14308	50.6612	34.0591	24.1717	3.42776e-09	6.78854e-07	1
AT4G30410	NA	4.64933	9.46706	9.42923	38.9006	37.1554	37.8339	3.56341e-09	7.01664e-07	1
AT5G46690	bHLH071	314.604	290.639	215.301	565.415	540.818	647.381	3.84732e-09	7.5324e-07	1
AT1G33720	CYP76C6	0	1.89341	2.35731	25.3306	21.674	12.6113	3.95245e-09	7.69424e-07	1
AT5G28610	NA	0	0.946706	0	31.6633	7.22466	25.2226	4.05338e-09	7.84615e-07	1
AT1G03870	FLA9	57.3417	47.3353	107.65	304.872	220.868	197.577	4.09922e-09	7.89031e-07	1
AT3G14210	ESM1	368.847	376.789	328.451	712.875	850.446	626.362	4.21205e-09	8.0622e-07	1
AT5G63180	NA	203.021	254.664	257.732	429.716	553.203	510.758	4.38645e-09	8.34935e-07	1
AT1G23390	NA	1115.84	1089.66	1192.8	1983.93	2095.15	2647.32	4.45731e-09	8.43736e-07	1
AT1G17990	NA	34.9629	24.9741	9.86926	103.322	93.5078	201.455	5.49454e-09	1.03436e-06	1
AT1G63820	NA	46.4933	64.376	39.2884	12.6653	9.28885	11.5604	5.6294e-09	1.04823e-06	1
AT5G54690	GAUT12	0	0	0	7.23731	13.4172	22.0698	5.60271e-09	1.04823e-06	1
AT2G29340	NA	46.4933	38.8149	30.645	126.653	91.8564	149.234	5.74826e-09	1.06458e-06	1
AT5G52882	NA	587.365	568.97	432.173	1182.4	977.394	1043.59	7.11037e-09	1.30976e-06	1
AT3G23560	ALF5	131.731	118.338	113.151	29.8539	48.5085	48.3434	7.15935e-09	1.31173e-06	1
AT3G59940	NA	302.206	313.36	371.669	602.506	632.674	843.907	7.61973e-09	1.38866e-06	1
AT1G21130	IGMT4	596.664	606.839	315.863	1482.71	1055.82	2470.69	8.33301e-09	1.51061e-06	1
AT3G44720	ADT4	689.65	679.735	636.473	397.148	291.051	318.436	9.24942e-09	1.66791e-06	1
AT2G35310	NA	151.878	126.859	170.512	63.3265	59.8615	39.9358	1.01474e-08	1.81479e-06	1
AT3G17100	NA	184.423	185.554	140.653	358.247	319.949	442.447	1.01699e-08	1.81479e-06	1
AT5G39220	NA	26.3462	49.2287	36.1454	3.61866	9.28885	6.30566	1.05837e-08	1.87885e-06	1
AT5G10140	FLC	46.4933	74.7898	51.8607	18.998	8.25676	11.5604	1.08814e-08	1.92175e-06	1
AT2G20670	NA	148.778	237.623	373.24	750.871	733.819	2127.11	1.10939e-08	1.94923e-06	1
AT1G02460	NA	3.09955	6.62694	3.14308	36.1866	19.6098	35.732	1.17782e-08	2.04844e-06	1
AT5G38610	NA	0	0	0.785769	18.998	13.4172	9.45848	1.1745e-08	2.04844e-06	1
AT4G30250	NA	58.8915	84.2568	110.793	27.1399	15.4814	24.1717	1.1868e-08	2.05364e-06	1
AT2G04570	NA	119.333	137.272	108.436	256.925	268.345	249.073	1.20951e-08	2.08242e-06	1
AT1G11190	BFN1	0	0	0	13.57	13.4172	7.3566	1.31421e-08	2.25138e-06	1
AT2G27740	NA	4.64933	0	3.92884	23.5213	20.6419	26.2736	1.39573e-08	2.37913e-06	1
AT1G19850	MP	1507.93	1638.75	1632.04	902.855	869.024	859.671	1.43574e-08	2.43522e-06	1
AT5G20740	NA	486.63	617.252	605.828	280.446	318.917	224.902	1.50985e-08	2.5483e-06	1
AT3G50740	UGT72E1	54.2422	40.7084	24.3588	137.509	105.274	143.979	1.5604e-08	2.62071e-06	1
AT3G59210	NA	24.7964	35.9748	33.0023	103.132	92.8885	78.8207	1.60393e-08	2.68067e-06	1
AT3G07870	NA	7.74888	9.46706	3.14308	40.7099	27.8666	62.0056	1.69379e-08	2.81713e-06	1
AT1G17420	LOX3	477.331	712.87	677.333	341.963	254.927	248.022	1.71987e-08	2.84431e-06	1
AT5G60720	NA	0	1.89341	0	26.2353	8.25676	21.0189	1.72674e-08	2.84431e-06	1
AT1G22900	NA	29.4457	21.7742	19.6442	78.7058	69.1504	67.2603	1.86799e-08	3.06225e-06	1
AT1G80180	NA	20.1471	15.1473	27.5019	75.9918	60.8936	112.451	1.91507e-08	3.10967e-06	1
AT3G50560	NA	27.896	17.0407	29.0734	82.3245	67.0862	101.941	1.91419e-08	3.10967e-06	1
AT1G22275	ZYP1b	57.3417	70.0562	38.5027	3.61866	16.5135	6.30566	1.94404e-08	3.14182e-06	1
AT3G51600	LTP5	999.605	618.199	749.623	1934.17	1381.98	2002.05	2.09293e-08	3.36657e-06	1
AT3G10080	NA	79.0386	72.8964	56.5754	162.84	169.264	158.692	2.14712e-08	3.4376e-06	1
AT4G25020	NA	61.991	57.7491	69.1477	19.9026	23.7382	14.7132	2.16771e-08	3.45442e-06	1
AT5G46730	NA	6.1991	11.3605	4.71461	41.6146	68.1183	29.4264	2.24342e-08	3.55853e-06	1
AT1G54790	NA	0	0.946706	1.57154	14.4746	13.4172	13.6623	2.38317e-08	3.76277e-06	1
AT1G72150	PATL1	894.221	990.254	806.199	1829.23	1506.86	2629.46	2.42497e-08	3.81121e-06	1
AT1G70760	NdhL	444.786	411.817	368.526	727.35	758.59	799.767	2.50204e-08	3.91438e-06	1
AT4G37900	NA	48.043	33.1347	47.9319	12.6653	9.28885	8.40754	2.63347e-08	4.10127e-06	1
AT4G00230	XSP1	51.1426	51.1221	40.0742	107.655	123.851	166.049	2.75745e-08	4.27493e-06	1
AT1G32700	NA	111.584	98.4574	105.293	236.117	202.291	227.004	3.05521e-08	4.71521e-06	1
AT5G60660	PIP2;4	0	0.946706	0.785769	11.7606	16.5135	13.6623	3.17726e-08	4.88159e-06	1
AT3G55500	EXPA16	20.1471	8.52035	8.64346	65.1358	41.2838	99.8395	3.21794e-08	4.92201e-06	1
AT1G17230	NA	15.4978	17.0407	19.6442	64.2312	46.4443	74.6169	3.2349e-08	4.92596e-06	1
AT4G39640	GGT1	97.6359	147.686	125.723	246.069	323.046	265.888	3.37596e-08	5.11802e-06	1
AT5G36790	NA	682.63	682.509	593.35	1179.6	1257.3	1133.13	3.41047e-08	5.14756e-06	1
AT1G28260	NA	23.2466	27.4545	11.7865	79.6105	82.5676	237.513	3.51382e-08	5.28028e-06	1
AT5G40020	NA	0	0	0	6.33265	14.4493	12.6113	3.62812e-08	5.42824e-06	1
AT5G47560	TDT	80.5883	51.1221	72.2907	138.414	194.034	198.628	4.15111e-08	6.18371e-06	1
AT1G62510	NA	74.3892	65.3227	57.3611	139.318	166.167	277.449	4.20618e-08	6.23862e-06	1
AT2G03090	EXPA15	764.039	791.446	642.759	424.288	367.426	274.296	4.24434e-08	6.26809e-06	1
AT4G37750	ANT	1529.63	1969.15	1671.33	982.465	919.597	691.52	4.29959e-08	6.32243e-06	1
AT1G59850	NA	0	0	0	6.33265	18.5777	10.5094	5.14864e-08	7.53858e-06	1
AT5G26000	TGG1	4297.53	5033.64	3965.78	6879.07	9903.98	10159.5	5.19907e-08	7.58003e-06	1
AT2G18300	HBI1	220.068	306.733	219.23	450.523	561.46	508.656	5.22543e-08	7.58618e-06	1
AT1G13110	CYP71B7	278.96	227.209	135.938	434.239	530.497	615.852	5.49617e-08	7.94556e-06	1
AT5G51800	NA	26.3462	33.1347	18.0727	2.71399	3.09628	5.25471	5.53543e-08	7.96869e-06	1
AT2G23200	NA	6.1991	10.4138	3.14308	40.7099	27.8666	33.6302	5.843e-08	8.37627e-06	1
AT5G64240	MC3	10.8484	6.62694	8.64346	28.9493	46.4443	40.9868	5.99202e-08	8.55411e-06	1
AT4G23600	CORI3	96.0861	96.564	66.0046	12.6653	30.9628	27.3245	6.49999e-08	9.24078e-06	1
AT3G48360	BT2	1122.04	1514.73	960.995	3448.58	1962.01	5349.3	6.909e-08	9.78166e-06	1
AT5G40030	NA	108.484	98.4574	105.293	41.6146	45.4122	40.9868	7.72337e-08	1.08896e-05	1
AT4G38840	NA	65.0906	74.7898	66.0046	133.89	173.392	253.277	7.97781e-08	1.12023e-05	1
AT2G38530	LTP2	1425.79	1485.38	966.496	712.875	410.774	312.13	8.47725e-08	1.1855e-05	1
AT5G14360	NA	0	0	0	9.04664	9.28885	11.5604	8.5194e-08	1.18655e-05	1
AT3G56060	NA	6.1991	12.3072	3.92884	37.9959	44.3801	28.3754	8.64449e-08	1.1991e-05	1
AT5G65510	AIL7	32.5453	33.1347	32.2165	8.14198	9.28885	6.30566	8.86913e-08	1.2253e-05	1
AT1G11410	NA	17.0475	26.5078	28.2877	69.6592	75.3429	67.2603	8.95003e-08	1.23151e-05	1
AT4G38420	sks9	18.5973	28.4012	21.2158	67.8498	125.916	66.2094	9.17805e-08	1.25783e-05	1
AT3G24535	NA	0	0	0	15.3793	7.22466	8.40754	9.2175e-08	1.25821e-05	1
AT5G14120	NA	344.05	264.131	243.588	678.498	531.529	1492.34	9.25884e-08	1.25883e-05	1
AT1G44760	NA	950.013	914.518	1155.87	525.61	501.598	596.935	9.51836e-08	1.28393e-05	1
AT5G24990	NA	203.021	219.636	224.659	83.2291	122.819	77.7698	9.51784e-08	1.28393e-05	1
AT2G39010	PIP2E	765.589	790.5	672.618	1279.2	1330.37	1350.46	9.73473e-08	1.30797e-05	1
AT5G50160	FRO8	127.082	180.821	110.008	249.687	369.49	369.932	1.00372e-07	1.34334e-05	1
AT3G19620	NA	3.09955	6.62694	0	16.284	57.7973	52.5471	1.11219e-07	1.48272e-05	1
AT1G13100	CYP71B29	23.2466	18.9341	14.9296	60.6125	59.8615	53.5981	1.13699e-07	1.50747e-05	1
AT4G36850	NA	46.4933	14.2006	37.7169	106.75	141.397	624.26	1.13956e-07	1.50747e-05	1
AT2G37170	PIP2B	213.869	163.496	229.971	346.016	497.036	426.84	1.20691e-07	1.59042e-05	1
AT1G23480	CSLA03	113.134	117.392	143.796	277.732	290.019	220.698	1.23593e-07	1.62243e-05	1
AT3G19370	NA	35.6448	45.4419	52.6465	142.937	143.461	90.3811	1.2477e-07	1.63163e-05	1
AT3G18890	Tic62	802.784	865.289	698.548	1189.63	1740.11	1797.11	1.30084e-07	1.69465e-05	1
AT1G75750	GASA1	9.29865	4.73353	5.50038	20.8073	47.4764	43.0886	1.31714e-07	1.70939e-05	1
AT1G13245	RTFL17	100.735	122.125	119.437	302.158	185.777	344.709	1.3369e-07	1.72848e-05	1
AT1G08810	MYB60	18.5973	17.0407	14.1438	48.8519	56.7652	50.4452	1.38483e-07	1.78372e-05	1
AT2G20870	NA	46.4933	83.3101	55.0038	132.081	168.231	194.424	1.47307e-07	1.89028e-05	1
AT2G15960	NA	179.774	160.94	72.2907	475.853	280.73	873.333	1.49736e-07	1.91428e-05	1
AT4G23290	CRK21	9.29865	0.946706	0	24.4259	56.7652	28.3754	1.61864e-07	2.06163e-05	1
AT1G17920	HDG12	373.496	416.551	289.163	183.647	184.745	172.355	1.6458e-07	2.08846e-05	1
AT1G79110	BRG2	63.5408	79.5233	57.3611	189.075	123.851	198.628	1.68174e-07	2.12619e-05	1
AT5G02090	NA	0	1.89341	0	9.04664	13.4172	18.917	1.6918e-07	2.13105e-05	1
AT2G34620	NA	429.288	320.933	436.102	703.829	801.938	728.303	1.78205e-07	2.23651e-05	1
AT1G68190	BBX27	275.86	229.103	298.592	438.762	539.786	563.305	1.81397e-07	2.26001e-05	1
AT4G37980	ELI3-1	241.765	177.981	153.225	343.772	494.373	395.154	1.81158e-07	2.26001e-05	1
AT5G65730	XTH6	339.401	307.679	357.525	562.701	650.22	605.343	1.88235e-07	2.33671e-05	1
AT4G15545	NA	630.759	555.716	546.109	1026.79	979.458	1035.18	1.94432e-07	2.40492e-05	1
AT1G72910	NA	23.5411	24.6144	24.8067	97.2876	50.7687	109.33	2.01479e-07	2.48312e-05	1
AT2G40610	EXPA8	17.0475	36.9215	30.645	84.1338	142.429	76.7188	2.17579e-07	2.6675e-05	1
AT5G48820	ICK6	204.57	227.209	204.3	121.225	87.7281	73.566	2.17997e-07	2.6675e-05	1
AT2G22990	SNG1	1439.74	1443.73	1268.23	2068.06	2769.11	3080.31	2.19756e-07	2.67946e-05	1
AT1G52190	NA	24.7964	44.4952	26.7161	93.1804	129.012	79.8716	2.2693e-07	2.75712e-05	1
AT3G11930	NA	12.3982	13.2539	6.28615	35.2819	41.2838	65.1584	2.32282e-07	2.78268e-05	1
AT3G49070	NA	0	0	0	9.04664	10.3209	8.40754	2.31987e-07	2.78268e-05	1
AT4G32280	IAA29	0	7.57365	8.64346	23.5213	36.1233	34.6811	2.31119e-07	2.78268e-05	1
AT5G10760	NA	4.64933	0.946706	0.785769	15.3793	28.8987	14.7132	2.30155e-07	2.78268e-05	1
AT1G55200	NA	429.288	461.993	481.676	256.02	202.291	273.245	2.36577e-07	2.82425e-05	1
AT5G01370	ACI1	288.258	270.758	357.525	161.935	147.59	159.743	2.42784e-07	2.88829e-05	1
AT5G54250	CNGC4	17.0475	27.4545	31.4308	75.9918	116.627	64.1075	2.60917e-07	3.09326e-05	1
AT5G61520	NA	37.1946	47.3353	41.6457	123.939	83.5997	171.304	2.69538e-07	3.18445e-05	1
AT1G15960	NRAMP6	3.09955	12.3072	3.92884	29.8539	28.8987	46.2415	2.74579e-07	3.22179e-05	1
AT2G29890	VLN1	767.139	787.659	850.202	397.148	448.961	498.147	2.74133e-07	3.22179e-05	1
AT4G26140	BGAL12	133.281	157.153	177.584	58.8032	61.9257	81.9735	2.8562e-07	3.3399e-05	1
AT1G63295	NA	0	0	0	11.7606	7.22466	8.40754	3.02173e-07	3.52144e-05	1
AT1G15740	NA	291.358	197.862	190.942	418.86	447.929	741.965	3.06076e-07	3.55484e-05	1
AT5G21960	NA	83.6879	60.5892	95.8638	28.9493	21.674	31.5283	3.28867e-07	3.80664e-05	1
AT5G17420	IRX3	29.4457	34.0814	9.42923	92.2758	80.5034	119.807	3.30982e-07	3.81821e-05	1
AT5G28030	DES1	6.1991	8.52035	0	47.9472	63.9899	21.0189	3.60374e-07	4.14334e-05	1
AT2G32100	OFP16	72.8395	80.47	83.2915	140.223	195.066	191.272	3.63486e-07	4.16513e-05	1
AT1G31690	NA	89.887	169.46	64.433	292.207	394.26	259.583	3.66778e-07	4.17494e-05	1
AT2G38810	HTA8	728.395	604.945	689.119	432.43	325.11	302.671	3.66741e-07	4.17494e-05	1
AT2G43010	PIF4	715.996	618.199	636.473	999.654	1234.39	1379.89	3.7312e-07	4.20521e-05	1
AT4G28310	NA	322.353	480.927	409.386	179.124	214.676	97.7377	3.71124e-07	4.20521e-05	1
AT5G48650	NA	57.3417	58.6958	57.3611	20.8073	21.674	19.9679	3.73029e-07	4.20521e-05	1
AT3G13980	NA	1.54978	1.89341	3.92884	18.998	25.8024	12.6113	3.80755e-07	4.27719e-05	1
AT5G65920	NA	283.609	324.72	304.093	171.886	171.328	133.47	3.8722e-07	4.3356e-05	1
AT1G15405	NA	14.4749	10.4138	5.1625	0	0	0	3.96056e-07	4.42009e-05	1
AT3G62020	GLP10	9.29865	17.9874	3.92884	57.8985	43.348	42.0377	4.00135e-07	4.45111e-05	1
AT3G01490	NA	261.912	203.542	212.943	501.184	387.036	404.613	4.21526e-07	4.67389e-05	1
AT5G23530	CXE18	547.071	496.074	605.042	338.344	267.313	293.213	4.2306e-07	4.67577e-05	1
AT3G57500	NA	60.4413	77.6299	61.29	28.0446	17.5456	24.1717	4.33068e-07	4.75569e-05	1
AT5G21105	NA	123.982	143.899	117.865	307.586	270.409	215.443	4.32066e-07	4.75569e-05	1
AT2G22680	WAVH1	94.5363	106.031	117.08	23.5213	51.6047	37.8339	4.40817e-07	4.82533e-05	1
AT1G80920	J8	1387.05	1321.6	1455.24	2419.98	2265.45	3932.63	4.50083e-07	4.91106e-05	1
AT1G75880	NA	0	0.946706	0	7.23731	23.7382	9.45848	4.56227e-07	4.9623e-05	1
AT3G50480	HR4	21.6969	15.1473	4.71461	61.5172	52.6368	133.47	4.73531e-07	5.10193e-05	1
AT4G19820	NA	4.64933	8.52035	3.14308	21.7119	26.8345	32.5792	4.72249e-07	5.10193e-05	1
AT5G57090	EIR1	77.4888	134.432	112.365	33.4726	44.3801	42.0377	4.70669e-07	5.10193e-05	1
AT4G34480	NA	123.982	109.818	123.366	211.691	240.478	244.87	4.86341e-07	5.22352e-05	1
AT2G27402	NA	72.8395	42.6018	121.794	222.547	341.623	196.526	4.9688e-07	5.32003e-05	1
AT5G14090	NA	0	0	0.785769	18.0933	4.12838	30.4773	5.03242e-07	5.37136e-05	1
AT1G11670	NA	296.007	315.253	302.521	180.028	168.231	134.521	5.40124e-07	5.74712e-05	1
AT1G32640	MYC2	3703.96	3197.03	2978.06	2147.67	1470.74	1667.85	6.03395e-07	6.40047e-05	1
AT3G47340	ASN1	207.67	75.7365	135.938	480.377	399.421	5488.02	6.0651e-07	6.41365e-05	1
AT5G46330	FLS2	66.6404	37.8682	22.7873	154.698	122.819	121.909	6.20422e-07	6.54058e-05	1
AT4G17350	NA	20.1471	18.9341	20.43	4.52332	2.06419	4.20377	6.26018e-07	6.57934e-05	1
AT5G45720	NA	66.6404	55.8557	71.505	21.7119	28.8987	13.6623	6.51598e-07	6.82724e-05	1
AT1G09610	GXM3	0	0	0	9.04664	8.25676	8.40754	6.54931e-07	6.84123e-05	1
AT4G18290	KAT2	35.6448	40.7084	36.1454	93.1804	117.659	77.7698	6.59083e-07	6.86368e-05	1
AT3G02500	NA	27.896	37.8682	32.2165	7.23731	3.09628	12.6113	6.64303e-07	6.89708e-05	1
AT3G57240	BG3	6.1991	3.78682	0.785769	20.8073	18.5777	26.2736	6.83746e-07	7.07749e-05	1
AT1G61190	NA	137.93	166.819	174.582	325.136	369.593	257.943	6.87986e-07	7.09994e-05	1
AT1G11850	NA	278.96	238.57	219.23	612.458	471.667	385.696	6.99287e-07	7.19489e-05	1
AT1G31320	LBD4	145.679	95.6173	88.0061	43.4239	43.348	34.6811	7.20133e-07	7.38719e-05	1
AT3G14660	CYP72A13	418.439	308.626	275.019	619.695	575.909	770.341	7.46073e-07	7.63044e-05	1
AT3G62820	NA	23.2466	24.6144	14.1438	47.9472	80.5034	72.515	7.52563e-07	7.6739e-05	1
AT1G62480	NA	2014.71	2123.46	2032	930.9	626.482	1308.42	8.00736e-07	8.1409e-05	1
AT1G03130	PSAD-2	4917.44	3898.54	4038.07	6855.55	7321.68	9173.68	8.04173e-07	8.15165e-05	1
AT5G61030	GR-RBP3	1363.8	1376.51	1661.9	927.281	745.172	528.624	8.26802e-07	8.35631e-05	1
AT1G71970	NA	23.2466	15.1473	38.5027	77.8011	75.3429	87.2282	8.37809e-07	8.44265e-05	1
AT5G26260	NA	1.54978	4.73353	5.50038	18.998	19.6098	27.3245	8.4197e-07	8.4597e-05	1
AT4G00360	CYP86A2	423.089	374.896	433.744	685.736	793.681	675.756	8.93764e-07	8.95385e-05	1
AT2G29730	UGT71D1	10.8484	19.8808	14.1438	36.1866	69.1504	60.9547	9.18189e-07	9.17172e-05	1
AT1G58180	BCA6	58.8915	38.8149	38.5027	137.509	90.8243	276.398	9.32582e-07	9.26908e-05	1
AT1G61890	NA	480.43	473.353	433.744	283.16	268.345	204.934	9.33346e-07	9.26908e-05	1
AT4G18170	WRKY28	32.5453	20.8275	14.9296	73.2778	55.7331	80.9226	9.3944e-07	9.30263e-05	1
AT3G47560	NA	168.926	139.166	168.94	297.635	281.762	296.366	9.58327e-07	9.46231e-05	1
AT1G67630	POLA2	413.79	594.531	460.461	258.734	288.987	201.781	1.00161e-06	9.8612e-05	1
AT3G27770	NA	237.116	162.833	127.295	350.105	338.527	476.077	1.00743e-06	9.89017e-05	1
AT3G03870	NA	58.8915	70.0562	60.5042	113.083	171.328	154.489	1.05992e-06	0.000103757	1
AT3G10740	ASD1	370.396	403.297	374.026	559.083	757.558	1054.1	1.0703e-06	0.000104475	1
AT5G15780	NA	925.216	928.719	989.283	1409.47	2041.48	1667.85	1.0915e-06	0.000106241	1
AT1G61660	NA	60.4413	36.9215	41.6457	93.1804	136.237	124.011	1.11501e-06	0.000108222	1
AT1G78460	NA	96.0861	57.7491	36.1454	181.838	143.461	396.205	1.12344e-06	0.000108733	1
AT1G62400	HT1	4.64933	4.73353	0	17.1886	16.5135	29.4264	1.16215e-06	0.000112162	1
AT4G35770	SEN1	265.012	154.313	212.158	719.208	405.613	6116.49	1.18799e-06	0.000114334	1
AT4G16190	NA	333.202	433.591	190.156	690.259	648.156	922.728	1.22831e-06	0.000117883	1
AT5G61270	PIF7	49.5928	59.6425	69.9334	103.132	174.424	188.119	1.24212e-06	0.000118875	1
AT3G63140	CSP41A	1703.2	1815.78	1584.11	2686.85	2821.75	3111.84	1.25914e-06	0.000120169	1
AT2G46220	NA	278.96	254.664	295.449	449.618	470.635	692.571	1.30174e-06	0.000123889	1
AT4G17970	ALMT12	1.54978	1.89341	1.57154	11.7606	21.674	12.6113	1.30582e-06	0.000123934	1
AT3G26125	CYP86C2	0	0	0	18.998	4.12838	8.40754	1.31079e-06	0.000124061	1
AT4G13575	NA	72.8395	49.2287	95.8638	131.176	254.927	216.494	1.35063e-06	0.00012713	1
AT4G31920	RR10	303.756	272.651	305.664	152.888	182.681	122.96	1.35039e-06	0.00012713	1
AT3G16470	JR1	1580.77	1360.42	1598.25	811.484	948.495	902.76	1.41179e-06	0.000132523	1
AT2G15050	LTP	91.4368	106.031	87.2203	167.363	193.002	222.8	1.43965e-06	0.000134769	1
AT3G48720	DCF	4.64933	5.68024	9.42923	21.7119	35.0912	30.4773	1.50348e-06	0.00014036	1
AT5G47910	RBOHD	370.396	431.698	541.395	275.018	206.419	218.596	1.60159e-06	0.000149113	1
AT1G23460	NA	27.896	38.8149	27.5019	75.0871	74.3108	85.1263	1.61246e-06	0.000149718	1
AT2G38120	AUX1	540.872	541.516	473.033	788.867	956.752	934.288	1.6219e-06	0.000150188	1
AT2G17550	TRM26	40.2942	43.5485	41.6457	89.5618	95.9848	177.609	1.66484e-06	0.000153748	1
AT5G59080	NA	18.5973	11.3605	14.9296	44.3286	61.9257	38.8849	1.69847e-06	0.000156432	1
AT1G18810	NA	9.29865	11.3605	10.215	37.9959	46.4443	27.3245	1.70781e-06	0.000156871	1
AT2G13360	AGT	3989.12	3023.78	3116.36	5509.41	5675.49	8514.74	1.72723e-06	0.000157809	1
AT2G44840	ERF13	819.831	747.898	745.695	529.229	348.848	357.32	1.72447e-06	0.000157809	1
AT1G34000	OHP2	471.132	422.231	425.101	716.494	708.017	829.194	1.73402e-06	0.000158008	1
AT5G05240	NA	286.709	363.535	333.166	178.219	196.098	125.062	1.77066e-06	0.000160918	1
AT2G39870	NA	1280.11	1574.37	1458.39	825.054	923.725	767.188	1.79434e-06	0.000162639	1
AT1G69160	NA	199.921	234.783	220.015	401.671	380.843	361.524	1.80155e-06	0.000162862	1
AT5G46830	NIG1	17.0475	22.7209	35.3596	2.71399	8.25676	2.10189	1.81175e-06	0.000163353	1
AT1G75380	BBD1	528.474	417.497	319.808	802.437	741.044	1584.82	1.85776e-06	0.000167062	1
AT2G48030	NA	54.2422	56.8024	59.7184	142.032	103.209	132.419	1.87839e-06	0.000168475	1
AT3G22310	PMH1	988.757	1218.41	1215.58	708.352	686.343	566.458	1.94634e-06	0.000174114	1
AT2G32150	NA	96.0861	95.6173	125.723	235.213	184.745	514.962	2.01189e-06	0.000179364	1
AT5G57350	HA3	66.6404	57.7491	38.5027	108.56	133.14	151.336	2.0155e-06	0.000179364	1
AT3G54630	NA	404.491	402.35	379.526	224.357	249.767	208.087	2.09066e-06	0.000185091	1
AT4G37925	NdhM	203.021	201.648	206.657	383.578	328.206	357.32	2.08571e-06	0.000185091	1
AT4G04460	NA	4.64933	2.84012	0	22.6166	12.3851	16.8151	2.09624e-06	0.000185106	1
AT2G29995	NA	4.64933	0.946706	3.92884	29.8539	14.4493	16.8151	2.17539e-06	0.000191602	1
AT1G76090	SMT3	440.136	449.685	445.531	790.677	773.039	682.062	2.18226e-06	0.000191714	1
AT1G04220	KCS2	60.4413	87.097	80.9342	26.2353	36.1233	14.7132	2.19003e-06	0.000191904	1
AT2G40260	NA	3.09955	7.57365	0.785769	18.998	22.7061	23.1207	2.30854e-06	0.000201511	1
AT5G50010	NA	74.3892	96.564	44.7888	24.4259	21.674	19.9679	2.31142e-06	0.000201511	1
AT1G26680	NA	32.5453	22.7209	43.2173	6.33265	9.28885	9.45848	2.32055e-06	0.000201793	1
AT4G37250	NA	255.713	192.181	208.229	417.955	345.752	427.734	2.44098e-06	0.000211729	1
AT3G17510	CIPK1	317.704	256.557	259.304	448.713	464.443	614.801	2.46566e-06	0.00021333	1
AT4G02290	GH9B13	438.587	559.503	518.607	271.399	311.693	284.805	2.47577e-06	0.000213546	1
AT5G01190	LAC10	3.09955	0	0	11.7606	9.28885	15.7641	2.48062e-06	0.000213546	1
AT4G23210	CRK13	3.39401	0	0.785769	21.8205	9.79458	13.1158	2.49086e-06	0.00021389	1
AT3G53720	CHX20	3.09955	8.52035	7.07192	18.0933	34.0591	45.1905	2.58834e-06	0.000221704	1
AT3G27920	MYB0	229.367	230.996	299.378	120.32	145.525	130.317	2.66117e-06	0.000227374	1
AT1G68570	NA	139.48	139.166	132.009	208.073	278.666	353.117	2.68147e-06	0.00022753	1
AT2G30010	TBL45	316.154	359.748	383.455	615.172	541.85	710.437	2.68292e-06	0.00022753	1
AT5G43530	NA	40.2942	77.6299	88.0061	22.6166	23.7382	9.45848	2.67781e-06	0.00022753	1
AT1G01430	TBL25	305.306	283.065	304.878	458.665	569.716	509.707	2.88636e-06	0.000244179	1
AT1G67090	RBCS1A	71274.2	64197.1	61605.1	99919.3	110927	115213	2.95384e-06	0.000249272	1
AT2G15695	NA	145.679	142.006	171.298	290.397	240.478	394.103	2.97102e-06	0.000250106	1
AT5G45820	CIPK20	34.0951	9.46706	19.6442	78.7058	76.375	57.8018	3.04809e-06	0.000255965	1
AT2G37090	IRX9	0	3.78682	0	13.57	15.4814	10.5094	3.10027e-06	0.00025971	1
AT5G43020	NA	1247.57	1354.74	1251.73	852.194	763.75	684.164	3.17642e-06	0.000265441	1
AT2G29670	NA	344.05	415.604	359.096	608.839	627.514	1146.58	3.21826e-06	0.000268282	1
AT5G52600	MYB82	6.1991	10.4138	10.215	0	1.03209	0	3.26114e-06	0.000271197	1
AT1G14280	PKS2	68.1901	25.5611	43.2173	102.227	136.237	156.59	3.27192e-06	0.000271435	1
AT1G12010	NA	0	1.89341	2.35731	8.14198	13.4172	22.0698	3.32946e-06	0.000275541	1
AT2G39690	NA	26.5012	47.3353	27.7141	85.0384	89.7923	82.7197	3.36954e-06	0.000278186	1
AT3G04730	IAA16	499.028	473.353	492.677	753.585	795.745	891.199	3.41136e-06	0.000280962	1
AT3G04910	WNK1	666.404	660.801	541.395	1017.75	1005.26	1127.66	3.53837e-06	0.000290723	1
AT1G11350	SD1-13	136.38	173.247	116.294	255.115	253.895	420.377	3.58819e-06	0.000293409	1
AT1G60010	NA	258.813	201.648	205.086	390.815	352.976	587.477	3.58035e-06	0.000293409	1
AT5G39860	PRE1	26.3462	8.52035	14.1438	63.3265	70.1825	40.9868	3.60231e-06	0.000293863	1
AT1G75280	NA	96.0861	76.6832	64.433	135.7	223.965	177.609	3.63349e-06	0.000295088	1
AT5G43470	RPP8	467.815	522.364	382.442	785.303	869.798	738.256	3.63455e-06	0.000295088	1
AT3G58120	BZIP61	164.276	164.727	106.865	462.283	356.073	215.443	3.75371e-06	0.000304042	1
AT1G11260	STP1	1346.76	1236.4	1226.59	2532.16	2061.09	7113.83	3.90246e-06	0.000315018	1
AT1G31935	NA	26.3462	31.2413	15.7154	58.8032	66.0541	75.6679	3.90761e-06	0.000315018	1
AT5G53550	YSL3	51.1426	36.9215	38.5027	123.034	74.3108	203.883	4.04605e-06	0.000325413	1
AT5G20960	AO1	9.29865	32.188	29.8592	74.1825	75.3429	68.3113	4.08771e-06	0.000327994	1
AT4G39770	TPPH	3.09955	0.946706	1.57154	17.1886	25.8024	8.40754	4.12387e-06	0.000330122	1
AT2G45170	ATG8E	187.523	179.874	176.012	289.493	320.982	569.611	4.28648e-06	0.000341959	1
AT3G24810	ICK3	49.5928	70.0562	51.8607	24.4259	22.7061	13.6623	4.3016e-06	0.000341959	1
AT5G48360	NA	1901.57	2395.17	2227.65	1243.01	1439.77	1144.48	4.30168e-06	0.000341959	1
AT4G25940	NA	6.1991	7.57365	2.35731	19.9026	21.674	36.783	4.36927e-06	0.000346528	1
AT5G04770	CAT6	151.878	113.605	105.293	246.069	211.579	503.401	4.4013e-06	0.000348262	1
AT1G03610	NA	285.159	222.476	253.803	436.048	396.324	523.369	4.52493e-06	0.000357219	1
AT4G31020	NA	103.835	72.8964	71.505	33.4726	26.8345	37.8339	4.62635e-06	0.000364387	1
AT3G59250	NA	0	0.946706	2.35731	11.7606	11.353	10.5094	4.82251e-06	0.000377726	1
AT3G62550	NA	44.9435	29.3479	14.9296	98.6084	69.1504	155.54	4.82878e-06	0.000377726	1
AT5G42650	AOS	640.057	569.917	675.761	301.253	436.576	260.634	4.82352e-06	0.000377726	1
AT5G62710	NA	585.815	618.199	655.331	321.156	426.255	326.843	4.88686e-06	0.000381397	1
AT1G03920	NA	0	3.78682	0.785769	14.4746	14.4493	11.5604	5.07861e-06	0.000393571	1
AT2G32710	NA	268.111	246.144	233.373	419.764	380.843	581.171	5.07309e-06	0.000393571	1
AT4G25260	NA	136.38	114.551	119.437	281.351	212.612	212.889	5.05751e-06	0.000393571	1
AT5G46450	NA	89.887	104.138	54.218	183.647	168.231	197.577	5.08878e-06	0.000393571	1
AT2G22470	AGP2	9.29865	0.946706	3.92884	29.8539	18.5777	22.0698	5.12562e-06	0.000395527	1
AT1G70290	TPS8	739.243	673.108	918.564	1210.44	1293.21	1709.88	5.35329e-06	0.000412167	1
AT2G44210	NA	288.258	261.291	209.015	398.957	446.897	511.809	5.39218e-06	0.000414231	1
AT5G41040	RWP1	7.74888	8.52035	4.71461	23.5213	29.9308	26.2736	5.42022e-06	0.000415453	1
AT3G59060	PIL6	561.019	535.836	638.044	815.103	1108.47	1095.08	5.55753e-06	0.000425027	1
AT2G24240	NA	24.7964	35.0281	21.2158	66.9452	60.8936	100.89	5.60425e-06	0.000427645	1
AT4G27510	NA	97.6359	86.1502	82.5057	28.9493	49.5406	24.1717	5.71214e-06	0.000434909	1
AT4G19530	NA	75.939	159.993	109.222	189.98	294.147	381.492	5.80557e-06	0.000441043	1
AT4G32980	ATH1	450.985	520.688	533.537	290.397	330.27	244.87	5.90267e-06	0.000447428	1
AT4G31805	NA	609.062	550.036	553.181	330.202	382.907	271.143	5.93145e-06	0.000448617	1
AT3G18000	XPL1	4212.29	4113.44	3433.81	1206.82	2021.87	431.937	6.11024e-06	0.000461121	1
AT4G24230	ACBP3	339.401	205.435	238.874	578.985	427.287	1654.18	6.23252e-06	0.000469315	1
AT1G23310	GGT1	4345.57	4289.52	4448.24	6373.36	7994.61	7033.96	6.263e-06	0.000470577	1
AT1G66910	NA	18.5973	9.46706	7.85769	39.4072	37.0006	35.732	6.42847e-06	0.000480643	1
AT5G40100	NA	0	0	0	10.856	7.22466	4.20377	6.43906e-06	0.000480643	1
AT5G44400	NA	17.0475	30.2946	25.1446	53.3752	106.306	65.1584	6.41452e-06	0.000480643	1
AT1G51660	MKK4	289.808	347.441	358.311	155.602	212.612	186.017	6.46852e-06	0.000481792	1
AT1G32080	LrgB	621.46	740.324	622.329	910.997	1366.49	1263.23	6.48547e-06	0.000482007	1
AT4G11890	ARCK1	0	0	0	14.4746	7.22466	3.15283	6.56049e-06	0.000486527	1
AT4G38690	NA	117.783	132.539	121.008	223.452	221.9	220.698	6.58196e-06	0.000487065	1
AT2G26690	NA	65.0906	67.2161	77.0053	120.32	231.189	147.132	6.64325e-06	0.000489618	1
AT4G00220	JLO	0	0	0	12.6653	4.12838	6.30566	6.64504e-06	0.000489618	1
AT4G28950	ROP9	162.726	199.755	214.515	104.941	105.274	67.2603	6.66125e-06	0.000489759	1
AT1G80830	NRAMP1	145.679	118.338	128.08	272.304	202.291	262.736	6.74249e-06	0.000493509	1
AT2G18280	TLP2	433.937	345.548	268.733	625.123	569.716	1045.69	6.75547e-06	0.000493509	1
AT5G22500	FAR1	299.107	348.388	381.884	170.982	229.125	157.641	6.73884e-06	0.000493509	1
AT3G55110	ABCG18	399.842	426.018	350.453	212.596	260.088	192.322	6.92472e-06	0.000504797	1
AT1G62660	NA	63.5408	54.9089	69.9334	102.227	163.071	161.845	6.99609e-06	0.000508917	1
AT3G48390	NA	7.74888	5.68024	11.0008	28.9493	28.8987	138.724	7.07954e-06	0.000513896	1
AT3G13600	NA	134.83	144.846	180.727	92.2758	49.5406	46.2415	7.57526e-06	0.000548718	1
AT5G56870	BGAL4	61.991	39.7617	28.2877	142.032	73.2787	567.509	7.66915e-06	0.000554347	1
AT3G16800	NA	0	0.946706	3.14308	12.6653	8.25676	17.866	7.71387e-06	0.000556406	1
AT4G26530	FBA5	131.731	177.034	41.6457	385.387	326.142	354.168	7.79865e-06	0.000561339	1
AT2G10940	NA	6135.56	7119.23	6023.7	10587.3	14048.9	9313.45	7.87324e-06	0.000563239	1
AT2G38800	NA	153.428	108.871	84.0773	204.454	252.863	259.583	7.87437e-06	0.000563239	1
AT4G01720	WRKY47	41.8439	34.0814	34.5738	102.227	76.375	75.6679	7.86025e-06	0.000563239	1
AT4G26200	ACS7	4.64933	1.89341	0.785769	26.2353	8.25676	21.0189	7.9716e-06	0.000569006	1
AT1G74150	NA	65.0906	62.4826	40.86	24.4259	19.6098	13.6623	8.07647e-06	0.000575294	1
AT1G11600	CYP77B1	1455.24	1723.95	1587.25	924.567	1014.55	1001.55	8.15084e-06	0.00057726	1
AT1G67910	NA	17.0475	6.62694	11.7865	51.5659	33.027	35.732	8.15463e-06	0.00057726	1
AT4G31820	ENP	587.365	588.851	500.535	1044.89	764.782	1425.08	8.14905e-06	0.00057726	1
AT5G35740	NA	23.2466	43.5485	41.6457	80.5151	104.242	84.0754	8.17283e-06	0.000577355	1
AT4G08850	NA	320.804	280.225	265.59	467.711	520.176	460.313	8.24093e-06	0.000579775	1
AT5G55180	NA	3122.8	3375.95	3572.11	2132.29	2206.62	1869.63	8.23842e-06	0.000579775	1
AT1G64970	G-TMT	559.469	536.782	783.412	262.353	419.031	277.449	8.26266e-06	0.000580113	1
AT2G19800	MIOX2	113.134	148.633	146.153	386.292	188.873	1895.9	8.4714e-06	0.000593137	1
AT3G16450	JAL33	271.211	295.372	370.883	548.227	552.171	509.707	8.48278e-06	0.000593137	1
AT3G44970	NA	20.1471	14.2006	29.0734	62.4218	68.1183	48.3434	8.62629e-06	0.000601943	1
AT5G38430	RBCS1B	2339.54	2683.47	2150.78	4442.42	4992.36	3274.46	8.72551e-06	0.000607629	1
AT1G24530	NA	148.778	121.178	102.15	257.829	190.938	441.396	9.52215e-06	0.000661761	1
AT2G44830	NA	630.759	674.055	633.33	412.527	390.132	395.154	9.75028e-06	0.000676229	1
AT4G14040	SBP2	499.028	405.19	403.885	621.504	840.125	1602.69	9.78955e-06	0.000676229	1
AT4G14550	IAA14	23.2466	30.2946	36.1454	61.5172	115.595	73.566	9.78605e-06	0.000676229	1
AT2G19090	NA	388.994	519.742	465.961	290.397	265.248	244.87	9.88028e-06	0.000681123	1
AT5G18650	NA	334.752	361.642	365.383	543.703	551.139	811.328	9.91876e-06	0.000682402	1
AT2G14960	GH3.1	10.8484	9.46706	21.2158	0.904664	3.09628	1.05094	1.00638e-05	0.000690994	1
AT5G11420	NA	542.422	516.901	528.037	786.153	963.977	841.805	1.02056e-05	0.00069933	1
AT3G53100	NA	9.29865	7.57365	8.64346	18.0933	48.5085	40.9868	1.02429e-05	0.000700482	1
AT4G33300	ADR1-L1	299.107	363.535	280.519	540.989	467.539	679.96	1.03048e-05	0.000703312	1
AT4G18390	TCP2	855.476	840.675	761.41	513.849	543.914	414.071	1.05607e-05	0.000719342	1
AT3G50950	ZAR1	258.813	309.573	219.23	530.133	417.998	442.447	1.06406e-05	0.000723347	1
AT1G79620	NA	4.64933	11.3605	4.71461	28.9493	47.4764	19.9679	1.08175e-05	0.000732469	1
AT5G47230	ERF5	708.248	711.923	739.408	517.468	260.088	302.671	1.08125e-05	0.000732469	1
AT3G25250	AGC2-1	4.64933	17.0407	18.8585	1.80933	2.06419	0	1.08665e-05	0.000734338	1
AT5G43190	NA	170.475	191.235	192.513	286.779	305.5	432.988	1.09383e-05	0.000737735	1
AT3G53960	NA	18.5973	18.9341	14.1438	35.2819	53.6689	63.0566	1.09983e-05	0.000740324	1
AT3G06750	NA	120.883	147.686	148.51	203.549	292.083	302.671	1.10382e-05	0.000741551	1
AT2G44230	NA	263.462	226.263	305.664	432.43	723.499	424.581	1.11258e-05	0.000745974	1
AT1G79700	WRI4	204.57	146.739	147.725	316.633	266.28	713.59	1.13253e-05	0.000757867	1
AT2G27770	NA	60.4413	45.4419	28.2877	108.56	118.691	95.6358	1.15919e-05	0.000774196	1
AT5G07280	EMS1	483.53	523.528	474.604	282.255	339.559	216.494	1.16279e-05	0.000775087	1
AT1G72120	NA	1.54978	2.84012	5.50038	22.6166	12.3851	18.917	1.17074e-05	0.000778872	1
AT4G04900	RIC10	0	0.946706	2.35731	9.95131	10.3209	11.5604	1.17401e-05	0.000779536	1
AT5G02020	SIS	34.0951	25.5611	40.86	64.2312	85.6639	100.89	1.18407e-05	0.000784691	1
AT1G54740	NA	26.3462	13.2539	25.9304	71.4685	45.4122	156.59	1.19024e-05	0.000787256	1
AT5G18490	NA	21.6969	19.8808	9.42923	47.0425	43.348	81.9735	1.19997e-05	0.000792165	1
AT3G51220	NA	1.54978	2.84012	0	20.8073	10.3209	10.5094	1.23952e-05	0.000816703	1
AT5G46110	APE2	4584.24	4055.69	4231.37	5870.37	7883.14	7641.4	1.24552e-05	0.000819078	1
AT2G45740	PEX11D	164.276	140.112	73.0765	278.637	227.061	375.187	1.2567e-05	0.00082485	1
AT4G30130	NA	185.973	200.702	262.447	98.6084	131.076	106.145	1.28526e-05	0.00084198	1
AT2G39400	NA	57.3417	44.4952	35.3596	93.1804	100.113	229.105	1.32405e-05	0.000865738	1
AT1G23090	AST91	226.267	247.09	187.013	321.156	398.389	588.528	1.39473e-05	0.000908485	1
AT4G05180	PSBQ-2	6995.69	5708.64	5505.1	9284.57	9661.44	10954	1.39317e-05	0.000908485	1
AT1G15175	NA	17.0475	30.2946	14.1438	70.5638	43.348	76.7188	1.39806e-05	0.000908923	1
AT1G69610	NA	69.7399	57.7491	61.29	20.8073	31.9949	26.2736	1.44403e-05	0.000937032	1
AT2G21080	NA	20.1471	13.2539	11.0008	36.1866	47.4764	40.9868	1.46538e-05	0.000949091	1
AT5G53370	PMEPCRF	65.0906	33.1347	53.4323	101.322	119.723	125.062	1.48225e-05	0.000958204	1
AT2G46820	PSI-P	3690.02	3208.39	3007.92	5067.93	5267.81	5523.75	1.48915e-05	0.000960854	1
AT5G41050	NA	71.2897	82.3634	103.721	156.507	159.975	191.272	1.52828e-05	0.000984247	1
AT5G18860	NSH3	41.8439	53.0155	47.9319	84.1338	107.338	118.757	1.54806e-05	0.000995116	1
AT5G61660	NA	0	0.946706	0.785769	8.14198	7.22466	13.6623	1.58618e-05	0.00101771	1
AT1G49500	NA	106.935	73.8431	147.725	267.781	181.649	280.602	1.64724e-05	0.00105491	1
AT5G51950	NA	29.4457	37.8682	41.6457	7.23731	10.3209	17.866	1.65157e-05	0.00105571	1
AT1G08920	ESL1	34.0951	30.2946	32.2165	66.9452	74.3108	70.4132	1.65834e-05	0.0010561	1
AT5G42720	NA	1166.98	1242.08	1388.45	727.35	884.505	547.541	1.65586e-05	0.0010561	1
AT1G20720	NA	257.263	343.654	322.165	167.363	195.066	108.247	1.67782e-05	0.00106652	1
AT1G65900	NA	184.423	227.209	183.084	369.103	312.725	334.2	1.70234e-05	0.0010801	1
AT1G28290	AGP31	4846.15	4991.98	5072.14	3629.51	2724.73	2314.18	1.7201e-05	0.00108839	1
AT1G74930	ORA47	638.508	616.306	643.545	461.379	316.853	316.334	1.72176e-05	0.00108839	1
AT5G03510	NA	0	4.73353	1.57154	15.3793	11.353	13.6623	1.75396e-05	0.0011067	1
AT1G56220	NA	1856.63	1274.27	1023.07	2733.9	2116.83	5264.17	1.76422e-05	0.00111113	1
AT1G55000	NA	145.679	115.498	127.295	259.639	188.873	297.417	1.795e-05	0.00112845	1
AT5G48450	sks3	251.064	256.557	284.448	161.03	164.103	129.266	1.8121e-05	0.00113711	1
AT5G44260	NA	1.54978	6.62694	3.14308	14.4746	16.5135	42.0377	1.86973e-05	0.00117113	1
AT5G36960	NA	6.1991	5.68024	7.85769	0	0	0	1.90984e-05	0.00119407	1
AT3G54050	HCEF1	2465.69	2268.31	2244.16	3355.4	3938.47	3734	1.91638e-05	0.00119597	1
AT2G25460	NA	216.969	203.542	269.519	152.888	78.4392	90.3811	1.94158e-05	0.00120293	1
AT5G17600	NA	34.0951	35.0281	16.5011	63.3265	73.2787	94.5848	1.93836e-05	0.00120293	1
AT5G44973	NA	0	0	0	11.7606	1.03209	24.1717	1.94045e-05	0.00120293	1
AT5G57340	NA	21.6969	20.8275	7.85769	81.4198	34.0591	72.515	1.93255e-05	0.00120293	1
AT1G55670	PSAG	10578.8	9337.36	8285.15	14025	14728	17558.1	1.95101e-05	0.0012066	1
AT5G23210	SCPL34	97.6359	135.379	115.508	208.073	189.905	286.907	1.96629e-05	0.00121385	1
AT1G21270	WAK2	24.7964	27.4545	19.6442	78.7058	48.5085	57.8018	1.99963e-05	0.00123003	1
AT4G16008	NA	3.09955	2.84012	0.785769	21.7119	14.4493	9.45848	1.99967e-05	0.00123003	1
AT1G26800	NA	43.3937	26.5078	29.0734	86.8478	59.8615	115.604	2.01552e-05	0.00123756	1
AT3G15460	NA	187.523	167.567	206.657	74.1825	119.723	50.4452	2.06961e-05	0.0012685	1
AT1G27290	NA	254.163	301.999	327.666	454.141	462.379	650.533	2.14823e-05	0.00131433	1
AT1G64060	RBOH F	12.3982	23.6677	11.7865	38.9006	79.4713	44.1396	2.22011e-05	0.00135589	1
AT5G39080	NA	252.613	239.517	259.304	412.527	453.09	368.881	2.24975e-05	0.00137155	1
AT3G47295	NA	105.385	74.7898	75.4338	127.558	194.034	248.022	2.28066e-05	0.00138792	1
AT2G33050	RLP26	142.579	142.006	129.652	208.073	276.601	249.073	2.28809e-05	0.00138998	1
AT1G03590	NA	362.648	359.748	367.74	560.892	542.882	665.247	2.30767e-05	0.00139939	1
AT3G13910	NA	18.5973	24.6144	22.0015	3.61866	6.19257	7.3566	2.34757e-05	0.00142107	1
AT4G18010	IP5PII	80.5883	100.351	77.0053	197.217	127.98	211.239	2.42411e-05	0.00146481	1
AT1G21060	NA	103.835	140.112	157.154	220.738	242.542	283.754	2.45999e-05	0.00148388	1
AT5G22920	NA	929.865	861.502	879.275	1698.05	1255.03	4734.5	2.47804e-05	0.00149214	1
AT2G41340	RPB5D	111.584	96.564	67.5761	192.693	148.622	241.717	2.49404e-05	0.00149914	1
AT1G12780	UGE1	111.584	79.5233	88.7919	194.503	143.461	436.141	2.51687e-05	0.00151021	1
AT5G62020	HSFB2A	384.344	384.363	433.744	284.065	219.836	190.221	2.53364e-05	0.00151762	1
AT5G44550	NA	3.09955	0	0	12.6653	9.28885	8.40754	2.54881e-05	0.00152404	1
AT1G16310	NA	0	0	0.785769	9.95131	8.25676	5.25471	2.60206e-05	0.00155317	1
AT1G04150	NA	35.6448	49.2287	36.9311	16.284	15.4814	14.7132	2.68779e-05	0.00160155	1
AT2G44740	CYCP4;1	6.1991	21.7742	12.5723	50.6612	42.3159	34.6811	2.69918e-05	0.00160554	1
AT5G18600	NA	1.54978	1.89341	2.35731	8.14198	12.3851	27.3245	2.7061e-05	0.00160687	1
AT5G21930	PAA2	660.204	533.942	583.04	902.855	878.313	1205.43	2.71991e-05	0.00161228	1
AT2G05760	NA	161.177	195.968	214.515	84.1338	124.883	76.7188	2.7515e-05	0.00162819	1
AT3G51000	NA	72.8395	31.2413	32.2165	114.892	99.0811	142.928	2.76966e-05	0.0016361	1
AT5G01360	TBL3	3.09955	0	0.785769	8.14198	13.4172	12.6113	2.82449e-05	0.00166562	1
AT5G49152	NA	22.6577	14.9012	8.68275	0	4.49993	2.10189	2.83823e-05	0.00167085	1
AT4G35900	FD	40.2942	26.5078	34.5738	13.57	10.3209	9.45848	2.85932e-05	0.00168038	1
AT2G25735	NA	13.948	9.46706	12.5723	51.5659	27.8666	32.5792	2.89045e-05	0.00169286	1
AT2G26180	IQD6	330.102	388.149	428.244	221.643	253.895	207.036	2.88566e-05	0.00169286	1
AT3G20100	CYP705A19	19.0157	29.3479	25.9304	57.8985	67.0862	51.4962	2.93683e-05	0.00171417	1
AT4G14480	NA	10.8484	8.52035	15.7154	35.2819	33.027	33.6302	2.93378e-05	0.00171417	1
AT1G68130	IDD14	38.7444	45.4419	24.3588	90.4664	81.5355	76.7188	3.01083e-05	0.00175437	1
AT2G18700	TPS11	844.628	624.826	784.197	996.94	1469.7	1486.03	3.03044e-05	0.0017628	1
AT1G45145	TRX5	1.54978	6.62694	5.50038	14.4746	19.6098	33.6302	3.0382e-05	0.00176432	1
AT5G15310	MYB16	322.353	256.557	220.015	422.478	444.833	488.688	3.05009e-05	0.00176823	1
AT2G01340	At17.1	13.948	9.46706	13.3581	40.7099	24.7703	74.6169	3.09078e-05	0.00178879	1
AT1G44900	MCM2	1091.04	1403.02	1284.73	630.551	854.575	366.779	3.12967e-05	0.0018052	1
AT3G15353	MT3	190.622	156.206	106.079	288.588	285.89	270.092	3.12941e-05	0.0018052	1
AT2G27050	EIL1	412.24	365.429	330.809	618.79	606.872	558.051	3.18129e-05	0.00183189	1
AT1G66150	TMK1	770.239	831.208	751.981	1186.92	1416.03	1144.48	3.19195e-05	0.00183495	1
AT1G61440	NA	13.948	10.4138	9.42923	0	2.06419	2.10189	3.25595e-05	0.00186741	1
AT2G29310	NA	100.735	96.564	67.5761	210.787	208.483	132.419	3.26743e-05	0.00186741	1
AT4G06536	NA	0	0	0	6.33265	6.19257	5.25471	3.26183e-05	0.00186741	1
AT5G19530	ACL5	413.79	388.149	337.881	587.127	604.808	630.566	3.27022e-05	0.00186741	1
AT1G69870	NRT1.7	1.54978	8.52035	7.85769	20.8073	47.4764	19.9679	3.30772e-05	0.00188567	1
AT1G12060	BAG5	13.948	16.094	29.0734	47.0425	49.5406	71.4641	3.32199e-05	0.00189066	1
AT3G56410	NA	86.7874	82.3634	56.5754	146.556	130.044	190.221	3.33388e-05	0.00189429	1
AT5G11070	NA	519.175	631.453	518.607	882.048	814.323	1008.9	3.44569e-05	0.00195457	1
AT1G06100	NA	564.118	525.422	587.755	298.539	392.196	338.404	3.45768e-05	0.00195813	1
AT5G09590	MTHSC70-2	1659.81	1594.25	1837.13	956.23	1244.71	898.556	3.46748e-05	0.00196044	1
AT1G28580	NA	221.618	179.874	161.083	339.249	332.335	286.907	3.49971e-05	0.00197012	1
AT2G28315	NA	6.1991	4.73353	0	22.6166	16.5135	14.7132	3.50184e-05	0.00197012	1
AT5G60760	NA	12.3982	21.7742	23.5731	4.52332	4.12838	6.30566	3.50158e-05	0.00197012	1
AT1G66620	NA	133.281	167.567	198.014	91.3711	92.8885	75.6679	3.50912e-05	0.00197031	1
AT1G80380	NA	824.481	805.647	817.2	1138.97	1252.96	1640.52	3.51943e-05	0.00197031	1
AT4G36230	NA	10.8484	11.3605	9.42923	22.6166	41.2838	35.732	3.51843e-05	0.00197031	1
AT4G04040	MEE51	336.301	328.507	306.45	446	532.561	733.558	3.55193e-05	0.00198526	1
AT1G75460	NA	199.921	212.062	235.731	309.395	471.667	357.32	3.58298e-05	0.00199697	1
AT3G48290	CYP71A24	0	0	0	3.61866	10.3209	5.25471	3.58455e-05	0.00199697	1
AT1G16520	NA	592.014	657.014	675.761	406.194	429.351	379.39	3.60252e-05	0.00200372	1
AT4G15480	UGT84A1	20.1471	16.094	26.7161	2.71399	9.28885	1.05094	3.80463e-05	0.00211271	1
AT1G12520	CCS	661.754	484.713	334.738	1194.16	763.75	955.307	3.88157e-05	0.00214501	1
AT3G55710	NA	26.3462	50.1754	33.0023	72.3731	119.723	83.0245	3.87759e-05	0.00214501	1
AT5G06850	FTIP1	6.1991	0	2.35731	14.4746	14.4493	14.7132	3.8728e-05	0.00214501	1
AT1G70890	MLP43	257.263	157.153	136.724	294.921	367.426	425.632	3.91154e-05	0.00215808	1
AT2G46760	GulLO6	4.64933	2.84012	0.785769	26.2353	14.4493	9.45848	3.93768e-05	0.00216206	1
AT2G48020	NA	110.034	84.2568	102.936	163.744	176.488	203.883	3.93195e-05	0.00216206	1
AT4G37430	CYP91A2	92.9865	99.4041	132.009	47.9472	62.9578	37.8339	3.93477e-05	0.00216206	1
AT4G26288	NA	9.29865	4.73353	2.35731	17.1886	19.6098	36.783	3.97117e-05	0.00217696	1
AT1G77210	STP14	71.2897	64.376	66.0046	106.75	138.301	396.205	3.9858e-05	0.0021815	1
AT2G24700	NA	100.735	128.752	117.08	67.8498	57.7973	46.2415	4.00038e-05	0.00218447	1
AT3G47470	LHCA4	25854.9	19528.7	25633.4	34732.8	38360.9	42546.4	4.00399e-05	0.00218447	1
AT3G62410	CP12-2	215.419	212.062	135.152	415.241	317.885	307.926	4.05879e-05	0.00220786	1
AT5G41761	NA	6.1991	7.57365	0.785769	31.6633	12.3851	34.6811	4.05974e-05	0.00220786	1
AT4G00250	NA	40.2942	32.188	45.5746	17.1886	16.5135	9.45848	4.07871e-05	0.00221115	1
AT5G16370	AAE5	244.865	184.04	207.042	352.738	321.394	800.167	4.07389e-05	0.00221115	1
AT5G41880	POLA3	309.955	384.363	367.74	220.738	223.965	133.47	4.14225e-05	0.00224205	1
AT1G13340	NA	3.09955	1.89341	0	12.6653	8.25676	14.7132	4.16886e-05	0.00225289	1
AT2G40320	TBL33	4.64933	1.89341	0	7.23731	17.5456	18.917	4.17999e-05	0.00225535	1
AT5G53730	NA	4.64933	6.62694	1.57154	18.998	18.5777	16.8151	4.19821e-05	0.00226162	1
AT2G02450	LOV1	221.618	208.275	143.01	345.582	312.725	341.556	4.30292e-05	0.00231439	1
AT1G80050	APT2	52.6924	29.3479	37.7169	100.418	77.4071	87.2282	4.32677e-05	0.00232357	1
AT1G33700	NA	3.09955	6.62694	5.50038	21.7119	35.0912	12.6113	4.3876e-05	0.00234521	1
AT1G67320	EMB2813	423.089	481.873	478.533	263.257	320.982	170.253	4.3811e-05	0.00234521	1
AT5G65380	NA	147.229	127.805	211.372	246.069	333.367	342.607	4.38536e-05	0.00234521	1
AT3G26320	CYP71B36	1.54978	2.84012	0.785769	15.3793	6.19257	15.7641	4.39562e-05	0.00234584	1
AT1G73700	NA	7.74888	8.52035	9.42923	0	2.06419	0	4.45282e-05	0.00237267	1
AT1G67360	NA	353.349	272.651	358.311	177.314	221.9	121.909	4.48109e-05	0.00238402	1
AT1G01900	SBTI1.1	108.484	103.191	80.9342	138.414	263.184	209.138	4.49177e-05	0.00238517	1
AT2G21050	LAX2	613.711	698.669	725.265	457.76	432.448	395.154	4.49716e-05	0.00238517	1
AT1G21530	NA	10.8484	8.52035	12.5723	0.904664	2.06419	1.05094	4.52538e-05	0.00239642	1
AT1G70530	CRK3	199.921	174.194	154.796	267.781	281.762	421.428	4.55243e-05	0.00240703	1
AT3G16690	SWEET16	68.1901	63.4293	118.651	168.268	201.258	160.794	4.61363e-05	0.00243563	1
AT2G02130	LCR68	884.922	787.659	675.761	550.941	416.966	452.956	4.64333e-05	0.00244003	1
AT3G16570	RALF23	274.31	204.489	247.517	443.286	360.201	402.511	4.63776e-05	0.00244003	1
AT3G59760	OASC	897.32	809.434	881.633	538.275	598.615	521.268	4.63437e-05	0.00244003	1
AT1G14890	NA	105.385	95.6173	78.5769	177.314	142.429	243.819	4.75356e-05	0.00249412	1
AT5G28020	CYSD2	37.1946	52.0688	30.645	82.3245	84.6318	94.5848	4.76913e-05	0.00249847	1
AT1G69310	WRKY57	17.0475	30.2946	14.1438	46.1379	67.0862	54.649	4.84119e-05	0.00253235	1
AT4G24050	NA	75.939	35.0281	37.7169	155.602	72.2466	304.773	4.86864e-05	0.00254226	1
AT5G23360	NA	20.1471	18.9341	22.7873	40.7099	54.701	53.5981	4.87498e-05	0.00254226	1
AT4G01330	NA	429.288	314.306	357.525	555.464	560.428	780.85	4.89013e-05	0.00254628	1
AT2G28760	UXS6	18.5973	5.68024	0	44.3286	35.0912	44.1396	4.94859e-05	0.00257281	1
AT1G32540	LOL1	41.8439	49.2287	69.9334	94.9898	113.53	163.947	5.00989e-05	0.00260074	1
AT5G52170	HDG7	10.8484	9.46706	7.07192	34.3772	18.5777	86.1773	5.04927e-05	0.00261722	1
AT1G19150	Lhca6	426.188	360.695	386.598	609.744	604.808	625.311	5.06185e-05	0.00261977	1
AT1G13700	PGL1	43.3937	19.8808	32.2165	63.3265	77.4071	93.5339	5.09305e-05	0.00263195	1
AT1G70520	CRK2	153.428	123.072	147.725	210.787	242.542	311.079	5.10621e-05	0.00263477	1
AT2G17780	MCA2	137.93	118.338	113.151	183.647	216.74	287.958	5.1641e-05	0.00266064	1
AT2G16780	MSI2	1145.28	1299.83	1100.86	833.196	748.269	644.228	5.22812e-05	0.00268958	1
AT2G22980	SCPL13	68.1901	75.7365	63.6473	113.988	131.076	435.09	5.30274e-05	0.0027198	1
ATCG01310	RPL2.2	3900.99	4305.15	4834.69	6067.47	6702.02	9214.66	5.29606e-05	0.0027198	1
AT1G28230	PUP1	17.0475	45.4419	30.645	91.3711	83.5997	64.1075	5.35764e-05	0.00274385	1
AT5G02050	NA	731.494	728.964	882.418	512.945	525.336	382.543	5.38562e-05	0.00275406	1
AT2G30890	NA	6.1991	20.8275	8.64346	62.4218	34.9777	32.4951	5.40857e-05	0.00275757	1
AT5G23420	HMGB6	886.472	1014.87	1002.64	674.88	601.711	397.256	5.40752e-05	0.00275757	1
AT3G49790	NA	128.631	98.4574	124.151	185.456	196.098	300.57	5.48486e-05	0.0027923	1
AT5G20250	DIN10	3099.55	3687.42	2179.72	6689.09	3727.93	21075.6	5.51732e-05	0.00280467	1
AT5G41315	GL3	66.6404	83.3101	94.2923	27.1399	36.1233	46.2415	5.62321e-05	0.00285426	1
AT1G27880	NA	164.276	251.824	190.156	110.369	118.691	95.6358	5.64198e-05	0.00285955	1
AT3G26280	CYP71B4	0	0	0	9.95131	4.12838	4.20377	5.67047e-05	0.00286974	1
AT3G21790	NA	108.484	80.47	72.2907	157.412	151.718	181.813	5.7184e-05	0.00288973	1
AT2G36355	NA	3.09955	4.73353	2.35731	26.2353	11.353	13.6623	5.76771e-05	0.00291036	1
AT1G49920	NA	38.7444	59.6425	57.3611	13.57	27.8666	17.866	5.82007e-05	0.00292816	1
AT3G60320	NA	841.528	814.167	678.119	1249.34	1219.94	1170.75	5.81799e-05	0.00292816	1
AT4G28040	UMAMIT33	0	0.946706	0	7.23731	2.06419	76.7188	5.87233e-05	0.00295011	1
AT2G29940	ABCG31	0	3.78682	1.57154	5.42799	20.6419	17.866	5.94716e-05	0.00298333	1
AT1G51460	ABCG13	269.661	288.745	372.454	114.892	203.323	176.558	5.98617e-05	0.00299851	1
AT4G02060	PRL	1421.14	1899.09	1692.55	993.321	1163.17	675.756	6.04523e-05	0.00301927	1
AT4G13495	NA	419.989	436.431	527.251	682.117	827.74	711.488	6.03798e-05	0.00301927	1
AT1G21680	NA	103.835	109.818	62.8615	188.17	141.397	575.917	6.06356e-05	0.00302401	1
AT3G02210	COBL1	299.107	338.921	300.949	201.74	177.52	200.73	6.12038e-05	0.00304792	1
AT1G10070	BCAT-2	1.54978	1.89341	0	2.71399	5.16047	260.634	6.1945e-05	0.00308035	1
AT3G45710	NA	0	2.84012	0.785769	17.1886	12.3851	5.25471	6.21704e-05	0.00308708	1
AT4G14700	ORC1A	46.4933	47.3353	66.7904	24.4259	25.8024	14.7132	6.39867e-05	0.00317267	1
AT1G10470	ARR4	327.003	250.877	330.023	489.423	618.225	435.09	6.46885e-05	0.00319821	1
AT4G03420	NA	20.1471	30.2946	47.1461	58.8032	93.9206	119.807	6.46437e-05	0.00319821	1
AT4G27654	NA	40.2942	40.7084	30.645	88.6571	63.9899	86.1773	6.54006e-05	0.00322476	1
AT5G47550	NA	29.4457	24.6144	28.2877	58.8032	61.9257	56.7509	6.54139e-05	0.00322476	1
AT5G56550	OXS3	65.0906	91.8305	121.008	178.219	157.911	235.411	6.59373e-05	0.0032459	1
AT4G21510	FBS2	9.29865	3.78682	4.71461	31.6633	12.3851	29.4264	6.61343e-05	0.00325092	1
AT2G36430	NA	18.5973	8.52035	8.64346	33.4726	31.9949	35.732	6.64094e-05	0.00325977	1
AT1G14250	NA	9.29865	8.52035	8.64346	26.2353	20.6419	35.732	6.68038e-05	0.00327444	1
AT1G01380	ETC1	48.043	47.3353	59.7184	9.04664	12.3851	29.4264	6.73781e-05	0.00329787	1
AT5G64550	NA	165.826	138.219	146.939	77.8011	95.9848	60.9547	6.78605e-05	0.00331674	1
AT5G54145	NA	12.3982	30.2946	40.86	66.9452	69.1504	89.3301	6.8948e-05	0.00336509	1
AT1G72210	NA	142.579	157.153	154.796	94.0851	76.375	84.0754	7.10682e-05	0.00346311	1
AT5G62440	NA	530.023	669.321	685.976	398.052	420.063	256.43	7.11585e-05	0.00346311	1
AT2G45050	GATA2	164.276	107.924	85.6488	238.831	191.97	293.213	7.17842e-05	0.00348861	1
AT1G65730	YSL7	15.4978	17.9874	37.7169	2.71399	8.25676	5.25471	7.22255e-05	0.00350508	1
AT3G22420	WNK2	110.034	88.0437	117.08	170.982	178.552	219.647	7.24596e-05	0.00351147	1
AT3G51420	SSL4	314.604	312.413	322.951	452.332	513.983	518.115	7.33126e-05	0.00354779	1
AT2G29570	PCNA2	1160.78	1194.74	1093	792.486	774.071	531.777	7.39565e-05	0.00356887	1
AT3G46780	PTAC16	4643.13	4094.5	3840.84	6499.11	6191.54	6569.44	7.38603e-05	0.00356887	1
AT4G19170	NCED4	61.991	60.5892	58.1469	84.1338	187.841	142.928	7.42741e-05	0.00357916	1
AT4G34790	NA	4.64933	3.78682	0.785769	14.4746	12.3851	16.8151	7.47045e-05	0.00359484	1
AT4G23400	PIP1;5	123.982	94.6706	120.223	195.407	179.585	223.851	7.49911e-05	0.00360357	1
AT4G25630	FIB2	1470.74	1813.89	2365.95	1160.68	1160.07	666.298	7.5101e-05	0.0036038	1
AT1G22890	NA	114.683	71.9497	77.0053	142.032	163.071	406.715	7.55699e-05	0.00362122	1
AT1G02810	NA	12.3982	10.4138	11.0008	0.904664	4.12838	0	7.63944e-05	0.00364544	1
AT4G25750	ABCG4	1.54978	12.3072	7.07192	18.0933	31.9949	32.5792	7.63527e-05	0.00364544	1
AT5G08275	NA	0	0	0	6.33265	2.06419	9.45848	7.63049e-05	0.00364544	1
AT1G22740	RABG3B	37.1946	22.7209	23.5731	73.2778	47.4764	108.247	7.7371e-05	0.00368691	1
AT5G58760	DDB2	114.683	159.047	139.867	51.5659	88.7602	35.732	7.78895e-05	0.00370646	1
AT2G32090	NA	133.281	87.097	121.008	214.405	169.264	300.57	7.80108e-05	0.00370708	1
AT1G67900	NA	258.813	284.959	300.164	403.48	500.566	442.447	7.90979e-05	0.00375353	1
AT5G60850	OBP4	85.2377	72.8964	92.7207	123.034	177.52	179.711	8.11972e-05	0.00384782	1
AT2G26975	COPT6	60.4413	42.6018	34.5738	93.1804	86.696	108.247	8.42107e-05	0.00398512	1
AT3G19010	NA	57.3417	39.7617	54.218	85.0384	102.177	129.266	8.43836e-05	0.00398779	1
AT1G62990	KNAT7	7.74888	6.62694	6.28615	18.0933	20.6419	29.4264	8.45543e-05	0.00399036	1
AT4G18425	NA	0	0	0	9.04664	10.3209	1.05094	8.63873e-05	0.00407126	1
AT3G54140	PTR1	85.2377	109.818	99.0069	157.412	195.066	173.406	8.66797e-05	0.00407383	1
AT5G39530	NA	551.72	382.469	598.756	699.306	977.394	1011.01	8.66095e-05	0.00407383	1
AT1G55610	BRL1	17.0475	13.2539	13.3581	28.0446	42.3159	47.2924	8.71066e-05	0.00408828	1
AT1G11420	DUF2	52.6924	82.3634	77.0053	31.6633	31.9949	34.6811	8.72855e-05	0.00409108	1
AT1G79910	NA	9.29865	5.68024	3.14308	18.998	17.5456	32.5792	8.75859e-05	0.00409398	1
AT5G01240	LAX1	485.08	442.112	341.809	700.21	583.134	925.88	8.75865e-05	0.00409398	1
AT2G23050	NPY4	40.2942	54.9089	35.3596	16.284	21.674	7.3566	8.81678e-05	0.00411554	1
AT2G18560	NA	46.4933	22.7209	39.2884	75.0871	95.9848	74.6169	8.89278e-05	0.00414537	1
AT2G06520	PSBX	6206.85	4911.51	4995.92	8281.3	8053.44	8574.64	8.909e-05	0.00414728	1
AT5G46220	NA	0	0	2.35731	4.52332	10.3209	10.5094	8.97063e-05	0.00417031	1
AT5G11650	NA	210.77	251.824	254.589	173.696	92.8885	102.992	9.18667e-05	0.00426495	1
AT5G62720	NA	463.383	491.34	326.88	862.145	566.62	829.194	9.34033e-05	0.00433042	1
AT1G79470	NA	407.591	451.579	480.105	313.919	284.858	234.36	9.49721e-05	0.00439721	1
AT2G34170	NA	254.163	213.009	148.51	307.586	351.944	499.198	9.5799e-05	0.00442951	1
AT3G59880	NA	1.54978	2.84012	2.35731	9.95131	15.4814	12.6113	9.89254e-05	0.0045679	1
AT3G15850	FAD5	1069.35	1067.88	1077.29	1533.41	1601.81	1702.53	9.94418e-05	0.00458557	1
AT1G24880	LpxC2	518.942	395.269	563.341	885.504	646.793	1012.71	0.000101138	0.0046369	1
AT2G33860	ETT	624.56	681.628	588.541	364.58	424.191	428.785	0.000101041	0.0046369	1
AT4G26580	NA	0	0	0.785769	5.42799	7.22466	7.3566	0.00010082	0.0046369	1
AT5G52250	RUP1	35.6448	29.3479	32.2165	61.5172	60.8936	106.145	0.000101232	0.0046369	1
AT5G57785	NA	46.4933	56.8024	39.2884	92.2758	82.5676	130.317	0.000100958	0.0046369	1
AT3G23080	NA	469.582	347.441	418.029	591.65	686.343	692.571	0.000101468	0.00464153	1
AT4G39950	CYP79B2	29.4457	28.4012	18.8585	8.14198	9.28885	7.3566	0.00010265	0.00468935	1
AT5G27330	NA	1379.3	1569.64	1745.19	1061.17	1067.19	768.239	0.000103385	0.0047166	1
AT3G47250	NA	280.509	263.184	231.802	364.58	422.127	448.752	0.000103942	0.00473572	1
AT2G41560	ACA4	1246.02	1192.85	946.851	1803.9	1516.15	2667.29	0.000104405	0.0047505	1
AT3G03820	SAUR29	0	0.946706	0	5.42799	8.25676	6.30566	0.00010493	0.00476806	1
AT1G20510	OPCL1	530.023	642.813	568.111	445.095	202.291	245.921	0.000106116	0.00480917	1
AT1G31310	NA	215.419	258.451	305.664	170.077	111.466	153.438	0.000106022	0.00480917	1
AT2G38310	PYL4	632.309	695.829	831.343	1292.77	918.564	1408.26	0.000106574	0.00482359	1
AT1G14150	PnsL2	139.48	143.899	91.935	198.121	221.9	274.296	0.000108657	0.0048961	1
AT1G78530	NA	3.09955	3.78682	1.57154	12.6653	19.6098	9.45848	0.000108394	0.0048961	1
AT2G17880	NA	224.717	203.542	253.018	357.342	323.046	758.781	0.000108891	0.0048961	1
AT3G13898	NA	18.5973	24.6144	11.0008	5.42799	3.09628	4.20377	0.000108772	0.0048961	1
AT5G23750	NA	3.09955	3.78682	13.3581	23.5213	33.027	21.0189	0.000108578	0.0048961	1
AT1G28080	NA	0	0.946706	1.57154	7.23731	7.22466	9.45848	0.000109687	0.00492543	1
AT1G71930	VND7	0	0	1.57154	8.14198	8.25676	7.3566	0.000111033	0.00497936	1
AT2G23910	NA	89.887	150.526	99.0069	61.5172	54.701	42.0377	0.000111878	0.00501006	1
AT4G12320	CYP706A6	0	1.97862	2.40445	9.48088	12.54	8.91199	0.000112011	0.00501006	1
AT2G36970	NA	0	1.89341	1.57154	9.04664	5.16047	14.7132	0.000112188	0.00501144	1
AT3G18830	PMT5	545.521	435.485	311.95	848.575	559.395	1162.34	0.000112984	0.0050339	1
AT4G17250	NA	147.229	140.112	115.508	237.927	190.938	287.958	0.000112875	0.0050339	1
AT1G10657	NA	210.77	234.783	226.301	144.746	142.429	101.941	0.000113573	0.00505354	1
AT5G43870	NA	94.5363	144.846	105.293	210.787	211.579	191.272	0.00011389	0.00506108	1
AT5G44635	MCM6	630.759	923.985	848.63	483.091	504.694	236.462	0.000115661	0.00513312	1
AT1G14290	SBH2	173.575	170.407	155.582	246.069	252.863	374.136	0.0001165	0.00516308	1
AT3G06020	FAF4	52.6924	59.6425	50.2892	101.322	94.9527	109.298	0.000116939	0.00516308	1
AT3G23880	NA	20.1471	16.094	21.2158	56.9939	35.0912	49.3943	0.000116932	0.00516308	1
AT3G50410	OBP1	244.865	257.504	312.736	162.84	135.204	184.966	0.000116786	0.00516308	1
AT4G24380	NA	486.63	435.485	586.969	335.63	320.982	196.526	0.000118014	0.00520386	1
AT5G15230	GASA4	2267.32	2568.41	1483.53	4043.85	2906.38	4424.47	0.00011852	0.00521943	1
AT1G22885	NA	21.6969	32.188	25.9304	46.1379	62.9578	91.432	0.000119448	0.00523425	1
AT1G66480	NA	0	0	3.14308	11.7606	9.28885	6.30566	0.000119122	0.00523425	1
AT1G68010	HPR	2118.54	1918.03	2248.08	2718.52	3477.13	3671.99	0.000119467	0.00523425	1
AT2G16440	MCM4	906.619	1216.52	1282.37	664.024	765.814	370.983	0.000119264	0.00523425	1
AT1G31580	ECS1	24.7964	29.3479	15.7154	49.7565	75.3429	49.3943	0.000121528	0.00529985	1
AT3G21270	DOF2	41.8439	35.0281	28.2877	64.2312	84.6318	71.4641	0.000121183	0.00529985	1
AT4G10310	HKT1	3.09955	4.73353	0.785769	12.6653	25.8024	10.5094	0.000121524	0.00529985	1
AT5G21280	NA	41.8439	55.8557	51.8607	112.178	85.6639	96.6867	0.000121583	0.00529985	1
AT3G45680	NA	0	1.89341	0	8.14198	9.28885	6.30566	0.000121824	0.00530359	1
AT4G19410	NA	590.465	615.794	425.682	910.997	748.135	1082.95	0.000122312	0.0053181	1
AT5G08920	NA	4.64933	3.78682	7.85769	0	0	0	0.000123739	0.00537332	1
AT4G39510	CYP96A12	495.928	452.525	480.105	264.162	364.329	229.105	0.000123969	0.00537647	1
AT3G08940	LHCB4.2	8424.58	5993.6	8273.36	10237.2	12670	14772	0.000124933	0.00541146	1
AT3G18660	PGSIP1	9.29865	6.62694	0	18.998	20.6419	49.3943	0.000125662	0.00543615	1
AT4G39790	NA	52.6924	74.7898	56.5754	28.9493	26.8345	30.4773	0.000126152	0.00545047	1
AT2G04690	NA	209.22	197.862	223.944	318.442	299.308	473.975	0.00012664	0.00546467	1
AT1G63880	NA	218.518	199.755	161.083	356.438	309.628	286.907	0.000128564	0.00553489	1
AT5G43450	NA	6.1991	13.2539	5.50038	22.6166	42.3159	23.1207	0.000128591	0.00553489	1
AT2G43120	NA	24.7964	12.3072	18.8585	52.4705	38.1875	46.2415	0.000129893	0.00558395	1
AT1G15980	PnsB1	483.53	541.516	512.321	662.214	916.5	854.416	0.0001317	0.0056545	1
AT1G61520	LHCA3	16903.4	13572.9	16035.2	20598.3	25197.6	27103.8	0.000133757	0.00572848	1
AT5G26680	NA	406.041	492.287	476.962	290.397	326.142	246.972	0.000133683	0.00572848	1
AT5G59540	NA	55.7919	67.2161	40.0742	111.274	97.0169	116.655	0.000134612	0.00575788	1
AT2G39730	RCA	20667.8	19485.1	23821.4	27424.9	42977.5	34411	0.000135977	0.00580903	1
AT2G43840	UGT74F1	68.1901	89.9371	61.29	30.7586	41.2838	30.4773	0.000137043	0.00584727	1
AT3G44300	NIT2	9.29865	3.78682	7.85769	0	0	1.05094	0.0001374	0.00585522	1
AT2G24490	RPA2	345.6	511.221	462.818	243.355	291.051	125.062	0.000138049	0.00587556	1
AT3G62100	IAA30	68.1901	56.8024	64.433	37.0912	12.3851	24.1717	0.000138707	0.00589626	1
AT2G36320	NA	182.874	144.846	106.865	287.683	208.483	306.875	0.000139135	0.00590711	1
AT2G30570	PSBW	8737.64	6957.34	7191.36	11548.9	10780.2	12993.9	0.000139521	0.00590887	1
AT4G36920	AP2	466.483	459.152	453.389	334.726	262.152	290.06	0.000139425	0.00590887	1
AT5G24920	GDU5	0	0	1.57154	9.95131	8.25676	5.25471	0.00014066	0.00594973	1
AT4G13180	NA	20.1471	22.7209	16.5011	43.4239	39.2196	55.7	0.000141116	0.00596166	1
AT3G22910	NA	96.0861	90.8838	101.364	50.6612	54.701	24.1717	0.000141597	0.00596726	1
AT5G18290	SIP1;2	3.09955	12.3072	12.5723	23.5213	29.9308	33.6302	0.000141503	0.00596726	1
AT2G45830	DTA2	1.54978	5.68024	3.14308	27.1399	8.25676	16.8151	0.000142047	0.00597155	1
AT4G28750	PSAE-1	8046.44	6255.83	6685.32	10921.1	10068.1	11140	0.000141974	0.00597155	1
AT4G35090	CAT2	663.304	449.685	741.766	722.827	1582.2	1431.38	0.00014226	0.00597316	1
AT3G58790	GAUT15	46.4933	69.1095	61.29	134.795	99.0811	112.451	0.000143721	0.00602525	1
AT3G59690	IQD13	24.7964	18.9341	19.6442	41.6146	49.5406	50.4452	0.000143852	0.00602525	1
AT1G76460	NA	144.129	150.526	134.366	201.74	232.221	375.187	0.000144925	0.00606277	1
AT2G46810	NA	232.466	219.636	187.013	328.393	379.811	314.232	0.000146439	0.00611779	1
AT3G26510	NA	105.385	134.432	158.725	233.403	187.841	467.669	0.000146597	0.00611779	1
AT4G17460	HAT1	27.896	59.6425	65.2188	190.884	80.5034	130.317	0.000147361	0.0061422	1
AT3G54890	LHCA1	30518.2	22377.3	26914.2	38388.5	40944.2	44846.9	0.000148603	0.00618643	1
AT2G39470	PnsL1	432.387	410.87	403.885	651.358	605.84	626.362	0.000150969	0.00627732	1
AT2G44490	PEN2	444.786	408.03	293.878	650.454	548.042	688.367	0.000151426	0.00628868	1
AT3G22060	NA	44.9435	17.9874	25.1446	57.8985	68.1183	137.673	0.000152309	0.00631006	1
AT4G20140	GSO1	13.948	31.2413	11.7865	31.6633	79.4713	96.6867	0.000152138	0.00631006	1
AT4G22880	LDOX	99.1857	126.859	335.523	59.7078	78.4392	19.9679	0.000152997	0.00633091	1
AT2G47700	RFI2	488.179	366.375	384.241	641.407	569.716	857.569	0.000154379	0.00638038	1
AT1G47410	NA	7.74888	15.1473	18.8585	42.5192	39.2196	30.4773	0.000155202	0.00639415	1
AT3G16120	NA	10.8484	13.2539	14.1438	27.1399	30.9628	47.2924	0.000155413	0.00639415	1
AT4G21680	NRT1.8	10.8484	0.946706	7.85769	0	0	0	0.000155459	0.00639415	1
AT5G07220	BAG3	46.4933	46.3886	78.5769	105.846	122.819	120.858	0.000155452	0.00639415	1
AT5G49730	FRO6	6.1991	6.15359	2.35731	9.62563	24.7496	27.6188	0.000155752	0.00639855	1
AT3G16430	JAL31	26.3462	44.5047	48.7177	69.6592	86.696	111.4	0.000157019	0.0064198	1
AT4G37220	NA	3.09955	1.89341	1.57154	7.23731	11.353	47.2924	0.000156983	0.0064198	1
AT5G10250	DOT3	0	0.946706	0	4.52332	5.16047	10.5094	0.000156681	0.0064198	1
AT5G54270	LHCB3	20971.6	15638.6	22454.9	27323.6	35011.8	32639.1	0.00015665	0.0064198	1
AT3G20670	HTA13	2333.96	2429.25	2580.46	1900.7	1428.42	1298.97	0.000158086	0.00645569	1
AT2G44500	NA	348.7	413.711	327.666	276.827	142.429	168.151	0.000159764	0.00651451	1
AT4G16520	ATG8F	450.985	304.839	370.097	591.65	528.433	796.614	0.000159906	0.00651451	1
AT1G05020	NA	4.64933	12.3072	3.92884	23.5213	18.5777	33.6302	0.000160533	0.0065323	1
AT3G46370	NA	3.09955	1.89341	2.35731	11.7606	11.353	12.6113	0.000161949	0.0065821	1
AT4G01080	TBL26	26.3462	20.8275	21.2158	7.23731	8.25676	7.3566	0.000163399	0.00663243	1
AT5G26820	IREG3	471.132	464.833	472.247	714.685	653.316	758.781	0.000163575	0.00663243	1
AT3G57330	ACA11	356.448	328.507	409.386	512.04	549.074	691.52	0.000163812	0.0066342	1
AT1G18730	PnsB4	296.007	246.144	222.373	466.807	399.421	362.575	0.000166139	0.00672048	1
AT4G30960	SIP3	605.962	503.648	751.981	951.707	1039.32	967.918	0.000167352	0.00676158	1
AT5G04040	SDP1	472.682	450.632	449.46	616.076	672.926	968.969	0.000168879	0.00681522	1
AT3G21230	4CL5	0	0	0	5.42799	8.25676	2.10189	0.000169453	0.00683036	1
AT4G32300	SD2-5	108.484	135.379	120.223	181.838	196.098	265.888	0.000170273	0.00685535	1
AT3G61470	LHCA2	15767.4	13342.9	13870.4	19433.1	22038.3	23736.6	0.000170638	0.00686196	1
AT4G24130	NA	9.29865	8.52035	16.5011	55.1845	30.9628	24.1717	0.000171736	0.00689803	1
AT1G08340	NA	1.54978	1.89341	3.92884	17.1886	6.19257	15.7641	0.000173075	0.00694368	1
AT5G12300	NA	7.74888	10.4138	5.50038	28.9493	20.6419	21.0189	0.000173881	0.00696785	1
AT1G06650	NA	172.025	133.486	126.509	233.403	256.992	227.004	0.000175253	0.00701159	1
AT1G79530	GAPCP-1	1156.13	1132.26	1428.53	804.247	892.762	627.413	0.000175382	0.00701159	1
AT1G07790	HTB1	1794.64	2101.69	2040.64	1503.55	1214.78	1069.86	0.000177365	0.0070826	1
AT4G14120	NA	102.285	162.833	136.724	55.1845	80.5034	26.2736	0.000177755	0.00708991	1
AT2G32860	BGLU33	0	0	0.785769	1.80933	9.28885	13.6623	0.000180724	0.00719997	1
AT5G19870	NA	0	0	0	5.42799	5.16047	4.20377	0.000182197	0.00725022	1
AT1G20030	NA	468.032	652.28	354.382	301.253	280.73	263.787	0.000184126	0.00731847	1
AT5G59090	SBT4.12	0	2.84012	4.71461	15.3793	14.4493	9.45848	0.000185272	0.00735549	1
AT5G02160	NA	2851.59	2395.17	1775.05	3980.52	3071.51	7106.47	0.000185833	0.00736924	1
AT1G08900	NA	26.3462	15.1473	14.9296	50.6612	34.0591	55.7	0.000186729	0.00739618	1
AT5G49360	BXL1	1354.5	1279.95	1289.45	1916.98	1770.04	4026.16	0.000187271	0.00740911	1
AT2G07690	MCM5	1118.94	1425.74	1309.88	796.105	892.762	440.345	0.000188594	0.00744425	1
AT2G34260	WDR55	153.428	201.648	236.516	98.6084	134.172	83.0245	0.000188536	0.00744425	1
AT1G14700	PAP3	60.4413	69.1095	79.3627	137.509	154.814	104.043	0.000189363	0.00745741	1
AT4G12870	NA	212.319	268.865	249.089	170.077	125.916	74.6169	0.000189258	0.00745741	1
AT1G15830	NA	127.082	79.5233	100.578	176.41	162.039	224.902	0.000189738	0.00746362	1
AT2G05160	NA	58.8915	48.282	49.5034	77.8011	116.627	117.706	0.000190632	0.00749019	1
AT4G33330	PGSIP3	0	0	0	2.71399	3.09628	13.6623	0.000191285	0.00749863	1
AT5G15180	NA	0	0.946706	0	8.14198	4.12838	7.3566	0.000191077	0.00749863	1
AT4G24930	NA	443.236	451.579	369.311	608.839	651.252	672.603	0.000192051	0.00752005	1
AT1G72900	NA	24.7964	35.9748	21.2158	88.6571	42.3159	78.8207	0.000192861	0.00754315	1
AT4G32200	ASY2	113.134	91.8305	107.65	63.3265	54.701	48.3434	0.000194614	0.00760306	1
AT5G62420	NA	1.54978	0	0.785769	5.42799	8.25676	8.40754	0.000196356	0.00766237	1
AT1G78430	RIP4	557.919	565.183	729.193	445.095	383.939	292.162	0.000196735	0.00766842	1
AT1G65710	NA	447.885	520.688	440.816	322.06	317.885	275.347	0.000197292	0.007678	1
AT5G55340	NA	125.532	172.3	165.797	89.5618	97.0169	67.2603	0.000197429	0.007678	1
AT2G32210	NA	181.324	154.313	159.511	111.274	86.696	86.1773	0.000199593	0.00775333	1
AT2G01918	PQL3	38.7444	29.3479	18.8585	49.7565	82.5676	74.6169	0.000200762	0.00778992	1
AT2G17540	NA	154.978	128.752	157.154	216.215	253.895	249.073	0.000201109	0.00779343	1
AT5G67411	NA	44.9435	83.3101	41.6457	18.0933	13.4172	29.4264	0.000201307	0.00779343	1
AT3G29590	AT5MAT	60.4413	71.003	120.223	22.6166	43.348	8.40754	0.000201702	0.00779989	1
AT3G02000	ROXY1	103.835	90.8838	129.652	70.5638	29.9308	37.8339	0.000203069	0.0078439	1
AT5G44910	NA	1.54978	0	0	14.4746	4.12838	6.30566	0.000203453	0.0078499	1
AT1G51960	IQD27	7.74888	6.62694	11.0008	0	2.06419	1.05094	0.000204707	0.00787051	1
AT3G57400	NA	85.2377	74.7898	73.8623	121.225	141.397	149.234	0.000204821	0.00787051	1
AT4G30190	HA2	455.634	519.742	439.245	681.212	815.355	674.705	0.000204269	0.00787051	1
AT5G08790	ATAF2	433.937	442.112	491.106	360.961	206.419	220.698	0.000204906	0.00787051	1
AT1G32440	PKp3	172.025	217.742	212.158	277.732	426.255	316.334	0.000207376	0.00795646	1
AT2G19990	PR-1-LIKE	1.54978	0.946706	0	4.52332	11.353	10.5094	0.000208645	0.0079962	1
AT2G42900	NA	17.0475	16.094	18.8585	40.7099	30.9628	73.566	0.000209094	0.00800445	1
AT3G29300	NA	15.4978	17.9874	15.7154	6.33265	5.16047	2.10189	0.000211181	0.00807532	1
AT5G18630	NA	238.665	230.05	253.018	332.916	361.233	451.905	0.000212066	0.00810012	1
AT2G32960	PFA-DSP2	10.8484	13.2539	21.2158	38.9006	44.3801	31.5283	0.000213999	0.00816485	1
AT2G15042	NA	0	2.84012	0	8.14198	5.16047	15.7641	0.000214536	0.00817622	1
AT1G63650	EGL3	192.172	298.212	352.024	183.647	148.622	108.247	0.000215504	0.00820402	1
AT1G20140	SK4	232.466	247.09	261.661	176.41	147.59	126.113	0.000217673	0.00827735	1
AT4G22680	MYB85	0	0	0	4.52332	3.09628	7.3566	0.000220301	0.00836801	1
AT3G48970	NA	18.5973	27.4545	23.5731	5.42799	11.353	7.3566	0.000220891	0.00838115	1
AT4G29700	NA	274.31	250.877	210.586	147.46	161.007	140.826	0.000223073	0.00845457	1
AT1G04730	CTF18	240.215	297.266	266.376	123.939	203.323	130.317	0.000226521	0.00856125	1
AT1G10650	NA	235.566	256.557	299.378	170.982	176.488	120.858	0.000226788	0.00856125	1
AT1G25098	NA	1706.29	2106.68	1955.21	2580.56	2833.75	3687.6	0.000227137	0.00856125	1
AT2G35020	GlcNAc1pUT2	370.396	390.99	410.957	527.419	634.738	624.26	0.000227018	0.00856125	1
AT4G02380	SAG21	106.656	92.5594	85.6881	320.45	106.388	231.817	0.000226153	0.00856125	1
AT1G06000	NA	533.123	631.453	1106.36	268.685	522.24	201.781	0.000227706	0.00857326	1
AT3G26650	GAPA	9638.06	8349	9241.43	11658.4	15548.5	14411.6	0.000228679	0.00860045	1
AT1G20160	ATSBT5.2	0	0	0	2.71399	7.22466	5.25471	0.000230694	0.00863867	1
AT1G43605	NA	0	0	0	0.904664	15.4814	6.30566	0.000229976	0.00863867	1
AT2G33060	RLP27	145.679	136.326	97.4353	180.933	248.735	240.666	0.000230956	0.00863867	1
AT2G42870	PAR1	136.38	119.285	93.5065	237.927	148.622	299.519	0.000230705	0.00863867	1
AT3G26200	CYP71B22	9.29865	6.62694	1.57154	21.7119	14.4493	65.1584	0.00023048	0.00863867	1
AT3G23830	GRP4	981.008	937.239	1215.58	754.49	650.22	627.413	0.000231996	0.0086681	1
AT5G19230	NA	91.4368	81.4167	135.152	180.933	157.911	286.907	0.00023339	0.0087107	1
AT2G01830	WOL	399.842	493.234	469.89	220.738	359.169	203.883	0.000234905	0.00874818	1
AT5G46280	MCM3	830.68	1190.01	1158.22	554.559	768.911	326.843	0.000234835	0.00874818	1
AT2G40550	ETG1	481.98	708.136	649.045	341.963	440.705	211.239	0.00023545	0.00875894	1
AT3G09870	NA	128.631	136.326	121.794	89.5618	58.8294	47.2924	0.000236154	0.00877561	1
AT4G21850	MSRB9	426.188	420.337	480.891	344.677	234.286	235.411	0.000237126	0.0088022	1
AT4G18205	NA	77.4888	63.4293	44.0031	160.126	79.4713	208.801	0.00023832	0.00883694	1
AT3G24320	MSH1	275.86	394.776	337.095	172.791	234.286	203.883	0.000238886	0.00884832	1
AT5G01660	NA	77.4888	80.47	76.2196	47.0425	41.2838	33.6302	0.000242051	0.00895588	1
AT1G17700	PRA1.F1	0	0	0	8.14198	4.12838	3.15283	0.000243435	0.00899737	1
AT1G30070	NA	286.709	283.065	332.38	193.598	211.579	158.692	0.00024389	0.00900447	1
AT2G32940	AGO6	85.2377	106.978	104.507	39.8052	66.0541	42.0377	0.00024424	0.00900514	1
AT5G06130	NA	520.725	486.607	426.672	698.401	668.797	835.499	0.000244433	0.00900514	1
AT4G13830	J20	317.704	369.215	242.017	490.328	429.351	692.571	0.000248179	0.00913331	1
AT5G21170	AKINBETA1	480.43	330.4	341.809	649.549	489.213	1777.14	0.000249231	0.00916219	1
AT1G57980	NA	12.3982	21.7742	13.3581	47.0425	26.8345	57.8018	0.000251461	0.00923424	1
AT1G03980	PCS2	30.9955	23.6677	18.8585	5.42799	12.3851	6.30566	0.000253477	0.00927846	1
AT1G09340	CRB	2797.35	2931	2717.19	3617.75	4817.82	4340.39	0.000253302	0.00927846	1
AT4G34410	RRTF1	948.463	1088.71	1088.29	835.91	518.112	542.286	0.000253021	0.00927846	1
AT1G62810	CuAO1	32.5453	27.4545	25.1446	56.9939	48.5085	78.8207	0.000254038	0.00928905	1
AT2G01890	PAP8	9.29865	6.62694	12.5723	31.6633	36.1233	17.866	0.000257072	0.00938997	1
AT1G56650	PAP1	32.5453	22.7209	58.9327	9.95131	14.4493	1.05094	0.000257349	0.00939008	1
AT1G33420	NA	192.172	228.156	218.444	136.604	141.397	100.89	0.000258032	0.009395	1
AT5G20820	NA	0	0.946706	0	16.284	4.12838	3.15283	0.000257997	0.009395	1
AT1G43670	FBP	942.264	923.038	691.477	1200.49	1225.1	1947.4	0.000258389	0.00939801	1
AT3G01830	NA	21.6969	23.6677	25.1446	12.6653	2.06419	6.30566	0.000259557	0.00942049	1
AT3G17580	NA	4.64933	2.84012	0.785769	18.998	11.353	9.45848	0.000259534	0.00942049	1
AT1G01720	ATAF1	939.164	829.314	976.711	685.736	508.823	590.63	0.000260527	0.0094457	1
AT3G46320	NA	1280.41	1338.48	1478.99	1073.28	802.887	730.573	0.000261083	0.00944586	1
AT3G52840	BGAL2	413.79	435.485	464.389	549.131	690.471	1411.42	0.000261075	0.00944586	1
AT3G22104	NA	173.575	165.674	149.296	237.022	328.206	241.717	0.000261812	0.00946223	1
AT5G58610	NA	91.4368	63.4293	73.8623	21.7119	44.3801	36.783	0.000264889	0.00956337	1
AT3G52630	NA	255.713	259.397	244.374	163.744	144.493	62.0056	0.000266803	0.00961219	1
AT4G20070	AAH	46.4933	31.2413	44.7888	62.4218	90.8243	114.553	0.000266796	0.00961219	1
AT5G03170	FLA11	35.6448	39.7617	36.1454	63.3265	78.4392	75.6679	0.000267477	0.00962637	1
AT5G14580	NA	365.747	562.343	493.463	301.253	318.917	254.328	0.000267818	0.00962852	1
AT2G26040	PYL2	32.5453	53.9622	61.29	26.2353	19.6098	10.5094	0.000270363	0.00969798	1
AT4G27435	NA	9.29865	2.84012	7.07192	21.7119	15.4814	27.3245	0.000270599	0.00969798	1
AT5G49480	CP1	370.396	327.56	434.53	164.649	292.083	125.062	0.000270238	0.00969798	1
AT3G10190	NA	179.774	215.849	240.445	130.272	141.397	100.89	0.000272849	0.0097582	1
AT3G19430	NA	0	0.946706	0.785769	4.52332	14.4493	5.25471	0.000272733	0.0097582	1
AT2G04850	NA	24.7964	19.8808	17.2869	32.5679	93.9206	53.5981	0.000274673	0.00981319	1
AT5G59320	LTP3	34.0951	17.9874	43.2173	9.95131	10.3209	0	0.000275647	0.00983773	1
AT3G52060	NA	421.539	521.626	424.315	619.695	663.627	1317.88	0.000276689	0.00986462	1
AT5G57980	RPB5C	20.1471	7.57365	24.3588	4.52332	5.16047	2.10189	0.000281247	0.0100167	1
AT1G44170	ALDH3H1	296.007	266.024	282.877	167.363	201.258	171.304	0.000282096	0.010034	1
AT5G40850	UPM1	677.252	737.484	649.045	1257.48	1140.46	844.958	0.000282318	0.010034	1
AT1G12370	PHR1	210.77	254.664	293.092	121.225	182.681	75.6679	0.000284286	0.0100935	1
AT1G74880	NdhO	458.734	503.648	373.24	657.691	649.188	758.781	0.000284876	0.0101039	1
AT1G72920	NA	24.7964	36.9215	29.8592	68.7545	47.4764	114.553	0.000285245	0.0101066	1
AT5G02600	NAKR1	7.74888	0.946706	1.57154	17.1886	16.5135	10.5094	0.000285906	0.0101195	1
AT5G57780	P1R1	69.7399	66.2694	40.0742	102.227	152.75	106.145	0.000287026	0.0101487	1
AT3G50220	IRX15	0	0	0	11.7606	1.03209	5.25471	0.000287568	0.0101574	1
AT1G33960	AIG1	3.09955	0	0	8.14198	8.25676	8.40754	0.000288579	0.0101826	1
AT5G27350	SFP1	49.5928	53.0155	67.5761	99.5131	117.659	98.7886	0.000289571	0.0102071	1
AT1G21830	NA	134.83	172.3	134.366	291.302	231.189	216.494	0.000291525	0.0102654	1
AT1G56110	NOP56	3857.39	4434.37	5279.58	2922.97	3309.93	2259.53	0.000292379	0.0102744	1
AT2G24550	NA	159.627	151.473	156.368	280.446	242.542	222.8	0.000292185	0.0102744	1
AT4G22250	NA	97.6359	109.818	93.5065	53.3752	62.9578	47.2924	0.000294611	0.0103422	1
AT5G51970	NA	401.392	297.266	352.024	534.657	474.764	688.367	0.000297549	0.0104346	1
AT1G61340	FBS1	725.295	954.28	953.138	673.975	425.223	504.452	0.000297978	0.0104384	1
AT3G60660	NA	79.0386	123.072	97.4353	48.8519	57.7973	49.3943	0.000298265	0.0104384	1
AT4G12800	PSAL	14002.2	12531.5	12084.3	17793.8	18319.7	21246.9	0.00030478	0.0106555	1
AT5G54060	UF3GT	23.2466	45.4419	84.863	9.04664	19.6098	1.05094	0.000307501	0.0107396	1
AT1G05570	CALS1	489.729	638.08	529.608	328.393	372.586	377.288	0.000308164	0.0107491	1
AT1G70940	PIN3	452.535	444.952	492.677	638.693	734.852	699.928	0.000308398	0.0107491	1
AT3G15840	PIFI	437.037	447.792	335.523	641.407	535.657	813.43	0.000310174	0.0108	1
AT3G48250	BIR6	168.926	164.727	196.442	107.655	117.659	88.2792	0.000312595	0.0108732	1
AT2G29300	NA	9.29865	5.68024	8.64346	27.1399	22.7061	17.866	0.000314063	0.0109132	1
AT1G30755	NA	34.0951	32.188	33.7881	66.9452	58.8294	68.3113	0.000315021	0.0109284	1
AT3G23170	NA	125.532	132.539	153.225	225.261	200.226	245.921	0.000315139	0.0109284	1
AT2G28470	BGAL8	982.558	1225.98	1173.94	1408.56	2140.56	1823.39	0.000315922	0.0109444	1
AT5G57887	NA	27.3535	40.4622	14.5917	63.4079	58.1585	91.8734	0.000316239	0.0109444	1
AT5G65410	HB25	1481.59	1398.28	1412.81	1109.12	866.96	880.69	0.000316755	0.0109512	1
AT3G46090	ZAT7	6.1991	1.89341	7.85769	27.1399	15.4814	15.7641	0.000317368	0.0109613	1
AT5G07760	NA	4.64933	4.73353	4.71461	0	0	0	0.000319318	0.0110176	1
AT5G45650	NA	196.822	233.836	222.373	346.486	464.443	281.653	0.000320106	0.0110337	1
AT3G22070	NA	40.2942	35.9748	35.3596	65.1358	69.1504	78.8207	0.00032249	0.0111047	1
AT1G19400	NA	302.206	315.253	315.879	441.476	433.48	547.541	0.000323308	0.0111217	1
AT2G26440	NA	182.874	177.034	125.723	239.736	245.639	388.849	0.000325528	0.0111868	1
AT1G51790	NA	0	0	0	5.42799	4.12838	4.20377	0.000327041	0.0112275	1
AT3G23740	NA	159.627	261.291	200.371	123.034	112.498	46.2415	0.000327725	0.0112398	1
AT2G20980	MCM10	147.229	176.087	196.442	103.132	92.8885	34.6811	0.000328451	0.0112534	1
AT3G18773	NA	9.29865	1.89341	3.92884	12.6653	18.5777	31.5283	0.000330442	0.0113103	1
AT2G27930	NA	1.54978	2.84012	0	4.52332	9.28885	24.1717	0.000331227	0.0113259	1
AT1G01240	NA	85.2377	77.6299	113.151	143.842	154.814	207.036	0.000332995	0.011375	1
AT1G10360	GSTU18	147.229	90.8838	126.509	195.407	207.451	221.749	0.0003344	0.0114116	1
AT3G18524	MSH2	413.79	605.892	524.446	294.016	381.885	269.041	0.000335352	0.0114327	1
AT3G53470	NA	148.778	97.5107	122.58	196.312	187.841	263.787	0.000336155	0.0114369	1
AT5G13520	NA	1033.7	1128.47	1226.59	708.352	848.382	708.335	0.000336478	0.0114369	1
AT5G36670	NA	0	0	0	59.3279	0	4.1302	0.000336327	0.0114369	1
AT1G78650	POLD3	302.206	393.83	319.808	205.359	238.414	202.832	0.000339763	0.0115162	1
AT2G02710	PLPB	433.937	366.375	353.596	606.125	480.956	957.409	0.000339943	0.0115162	1
AT3G23110	RLP37	4.64933	4.73353	3.92884	9.95131	21.674	18.917	0.000339621	0.0115162	1
AT5G48480	NA	1608.67	1849.86	1932.21	1351.57	1141.5	1100.34	0.000340154	0.0115162	1
AT3G26100	NA	97.6359	101.298	110.793	161.935	156.878	212.29	0.000342481	0.0115835	1
AT3G53990	NA	350.249	349.335	220.015	665.833	417.998	514.962	0.000344072	0.0116144	1
AT5G09420	TOC64-V	137.93	163.78	173.655	105.846	91.8564	78.8207	0.000343958	0.0116144	1
AT5G10510	AIL6	116.233	117.392	117.865	49.7565	74.3108	70.4132	0.000344727	0.0116251	1
AT1G03090	MCCA	579.616	357.855	419.601	685.736	567.652	3870.62	0.000345539	0.011633	1
AT3G22970	NA	492.829	390.99	415.672	594.364	652.284	740.915	0.000345642	0.011633	1
AT1G12240	ATBETAFRUCT4	368.847	367.322	524.108	476.758	776.135	1876.98	0.00034626	0.0116423	1
AT5G08020	RPA70B	327.003	594.531	533.537	230.689	331.302	118.757	0.0003474	0.0116656	1
AT5G13140	NA	784.187	723.283	674.19	1073.84	992.875	1163.39	0.000347634	0.0116656	1
AT3G03530	NPC4	0	0	0	4.52332	6.19257	3.15283	0.000351447	0.0117821	1
AT1G56612	NA	48.043	63.4293	67.5761	96.7991	111.466	122.96	0.000355146	0.0118834	1
AT3G48700	CXE13	52.6924	47.3353	121.794	14.4746	38.1875	14.7132	0.000355164	0.0118834	1
AT3G28180	CSLC04	96.0861	112.658	120.223	281.351	195.066	143.979	0.000356393	0.0119129	1
AT5G36740	NA	203.021	261.291	212.158	123.414	150.686	139.849	0.000356753	0.0119133	1
AT2G06995	NA	0	0	0	9.04664	2.06419	4.20377	0.000357887	0.0119396	1
AT2G35600	BRXL1	32.5453	25.5611	11.7865	8.14198	3.09628	7.3566	0.000358402	0.0119451	1
AT1G60190	PUB19	55.7919	77.6299	98.2211	33.4726	46.4443	24.1717	0.000360547	0.0120049	1
AT1G07370	PCNA1	903.519	1174.86	1126.01	680.308	709.049	307.926	0.000362968	0.0120738	1
AT2G24570	WRKY17	226.267	187.448	156.368	131.176	89.7923	98.7886	0.000363782	0.0120891	1
AT5G40460	NA	100.735	103.191	107.65	62.4218	62.9578	49.3943	0.000365587	0.0121373	1
AT3G45600	TET3	10.8484	14.2006	11.0008	32.5679	42.3159	22.0698	0.000367005	0.0121609	1
AT4G32260	PDE334	3844.99	3599.38	3265.66	5147.54	5054.17	5437.58	0.000366738	0.0121609	1
AT1G21670	NA	254.163	314.306	156.368	412.527	337.495	785.054	0.000369045	0.0122107	1
AT2G30870	GSTF10	675.702	603.052	434.53	1129.93	715.242	1046.74	0.000369222	0.0122107	1
AT1G71870	NA	141.03	99.4041	115.508	73.2778	34.0591	62.0056	0.00036987	0.0122203	1
AT5G23570	SGS3	260.362	268.865	333.952	155.602	172.36	208.087	0.000371543	0.0122638	1
AT2G19490	RECA2	196.822	191.235	220.015	132.986	131.076	75.6679	0.000376141	0.0124036	1
AT1G60000	NA	657.105	606.839	696.977	907.378	1081.64	924.829	0.000378737	0.0124772	1
AT5G23300	PYRD	519.175	585.064	673.404	368.198	439.672	346.811	0.000379149	0.0124788	1
AT4G24480	NA	1.54978	7.57365	2.35731	8.14198	33.027	18.917	0.000379841	0.0124895	1
AT3G01860	NA	179.774	161.887	117.08	255.115	218.804	310.028	0.00038136	0.0125275	1
AT1G48490	NA	168.926	255.611	174.441	277.732	334.399	413.02	0.000382952	0.0125677	1
AT1G67040	TRM22	530.023	522.582	567.325	370.008	352.976	373.085	0.000386141	0.0126603	1
AT5G54470	BBX29	77.4888	32.188	96.6496	28.9493	24.7703	9.45848	0.000391822	0.0128342	1
AT4G05400	NA	568.768	580.331	666.332	453.237	399.421	313.181	0.000395547	0.0129439	1
AT5G56000	Hsp81.4	1086.44	1096.23	1277.97	748.736	882.833	571.87	0.000396183	0.0129523	1
AT1G78240	TSD2	550.17	590.745	619.972	778.011	834.965	1107.69	0.000396621	0.0129543	1
AT5G23940	PEL3	4790.36	4971.15	5876.77	2885.88	4183.08	2771.34	0.000397068	0.0129565	1
AT1G04280	NA	469.582	311.466	360.668	664.928	465.475	904.862	0.000399073	0.0130096	1
AT1G74030	ENO1	1084.84	1083.98	1256.44	795.2	837.029	580.12	0.000399906	0.0130243	1
AT1G75430	BLH11	10.8484	19.8808	14.1438	6.33265	1.03209	4.20377	0.000400749	0.0130394	1
AT5G33300	NA	297.557	305.786	280.519	204.454	193.002	183.915	0.000401454	0.0130499	1
AT1G75820	CLV1	461.833	499.861	349.667	691.164	566.62	944.797	0.000403839	0.013115	1
AT3G63030	MBD4	156.527	135.379	141.438	96.7991	80.5034	76.7188	0.000406613	0.0131926	1
AT3G56770	NA	13.948	21.7742	17.2869	6.33265	4.12838	6.30566	0.000408105	0.0132285	1
AT3G61440	CYSC1	1621.07	1462.66	1430.1	2165.77	2048.71	2411.91	0.000408812	0.0132371	1
AT5G07830	GUS2	122.432	119.285	124.151	201.74	174.424	213.341	0.000409143	0.0132371	1
AT5G50950	FUM2	1.54978	0.946706	1.57154	2.71399	15.4814	15.7641	0.000409694	0.0132424	1
AT3G29240	NA	968.61	638.08	1099.29	1197.78	1584.27	1854.91	0.000411747	0.0132962	1
AT5G64570	XYL4	4419.96	3798.18	3371.73	7039.19	4310.03	9758	0.000412378	0.013304	1
AT2G45570	CYP76C2	27.896	28.4012	18.0727	12.6653	7.22466	3.15283	0.000413235	0.0133191	1
AT1G72280	ERO1	49.5928	48.282	33.7881	14.4746	24.7703	16.8151	0.000419012	0.0134926	1
AT4G04955	ALN	99.1857	82.3634	91.935	143.842	145.525	169.202	0.000420452	0.0135263	1
AT1G21540	NA	20.1471	19.8808	23.5731	41.6146	39.2196	65.1584	0.000423883	0.0136239	1
AT4G16980	NA	1024.4	1014.87	1316.16	1645.58	2381.04	1470.27	0.000424523	0.0136317	1
AT2G41090	NA	127.082	85.2035	123.366	199.026	166.167	213.341	0.000426312	0.0136763	1
AT5G51990	CBF4	75.939	108.871	73.0765	55.1845	23.7382	34.6811	0.000427585	0.0137043	1
AT5G61460	MIM	263.462	284.959	281.305	151.984	205.387	172.355	0.000431012	0.0138013	1
AT1G29920	CAB2	65959.2	40336.3	65840.1	85634.7	101327	92360.2	0.000434476	0.0138992	1
AT4G23690	DIR6	0	4.73353	3.92884	8.14198	18.5777	15.7641	0.000446284	0.0142636	1
AT1G66230	MYB20	13.948	13.2539	22.7873	34.3772	45.4122	38.8849	0.000447669	0.0142815	1
AT3G22660	NA	719.096	814.167	971.21	583.508	565.588	507.605	0.000447676	0.0142815	1
AT4G27300	NA	6.1991	1.89341	4.71461	13.57	18.5777	14.7132	0.000449425	0.0143239	1
AT2G36830	GAMMA-TIP	1555.97	1946.43	1604.54	2322.27	2688.61	2573.76	0.000449954	0.0143274	1
AT4G36010	NA	246.414	409.924	242.803	196.312	163.071	153.438	0.000451596	0.0143664	1
AT1G07650	NA	308.405	268.865	210.586	422.478	393.228	406.715	0.000459142	0.0145793	1
AT3G50650	NA	41.8439	28.4012	14.1438	82.3245	46.4443	93.5339	0.000459119	0.0145793	1
AT1G28570	NA	9.29865	8.52035	3.92884	18.998	24.7703	18.917	0.000463021	0.0146889	1
AT3G06770	NA	102.285	91.8305	76.2196	159.221	145.525	148.183	0.000464322	0.0147031	1
AT4G02770	PSAD-1	11066.9	9635.57	10404.4	14632	14741.4	15529.8	0.000464328	0.0147031	1
AT3G10960	AZG1	72.8395	84.2568	55.0038	113.083	119.723	167.1	0.000470697	0.0148761	1
AT3G16140	PSAH-1	3761.31	3159.16	2970.21	4519.7	4760.02	5458.6	0.000471093	0.0148761	1
AT5G13060	ABAP1	251.064	386.256	370.883	208.977	223.965	112.451	0.000470719	0.0148761	1
AT5G55970	NA	21.6969	38.8149	29.0734	57.8985	54.701	79.8716	0.000473333	0.0149331	1
AT4G39970	NA	327.003	363.535	333.166	474.949	516.047	522.318	0.000477976	0.0150657	1
AT3G51860	CAX3	7.74888	14.2006	7.85769	0	3.09628	2.10189	0.000478742	0.015076	1
AT1G05850	POM1	2053.45	1960.63	2095.65	2736.61	3130.34	2956.3	0.00048102	0.0151212	1
AT4G03030	NA	176.674	179.874	154.796	272.304	220.868	358.371	0.00048106	0.0151212	1
AT3G62700	ABCC14	709.797	937.239	585.398	980.656	1323.15	1323.14	0.000482222	0.0151438	1
AT5G42680	NA	1.54978	0	1.57154	16.284	4.12838	6.30566	0.000483996	0.0151856	1
AT5G67300	MYBR1	1979.06	2099.79	2837.41	1732.43	1339.66	1324.19	0.000486702	0.0152565	1
AT5G63920	TOP3A	471.132	552.876	528.822	360.961	354.009	335.251	0.000489816	0.0153401	1
AT5G45780	NA	292.908	341.761	297.806	246.973	153.782	117.706	0.000492116	0.0153981	1
AT1G09023	NA	133.281	158.905	126.509	220.738	201.248	255.253	0.00049625	0.0155132	1
AT1G75150	NA	240.215	372.055	274.233	190.884	195.066	125.062	0.00049789	0.0155503	1
AT3G26490	NA	30.9955	13.2539	14.9296	43.4239	42.3159	50.4452	0.000499752	0.0155943	1
AT5G22880	HTB2	4545.49	4911.51	4721.68	3641.27	2957.98	3111.84	0.000503094	0.0156843	1
AT4G13560	UNE15	18.5973	5.68024	17.2869	32.5679	49.5406	32.5792	0.000505261	0.0157375	1
AT3G57490	NA	406.041	483.767	457.317	318.442	295.179	295.315	0.00050637	0.0157577	1
AT2G30370	CHAL	77.4888	72.8964	45.5746	33.4726	24.7703	32.5792	0.000507867	0.01579	1
AT3G59480	NA	10.8484	9.46706	7.85769	39.8052	11.353	64.1075	0.000508855	0.0158064	1
AT1G16630	NA	959.311	1033.8	987.711	668.547	765.814	546.49	0.000509723	0.0158076	1
AT4G04490	CRK36	0	0	0	8.14198	2.06419	4.20377	0.000509818	0.0158076	1
AT1G29200	NA	0	0	0	9.95131	3.09628	2.10189	0.000512251	0.0158687	1
AT1G09750	NA	5921.69	5832.66	4841.12	7246.36	7847.02	10821.6	0.000514519	0.0159245	1
AT2G37678	FHY1	75.939	69.1095	71.505	120.32	113.53	133.47	0.000517543	0.0160036	1
AT5G63020	NA	100.735	113.605	108.436	140.223	206.419	208.087	0.000518233	0.0160105	1
AT3G23990	HSP60	3807.8	3552.04	3950.06	2666.05	2792.85	2292.11	0.00052083	0.0160763	1
AT1G19830	NA	24.7964	17.0407	24.3588	4.52332	7.22466	10.5094	0.000523855	0.0161551	1
ATCG00330	RPS14	557.919	238.57	221.587	808.77	561.46	686.266	0.000526006	0.0162068	1
AT1G59740	NA	6.1991	10.4138	11.0008	28.9493	18.5777	28.3754	0.000526535	0.0162086	1
AT1G07720	KCS3	364.197	258.451	282.877	392.624	647.123	467.669	0.000528371	0.0162449	1
AT3G56070	ROC2	1095.69	1041.38	1215.58	840.433	770.975	569.611	0.000528662	0.0162449	1
AT2G33170	NA	181.324	228.156	177.584	269.59	319.949	327.894	0.00052917	0.0162459	1
AT1G66810	NA	3.09955	5.68024	9.42923	16.284	15.4814	29.4264	0.000533137	0.016353	1
AT3G49940	LBD38	201.471	188.394	186.227	291.302	267.313	317.385	0.000535593	0.0164137	1
AT5G28770	BZO2H3	585.815	555.716	524.894	814.198	690.471	1330.49	0.000537074	0.0164443	1
AT2G39230	LOJ	55.7919	74.7898	58.9327	37.9959	29.9308	28.3754	0.000538046	0.0164561	1
AT5G10390	NA	626.109	925.878	857.274	539.18	558.363	333.149	0.000538417	0.0164561	1
AT2G21800	EME1A	100.735	114.551	121.008	65.1358	73.2787	49.3943	0.000539672	0.0164797	1
AT1G79150	NA	702.048	920.198	858.06	540.989	619.257	465.568	0.00054232	0.0165458	1
AT4G10340	LHCB5	27018.8	22178.5	26958.2	33791	39605.6	38682	0.000543016	0.0165523	1
AT1G65150	NA	46.4933	82.3634	88.7919	31.6633	35.0912	37.8339	0.000547918	0.0166869	1
AT3G02040	SRG3	46.4933	90.8838	81.72	132.986	110.434	252.226	0.000548856	0.0167006	1
AT3G12280	RBR1	891.121	1183.38	1173.15	570.843	874.184	485.535	0.000549497	0.0167053	1
AT4G33150	NA	38.7444	48.282	37.7169	81.4198	61.9257	119.807	0.000550125	0.0167096	1
AT5G63550	NA	1394.8	1511.89	1692.55	1092.83	1097.12	679.96	0.000552703	0.016773	1
AT5G53200	TRY	24.7964	32.188	20.43	4.52332	10.3209	12.6113	0.000553472	0.0167815	1
AT5G18170	GDH1	229.367	194.075	199.585	346.486	240.478	766.137	0.000554663	0.0168027	1
AT3G28560	NA	6.1991	6.62694	10.215	2.71399	0	0	0.000556122	0.016832	1
AT3G09030	NA	82.1381	77.6299	85.6488	127.558	133.14	148.183	0.000556653	0.0168332	1
AT5G16970	AER	190.622	190.288	154.011	216.215	323.046	361.524	0.000557242	0.0168362	1
AT4G00750	NA	63.5408	60.5892	49.5034	86.8478	117.659	110.349	0.0005587	0.0168654	1
AT1G17750	PEPR2	74.3892	56.8024	65.2188	37.9959	34.0591	29.4264	0.000560749	0.0169123	1
AT5G43070	WPP1	297.557	336.081	290.734	210.787	215.708	179.711	0.000561361	0.0169159	1
AT4G12970	STOMAGEN	168.926	170.407	148.51	244.259	241.51	262.736	0.000563426	0.0169632	1
AT1G52230	PSAH2	5326.58	4402.18	4552.74	6601.34	7019.28	7105.42	0.000566494	0.0170384	1
ATCG00430	PSBG	1089.49	657.961	1001.86	1338.9	1552.27	1476.57	0.000566919	0.0170384	1
AT1G07870	NA	136.38	133.486	189.37	101.322	77.4071	83.0245	0.000568429	0.0170539	1
AT5G17880	CSA1	229.367	179.874	176.798	255.115	314.789	377.288	0.000568078	0.0170539	1
AT1G55120	FRUCT5	13.948	16.094	24.3588	37.9959	38.1875	46.2415	0.000572187	0.0171516	1
AT3G18630	UNG	55.7919	63.4293	73.0765	30.7586	40.2517	27.3245	0.000576256	0.0172585	1
AT3G10200	NA	213.869	227.209	183.87	130.272	119.723	140.826	0.000576993	0.0172628	1
AT4G37870	PCK1	2118.54	1901.93	2099.57	2941.06	2640.1	3432.38	0.000577409	0.0172628	1
AT5G15550	NA	629.209	718.55	685.976	513.849	459.282	376.237	0.000579741	0.0173174	1
AT2G28410	NA	61.991	77.6299	61.29	91.3711	141.397	143.979	0.000582943	0.0173976	1
AT3G58660	NA	1613.32	1696.5	2003.71	1359.71	1166.27	968.969	0.000583441	0.0173976	1
AT5G48900	NA	189.073	226.263	209.8	313.919	329.238	299.519	0.000584443	0.0174123	1
AT1G65230	NA	266.561	286.852	271.876	395.338	397.357	420.377	0.000586134	0.0174387	1
AT5G45460	NA	7.74888	9.46706	12.5723	20.8073	28.8987	29.4264	0.000586345	0.0174387	1
AT3G21055	PSBTN	5824.06	4786.55	4316.23	7426.39	6887.17	7879.97	0.000586896	0.0174399	1
AT1G17060	CYP72C1	7.74888	16.094	19.6442	44.3286	33.027	31.5283	0.000591233	0.0175514	1
AT5G53290	CRF3	240.215	198.808	231.802	166.458	102.177	128.215	0.000591672	0.0175514	1
AT3G19900	NA	148.778	163.78	159.511	218.929	252.863	260.634	0.000594643	0.0176243	1
AT3G19030	NA	607.512	503.648	562.61	1052.12	714.21	814.481	0.000596479	0.0176634	1
AT1G11800	NA	136.38	162.833	179.155	102.227	103.209	65.1584	0.000598627	0.0177117	1
AT3G59340	NA	21.6969	8.52035	24.3588	38.9006	45.4122	49.3943	0.000599711	0.0177285	1
AT1G55850	CSLE1	69.7399	48.282	59.7184	83.2291	111.466	182.864	0.000602301	0.0177897	1
AT4G25780	NA	3.09955	7.57365	0	10.856	15.4814	27.3245	0.000603459	0.0178085	1
AT2G15890	MEE14	1218.12	1254.39	571.254	2207.38	1197.23	3296.81	0.000604062	0.017811	1
AT3G26890	NA	407.591	338.921	330.809	498.47	500.566	651.584	0.000604709	0.0178147	1
AT1G12900	GAPA-2	5830.26	5019.44	6044.13	7439.05	10083.6	7889.43	0.000608459	0.0179098	1
AT4G28720	YUC8	3.09955	9.46706	16.5011	28.0446	50.5726	21.0189	0.000609754	0.0179325	1
AT1G51405	NA	83.6879	88.0437	95.078	146.556	138.301	151.336	0.000610604	0.0179421	1
AT3G19800	NA	220.068	168.514	179.941	278.637	271.441	338.404	0.000611221	0.0179449	1
AT3G16220	NA	23.2466	20.8275	21.2158	46.1379	39.2196	49.3943	0.000613705	0.0180024	1
AT4G31360	NA	531.573	461.046	608.971	422.478	295.179	209.138	0.000618163	0.0181176	1
AT1G16820	NA	13.948	7.57365	14.9296	34.3772	23.7382	33.6302	0.000619357	0.0181319	1
AT1G21010	NA	154.978	106.031	106.079	187.266	189.905	249.073	0.000619712	0.0181319	1
AT2G46330	AGP16	945.363	805.647	739.408	1271.96	1047.58	1484.98	0.000620237	0.0181319	1
AT5G04140	GLU1	4074.36	4773.29	4449.02	5133.97	8320.75	7403.89	0.000621304	0.0181476	1
AT4G30860	SDG4	314.604	301.053	343.381	225.261	214.676	200.73	0.000626574	0.0182859	1
AT1G52930	NA	750.091	788.606	999.498	569.034	613.064	500.249	0.000632722	0.0184026	1
AT1G76100	PETE1	2169.69	1813.89	1962.85	2892.21	2606.04	3219.04	0.000632225	0.0184026	1
AT2G37880	NA	43.3937	29.3479	29.0734	9.04664	20.6419	6.30566	0.00063267	0.0184026	1
AT4G33905	NA	15.4978	17.0407	22.0015	2.71399	9.28885	5.25471	0.000632256	0.0184026	1
AT3G14890	NA	550.17	589.798	584.612	395.338	435.544	290.06	0.000634181	0.0184294	1
AT1G09440	NA	29.4457	36.9215	44.0031	73.2778	62.9578	74.6169	0.000636998	0.0184809	1
AT1G31330	PSAF	21332.7	18796.8	18313.1	26136.7	27433.1	31572.4	0.000637571	0.0184809	1
AT4G17900	NA	139.48	164.727	144.581	272.304	179.585	321.588	0.000637543	0.0184809	1
AT1G10690	NA	41.8439	34.0814	24.3588	56.9939	71.2145	70.4132	0.000640528	0.018551	1
AT3G06080	TBL10	368.847	337.974	315.879	449.618	493.341	609.547	0.000651298	0.018831	1
AT5G20050	NA	105.385	82.3634	99.0069	157.412	145.525	168.151	0.000650969	0.018831	1
AT1G04240	SHY2	15.4978	25.5611	20.43	65.1358	44.3801	34.6811	0.000655018	0.0189067	1
AT3G61210	NA	0	1.89341	0	12.6653	8.25676	2.10189	0.000654869	0.0189067	1
AT2G36010	E2F3	227.817	264.131	242.803	145.651	184.745	99.8395	0.000657195	0.0189536	1
AT5G39240	NA	35.6448	39.7617	19.6442	7.23731	11.353	15.7641	0.000657852	0.0189565	1
AT4G35050	MSI3	595.114	426.018	442.388	376.34	249.767	278.5	0.000660764	0.0190244	1
AT5G50930	NA	41.8439	57.7491	53.4323	27.1399	28.8987	18.917	0.000663301	0.0190815	1
AT2G19910	NA	83.6879	70.0562	58.9327	33.4726	43.348	31.5283	0.000664128	0.0190892	1
AT4G24026	NA	0	1.89341	0	4.52332	4.12838	14.7132	0.000665667	0.0191174	1
AT4G33470	HDA14	266.561	216.796	202.728	386.292	334.399	326.843	0.000667386	0.0191507	1
AT1G24793	LpxC1	110.468	54.0664	51.5857	14.6917	0	25.8952	0.000668276	0.0191602	1
AT2G23610	MES3	44.9435	46.3886	44.0031	100.418	79.4713	70.4132	0.000669854	0.0191894	1
AT5G18020	SAUR20	0	0	0	5.42799	5.16047	2.10189	0.000672107	0.0192379	1
AT3G61870	NA	1594.72	1489.17	1393.95	1914.27	2286.09	2322.58	0.000674949	0.0193031	1
AT5G04500	NA	9.29865	6.62694	7.07192	1.80933	1.03209	0	0.000680391	0.0194425	1
AT2G18440	NA	590.465	956.173	743.337	1203.2	948.495	2232.2	0.000681313	0.0194526	1
AT5G08180	NA	1359.15	1608.45	1674.47	1143.5	1071.31	678.909	0.000684507	0.0195275	1
AT2G37210	LOG3	100.735	82.3634	76.2196	54.2799	14.4493	35.732	0.000694938	0.0198086	1
AT5G65110	ACX2	574.967	466.726	522.536	675.784	724.531	1303.17	0.000695673	0.0198131	1
AT2G26500	NA	1875.23	1501.48	1522.03	2343.99	2309.83	2485.48	0.00069627	0.0198136	1
AT5G22650	HD2B	3700.86	4106.81	4697.33	2922.07	3087	2394.05	0.000697256	0.0198252	1
AT1G78110	NA	26.3462	15.1473	10.215	36.1866	39.2196	45.1905	0.000699814	0.0198815	1
AT1G52220	NA	1255.32	1120.9	1092.22	1690.82	1621.42	1659.44	0.000701981	0.0199182	1
AT2G34070	TBL37	66.6404	80.47	64.433	176.41	102.177	118.757	0.000702518	0.0199182	1
AT5G64630	FAS2	179.774	211.115	207.443	124.844	138.301	69.3622	0.000702852	0.0199182	1
AT1G24100	UGT74B1	305.306	334.187	374.812	199.931	264.216	145.03	0.000706409	0.0199437	1
AT1G75550	NA	7.74888	12.3072	2.35731	24.4259	17.5456	28.3754	0.000705382	0.0199437	1
AT3G57150	NAP57	4176.65	4477.92	5693.68	3586.99	3189.17	2530.67	0.000705174	0.0199437	1
AT4G09650	ATPD	4156.5	3685.53	3925.7	5243.43	5978.93	5641.46	0.000706518	0.0199437	1
AT4G25340	FKBP53	1487.78	1467.39	1844.2	1149.83	1147.69	760.882	0.000706661	0.0199437	1
AT2G24280	NA	283.609	352.175	310.379	396.243	462.379	829.194	0.00070957	0.0200093	1
AT1G24600	NA	0	0	0	7.23731	3.09628	3.15283	0.000716321	0.0201665	1
AT5G19260	FAF3	187.523	160.94	150.082	81.4198	110.434	106.145	0.000716286	0.0201665	1
AT1G32060	PRK	4884.89	4534.72	4604.61	5882.13	7173.06	7263.06	0.000717575	0.0201852	1
AT3G52910	GRF4	370.396	419.391	377.955	559.083	523.272	641.075	0.000723295	0.0203294	1
AT4G17860	NA	7.74888	12.3072	10.215	23.5213	29.9308	23.1207	0.000726765	0.0204102	1
AT2G36792	NA	46.4933	24.6144	18.8585	80.5151	52.6368	69.3622	0.000729295	0.020458	1
AT3G60670	NA	55.7919	38.8149	59.7184	23.5213	5.16047	25.2226	0.000729663	0.020458	1
AT5G64410	OPT4	330.102	273.598	268.733	344.677	492.309	560.152	0.000731068	0.0204807	1
AT2G33750	PUP2	0	0.946706	1.57154	7.23731	6.19257	6.30566	0.000734098	0.020532	1
AT3G14150	HAOX2	274.31	250.877	198.8	397.148	329.238	383.594	0.000734054	0.020532	1
AT2G23290	MYB70	435.487	462.939	576.754	389.006	270.409	274.296	0.000734889	0.0205373	1
AT4G38660	NA	1377.75	1487.28	1519.68	1043.08	1070.28	945.848	0.000736428	0.0205636	1
AT1G25275	NA	839.978	537.729	337.881	1510.79	658.477	1495.49	0.000742441	0.0207146	1
AT4G03190	GRH1	294.457	230.05	275.019	499.375	342.655	405.664	0.000744374	0.0207516	1
AT1G14060	NA	313.055	317.147	377.955	265.971	171.328	191.272	0.0007484	0.0208469	1
AT1G23080	PIN7	299.107	454.419	312.736	466.807	539.786	872.282	0.000751591	0.0208624	1
AT2G33175	NA	4.64933	1.89341	6.28615	0	0	0	0.000751986	0.0208624	1
AT3G21100	NA	368.847	355.015	380.312	251.497	274.537	211.239	0.000751302	0.0208624	1
AT3G62650	NA	356.448	290.639	271.09	550.036	349.88	630.566	0.000751337	0.0208624	1
AT4G01270	NA	167.376	172.3	187.013	127.558	105.274	76.7188	0.000752611	0.0208624	1
AT4G37330	CYP81D4	401.392	401.403	425.887	539.18	644.027	611.649	0.000752155	0.0208624	1
AT2G26570	WEB1	419.989	387.203	388.956	551.845	536.689	687.316	0.000754908	0.0209092	1
AT2G33830	NA	1184.03	1047.06	110.008	4150.6	662.605	9443.77	0.000756579	0.0209386	1
AT1G71880	SUC1	336.301	321.88	363.025	494.851	420.063	911.167	0.000759861	0.0210124	1
AT1G18250	ATLP-1	1194.88	1289.41	1496.1	897.427	1015.58	745.118	0.000763474	0.0210953	1
AT3G51060	STY1	55.7919	47.3353	46.3604	97.7037	74.3108	95.6358	0.000768953	0.0212296	1
AT4G17720	NA	481.98	530.155	617.614	407.099	357.105	319.487	0.000772923	0.021322	1
AT1G03320	NA	0	0.946706	0	4.52332	12.3851	2.10189	0.000774462	0.0213376	1
AT3G55580	NA	24.7964	22.7209	22.7873	2.71399	12.3851	9.45848	0.000774736	0.0213376	1
AT4G31530	NA	384.344	317.147	300.164	498.47	480.956	500.249	0.000780044	0.0214457	1
AT5G07440	GDH2	375.046	316.2	281.305	530.133	283.826	3004.64	0.000780537	0.0214457	1
AT5G45350	NA	278.96	285.905	361.454	245.164	158.943	156.59	0.000779745	0.0214457	1
AT1G27520	NA	151.878	175.141	123.366	251.497	198.162	300.57	0.000781241	0.0214478	1
AT4G23820	NA	1024.4	1036.64	915.421	1459.22	1343.79	1456.61	0.000783738	0.0214992	1
AT5G17860	CAX7	0	0	0	1.80933	9.28885	3.15283	0.000784942	0.021515	1
AT1G72060	NA	3.09955	0.946706	2.35731	8.14198	9.28885	12.6113	0.000789248	0.0216157	1
AT3G09050	NA	251.064	267.918	282.091	380.864	410.774	381.492	0.000790181	0.0216239	1
AT1G02305	NA	412.24	356.908	324.523	524.705	489.213	635.82	0.000794067	0.0216956	1
AT2G41450	NA	100.735	99.4041	106.865	57.8985	69.1504	34.6811	0.000793883	0.0216956	1
AT1G16705	NA	10.8484	3.78682	3.92884	0	1.03209	0	0.000796391	0.0217418	1
AT4G22540	ORP2A	511.426	543.409	495.82	741.825	704.921	784.003	0.000797813	0.0217547	1
AT5G59730	EXO70H7	1421.14	1571.53	1528.32	1159.78	1007.32	970.02	0.000798134	0.0217547	1
AT1G24400	LHT2	32.5453	33.1347	43.2173	57.8985	66.0541	98.7886	0.000798903	0.0217584	1
AT5G21222	NA	542.422	601.158	548.467	759.013	815.355	863.875	0.000800942	0.0217966	1
AT5G02240	NA	3660.57	3589.91	2894.77	2680.52	1871.19	2121.85	0.000805153	0.0218938	1
AT2G03730	ACR5	86.7874	102.244	117.865	146.556	193.002	173.406	0.000809056	0.0219825	1
AT5G14780	FDH	71.2897	69.1095	43.2173	133.89	81.5355	161.845	0.00081144	0.0220297	1
AT5G07020	NA	812.083	954.28	791.269	1105.5	1260.19	1389.35	0.000814476	0.0220947	1
AT5G42530	NA	9.29865	0	0	65.1358	10.3209	17.866	0.000816502	0.0221321	1
AT3G51030	TRX1	35.6448	36.9215	34.5738	110.369	54.701	64.1075	0.000819277	0.0221898	1
AT1G29160	NA	17.0475	17.0407	14.1438	44.3286	27.8666	35.732	0.00082352	0.0222871	1
AT1G15080	LPP2	145.679	189.341	132.795	110.369	81.5355	72.515	0.000828618	0.0224073	1
AT5G18240	MYR1	0	3.78682	1.57154	18.998	4.12838	10.5094	0.00083444	0.022547	1
AT5G10190	NA	94.5363	83.3101	80.9342	152.888	115.595	179.711	0.000837021	0.0225989	1
AT1G27670	NA	0	0	0	1.80933	4.12838	7.3566	0.000842367	0.0227253	1
AT2G28190	CSD2	3615.63	2556.11	2003.71	4859.86	4013.82	4293.1	0.000848462	0.0228718	1
AT5G14180	MPL1	0	0.946706	1.57154	2.71399	8.25676	9.45848	0.000852216	0.0229549	1
AT1G07040	NA	89.887	107.924	61.29	139.318	120.755	367.83	0.0008584	0.0230734	1
AT3G44750	HDA3	1861.28	1946.43	2442.96	1554.21	1439.77	1009.96	0.000858636	0.0230734	1
AT5G06590	NA	156.527	134.432	98.2211	73.2778	62.9578	79.8716	0.000857938	0.0230734	1
AT1G08380	PSAO	11178.5	8560.12	9302.72	15573.8	12558.5	14719.5	0.000866378	0.0232268	1
AT1G78130	UNE2	23.2466	33.1347	29.8592	53.3752	47.4764	79.8716	0.000865864	0.0232268	1
AT3G53940	NA	122.432	181.768	143.796	93.1804	92.8885	76.7188	0.000865765	0.0232268	1
AT4G27990	YLMG1-2	168.926	104.138	145.367	180.028	244.606	323.69	0.000868225	0.0232581	1
AT1G50590	NA	0	0	3.14308	4.52332	11.353	7.3566	0.000871168	0.0233187	1
AT5G65120	NA	179.774	183.661	219.23	109.464	143.461	106.145	0.000873326	0.0233582	1
AT4G16690	MES16	86.7874	59.6425	53.4323	113.988	121.787	116.655	0.000878133	0.0234685	1
AT1G59910	NA	635.408	609.679	578.326	454.141	425.223	369.932	0.000879693	0.0234918	1
AT1G09470	NA	438.587	469.566	485.605	319.347	346.784	292.162	0.000885787	0.0235466	1
AT4G04640	ATPC1	4415.31	4740.16	4718.54	5580.87	7699.43	7116.98	0.000885977	0.0235466	1
AT4G37810	NA	18.5973	40.7084	25.9304	11.7606	11.353	9.45848	0.000884757	0.0235466	1
AT5G41060	NA	198.371	192.181	157.94	256.925	262.152	333.149	0.000884881	0.0235466	1
AT5G42050	NA	2036.41	2379.07	2291.3	1736.96	1409.84	1478.68	0.000886556	0.0235466	1
AT5G43830	NA	1639.66	1258.17	1277.66	1948.65	1766.95	3843.3	0.00088416	0.0235466	1
AT5G43990	SUVR2	354.899	364.482	369.311	237.022	243.574	264.838	0.000883742	0.0235466	1
AT1G54385	NA	664.854	896.531	883.99	526.515	627.514	417.224	0.000891095	0.0236447	1
AT2G01670	NUDT17	505.227	665.534	539.037	838.624	782.328	901.709	0.000891626	0.0236447	1
AT5G16490	RIC4	1.54978	1.89341	0	9.95131	4.12838	8.40754	0.000901298	0.0238827	1
AT4G28080	NA	5994.53	6752.85	6246.08	7384.77	11251.9	10097.5	0.000905421	0.0239734	1
AT5G28050	NA	567.218	532.049	537.466	696.592	761.686	986.835	0.000914287	0.0241894	1
AT1G76250	NA	0	1.89341	3.92884	6.33265	13.4172	10.5094	0.000915204	0.024195	1
AT4G02520	GSTF2	27.896	37.8682	6.28615	66.0405	47.4764	182.864	0.000915993	0.0241972	1
AT3G07320	NA	1820.99	2130.09	1916.49	1378.71	1499.63	1058.3	0.000918071	0.0242334	1
AT2G01590	CRR3	252.613	204.489	233.373	312.109	352.976	364.677	0.000922258	0.0243252	1
AT5G46490	NA	7.74888	2.84012	0.785769	10.856	18.4951	13.6623	0.00093112	0.02454	1
AT3G02920	RPA32B	244.865	313.36	308.807	170.077	226.029	130.317	0.000939367	0.0247004	1
AT3G55630	DFD	251.064	177.981	212.943	344.677	319.949	311.079	0.000939072	0.0247004	1
AT4G18740	NA	48.043	26.5078	63.6473	98.6084	93.9206	90.3811	0.000937938	0.0247004	1
AT4G26070	MEK1	49.5928	45.4419	29.0734	81.4198	66.0541	92.4829	0.000943328	0.0247855	1
AT3G03110	XPO1B	478.881	559.503	527.251	303.063	425.223	297.417	0.000948322	0.0248976	1
AT4G00340	RLK4	362.648	393.83	315.879	521.087	487.149	568.56	0.000951498	0.0249359	1
AT5G46050	PTR3	6.1991	12.3072	1.57154	22.6166	17.5456	26.2736	0.000951448	0.0249359	1
ATCG00170	RPOC2	271.211	193.128	287.591	365.484	411.806	380.441	0.000951962	0.0249359	1
AT1G67740	PSBY	6967.79	6433.81	6072.42	8477.61	9409.61	9885.17	0.000956238	0.0250287	1
AT5G59220	HAI1	63.5408	59.6425	120.223	30.7586	46.4443	33.6302	0.000960043	0.0251092	1
AT1G15125	NA	91.4368	54.9089	18.0727	191.789	56.7652	376.237	0.000961775	0.0251353	1
AT3G48540	NA	99.1857	91.8305	94.2923	50.6612	66.0541	45.1905	0.000962834	0.0251438	1
AT3G10040	NA	308.405	268.865	185.441	179.124	131.076	67.2603	0.000963732	0.0251481	1
AT5G42060	NA	116.233	85.2035	84.0773	58.8032	47.4764	51.4962	0.000966277	0.0251953	1
AT1G52910	NA	52.6924	80.47	67.5761	113.988	147.59	101.941	0.000967997	0.0252209	1
AT3G47380	NA	119.333	107.924	127.295	159.221	189.905	231.207	0.000975528	0.0253978	1
AT1G63800	UBC5	156.527	103.191	103.721	220.738	148.622	325.792	0.000977347	0.0254066	1
AT5G59330	NA	102.285	74.7898	156.368	61.5172	36.1233	9.45848	0.000976666	0.0254066	1
AT5G52190	NA	40.2942	23.6677	15.7154	68.7545	47.4764	59.9037	0.000982065	0.0255099	1
AT2G34190	NA	536.222	733.697	596.399	413.432	466.507	267.99	0.000983946	0.0255394	1
AT1G19670	CLH1	413.79	272.651	358.311	219.833	250.799	182.864	0.000988742	0.0256444	1
AT2G29260	NA	34.0951	53.9622	47.1461	22.6166	21.674	22.0698	0.000991485	0.0256767	1
AT2G40435	NA	17.0475	14.2006	8.64346	25.3306	33.027	35.732	0.000990834	0.0256767	1
AT4G23340	NA	17.0475	2.84012	3.14308	0	1.03209	0	0.000993417	0.0257001	1
AT5G16110	NA	681.901	569.917	581.469	864.859	752.397	1479.73	0.00099389	0.0257001	1
AT5G16570	GLN1;4	1.54978	0	0	4.52332	5.16047	9.45848	0.00100516	0.0259523	1
AT5G20630	GER3	7046.83	9074.18	3723.76	13186.4	9432.32	13799.9	0.00100462	0.0259523	1
AT5G51780	NA	0	0	0	7.23731	1.03209	5.25471	0.00100648	0.0259669	1
AT4G30975	NA	7.74888	3.78682	7.07192	14.4746	17.5456	22.0698	0.00100976	0.0260318	1
AT1G59359	NA	0	0	0	0	8.31868	8.62824	0.00101263	0.0260861	1
AT1G58684	NA	0	0	0	0	8.31868	8.62824	0.00101356	0.0260907	1
AT5G52950	NA	164.276	224.369	225.516	123.939	142.429	66.2094	0.00101715	0.0261633	1
AT4G28590	MRL7	444.786	417.497	431.387	268.685	324.078	297.417	0.00102997	0.0264732	1
AT3G48320	CYP71A21	0	3.78682	0	8.14198	9.28885	7.3566	0.00103452	0.0265702	1
AT3G49080	NA	979.458	993.095	1106.36	701.115	789.553	652.635	0.00104309	0.0267522	1
AT4G37210	NA	937.614	978.894	1041.14	650.454	769.943	636.871	0.00104317	0.0267522	1
AT5G05440	PYL5	66.6404	34.0814	86.4346	153.793	79.4713	228.055	0.00104405	0.0267548	1
AT3G11090	LBD21	27.896	17.9874	37.7169	80.5151	47.4764	56.7509	0.00104713	0.0268138	1
AT4G32460	NA	423.089	494.181	484.034	290.397	365.362	172.355	0.00104867	0.0268331	1
AT1G74055	NA	7.74888	5.68024	14.9296	25.3306	21.674	27.3245	0.0010517	0.0268905	1
AT1G13650	NA	72.8395	52.0688	75.4338	112.178	298.275	88.2792	0.00105385	0.0269055	1
AT1G66100	NA	0	0	0	4.52332	3.09628	4.20377	0.00105318	0.0269055	1
AT2G30740	NA	263.462	232.89	233.373	390.815	378.779	313.181	0.00106082	0.0270632	1
AT5G28460	NA	392.233	482.763	441.806	340.118	265.899	278.363	0.00106477	0.0271437	1
AT2G24180	CYP71B6	82.1381	88.9904	95.8638	130.272	188.873	135.572	0.00106769	0.0271777	1
AT3G54870	MRH2	41.8439	53.9622	34.5738	25.3306	19.6098	14.7132	0.00106759	0.0271777	1
AT2G39350	ABCG1	261.912	266.024	332.38	208.073	193.002	155.54	0.00106996	0.0272152	1
AT1G26290	NA	0	0	0	10.856	1.03209	3.15283	0.00107129	0.0272286	1
AT5G06800	NA	0	0	0	3.61866	5.16047	3.15283	0.00107207	0.0272286	1
AT5G51070	ERD1	195.272	204.489	186.227	255.115	273.505	443.498	0.00107485	0.0272788	1
AT4G36680	NA	444.786	472.406	534.323	310.3	379.811	284.805	0.00107616	0.0272919	1
AT3G15630	NA	934.515	933.452	516.25	1596.73	784.392	3293.65	0.00108185	0.0274005	1
AT4G25690	NA	99.1857	107.924	110.793	199.931	140.365	178.66	0.00108204	0.0274005	1
AT2G46550	NA	888.022	785.766	806.199	1130.83	1071.31	1436.64	0.0010874	0.0274754	1
AT3G05500	NA	502.127	577.491	609.757	418.86	395.292	336.302	0.00108685	0.0274754	1
ATCG00420	NDHJ	154.978	164.727	249.089	221.643	386.003	406.715	0.00108606	0.0274754	1
AT1G05840	NA	114.683	114.551	88.7919	145.651	168.231	231.207	0.00109283	0.0275921	1
AT3G01690	NA	450.985	408.03	402.314	688.45	477.86	812.379	0.00109836	0.0276712	1
AT3G48530	KING1	402.942	338.921	370.883	501.184	479.924	828.143	0.00109838	0.0276712	1
AT3G56650	PPD6	416.89	393.83	378.741	570.843	520.176	629.515	0.00109774	0.0276712	1
AT1G58290	HEMA1	3759.76	3036.09	4056.14	4765.77	5908.74	5273.63	0.0011023	0.0277378	1
AT2G31800	NA	268.111	230.05	207.443	354.628	291.051	503.401	0.00110265	0.0277378	1
AT1G78230	NA	34.0951	37.8682	40.0742	47.0425	134.172	80.9226	0.00110513	0.0277392	1
AT2G19400	NA	43.3937	42.6018	56.5754	85.0384	85.6639	81.9735	0.00110412	0.0277392	1
AT5G13820	TBP1	17.0475	15.1473	9.42923	45.2332	31.9949	24.1717	0.00110474	0.0277392	1
AT5G01530	LHCB4.1	17090.9	14924.8	15084.4	21440.5	21359.2	23981.5	0.00110705	0.027767	1
AT1G20340	DRT112	14028.6	12596.9	12298.1	17532.4	17683.9	19967.9	0.00112054	0.0279936	1
AT1G51060	HTA10	2998.82	3474.41	3425.95	2685.04	2135.4	1804.47	0.00112145	0.0279936	1
AT1G78830	NA	689.65	743.164	535.109	1033.13	768.911	1463.96	0.00112133	0.0279936	1
AT2G34700	NA	32.5453	40.7084	56.5754	28.0446	11.353	12.6113	0.00111952	0.0279936	1
AT2G46720	KCS13	245.825	244.013	217.658	169.326	152.75	145.03	0.00111803	0.0279936	1
AT3G14415	GOX2	2245.63	2304.28	2240.23	3091.24	3293.41	3113.94	0.0011218	0.0279936	1
AT5G27680	RECQSIM	131.731	190.288	155.582	88.6571	113.53	53.5981	0.00112097	0.0279936	1
AT1G49010	NA	195.272	181.768	177.584	295.825	252.863	274.296	0.00112271	0.0279958	1
AT2G28110	FRA8	1.54978	0.946706	0	9.04664	7.22466	5.25471	0.00112587	0.0280542	1
AT1G19310	NA	86.7874	94.6706	50.2892	176.41	106.306	164.998	0.00112945	0.0281231	1
AT2G22600	NA	40.2942	35.9748	41.6457	18.0933	23.7382	14.7132	0.00113204	0.0281669	1
AT2G26740	SEH	111.584	76.6832	86.4346	126.653	171.328	167.1	0.0011342	0.0282003	1
AT5G66900	NA	54.2422	77.6299	83.2915	133.89	111.466	128.215	0.00113837	0.0282834	1
AT1G14920	GAI	543.971	525.422	561.825	664.024	791.617	976.326	0.00114199	0.0283326	1
AT1G69520	NA	1.54978	0.946706	2.35731	5.42799	6.19257	21.0189	0.00114283	0.0283326	1
ATCG00470	ATPE	5710.92	3512.28	4728.76	7602.8	6314.36	7525.8	0.00114259	0.0283326	1
AT1G74740	CPK30	24.7964	29.3479	39.2884	64.2312	54.701	60.9547	0.0011488	0.0284393	1
AT4G33467	NA	0	1.89341	0	6.33265	2.06419	14.7132	0.0011486	0.0284393	1
AT3G04770	RPSAb	212.319	234.783	242.017	134.795	173.392	139.775	0.00115214	0.0284666	1
AT3G48990	AAE3	782.637	662.694	528.037	899.236	952.624	1123.46	0.00115239	0.0284666	1
AT3G51450	NA	111.584	161.887	152.439	106.75	60.8936	56.7509	0.00115095	0.0284666	1
AT5G15630	IRX6	4.64933	4.73353	0	20.8073	6.19257	15.7641	0.00115463	0.0285014	1
AT1G21740	NA	539.322	533.942	553.181	424.288	346.784	349.964	0.00115662	0.0285299	1
AT1G76080	CDSP32	1604.02	1498.64	1449.74	2087.06	2392.4	1999.94	0.00115867	0.0285599	1
AT3G26310	CYP71B35	48.043	28.4012	31.4308	64.2312	83.5997	60.9547	0.00116692	0.028736	1
AT5G44390	NA	1.54978	4.73353	1.57154	9.04664	24.7703	7.3566	0.00116749	0.028736	1
AT5G15950	NA	139.48	125.912	412.529	57.8985	131.076	27.3245	0.00118244	0.029083	1
AT5G25980	TGG2	2536.98	2967.92	2256.73	3099.38	4251.2	4328.83	0.00118373	0.0290939	1
AT5G09430	NA	1.54978	5.68024	4.71461	0	0	0	0.00119097	0.0292508	1
AT1G03940	NA	21.2939	37.5464	78.5769	20.8073	15.4814	7.3566	0.00119429	0.0292699	1
AT1G76420	CUC3	13.948	11.3605	13.3581	5.42799	3.09628	3.15283	0.00119516	0.0292699	1
AT2G35950	EDA12	32.5453	13.2539	34.5738	5.42799	9.28885	11.5604	0.00119514	0.0292699	1
AT4G16950	RPP5	1007.18	1275.74	806.89	1548.24	1604.66	1504.58	0.00119413	0.0292699	1
AT1G20620	CAT3	23108.7	21461.8	14395.3	27303.7	26786	46417	0.00119622	0.029275	1
AT5G18620	CHR17	1405.65	1600.88	1733.41	1043.98	1229.22	1004.7	0.0012109	0.0296131	1
AT3G04710	TPR10	243.315	293.479	384.241	181.838	231.189	136.623	0.00122059	0.0298287	1
AT5G40170	RLP54	113.134	144.846	73.0765	163.744	200.226	225.953	0.00123131	0.0300693	1
AT3G05470	NA	585.815	576.544	633.33	475.853	400.453	338.404	0.0012322	0.0300696	1
AT3G57880	NA	908.169	946.706	1046.64	701.115	728.659	584.324	0.00123891	0.0301904	1
AT5G14730	NA	4.64933	0.946706	0	7.23731	6.19257	14.7132	0.00123826	0.0301904	1
AT1G80310	MOT2	156.527	130.645	95.8638	200.835	205.387	212.29	0.00124182	0.0302398	1
AT5G55920	OLI2	1173.18	1378.4	1424.6	948.088	1005.26	621.107	0.00124349	0.0302588	1
AT3G04060	NAC046	0	0	0	3.61866	2.06419	6.30566	0.0012459	0.030296	1
AT5G63190	NA	638.508	603.998	594.827	813.293	778.2	1269.54	0.00125062	0.0303891	1
AT1G67820	NA	193.722	151.473	152.439	89.5618	113.53	102.992	0.0012547	0.0304667	1
AT1G15670	NA	35.6448	66.2694	48.7177	113.988	63.9899	149.234	0.00125713	0.0305042	1
AT4G20325	NA	241.765	337.974	313.522	210.787	206.419	145.03	0.00126742	0.030732	1
AT2G29360	NA	125.532	173.247	127.295	217.119	254.927	207.036	0.00126875	0.0307426	1
AT1G07270	NA	55.7919	72.8964	48.7177	27.1399	36.1233	10.5094	0.00127835	0.0309531	1
AT3G18730	TSK	227.817	290.639	299.378	156.507	215.708	138.724	0.00128	0.0309712	1
AT2G19670	PRMT1A	406.041	515.955	504.464	313.919	361.233	291.111	0.00128276	0.0310061	1
AT5G02790	GSTL3	395.193	418.444	379.526	567.225	531.529	608.496	0.00128325	0.0310061	1
AT4G16000	NA	0	0	0	1.80933	6.19257	4.20377	0.00128558	0.0310406	1
AT1G03440	NA	102.285	100.351	108.436	153.793	172.36	160.794	0.00129306	0.0311991	1
AT4G29220	PFK1	317.704	305.786	279.734	463.188	427.287	408.817	0.0013027	0.0314097	1
AT1G04180	YUC9	0	0.946706	3.92884	18.998	12.3851	3.15283	0.00130639	0.0314765	1
AT3G52820	PAP22	0	1.89341	0	6.33265	10.3209	3.15283	0.0013186	0.0317448	1
AT3G55660	ROPGEF6	1184.03	1160.66	1281.59	858.526	929.917	757.73	0.00131938	0.0317448	1
AT4G33700	NA	384.344	407.084	308.021	277.732	232.221	216.494	0.00132186	0.0317779	1
AT5G65360	NA	4767.11	5178.48	5047.78	4033.9	3409.01	2540.13	0.00132261	0.0317779	1
AT1G80270	PPR596	715.996	883.277	911.492	634.17	594.487	424.581	0.00133175	0.0318897	1
AT2G18670	NA	94.5363	113.605	87.2203	141.888	153.586	188.865	0.00133011	0.0318897	1
AT4G34610	BLH6	392.093	437.378	486.391	290.397	335.431	169.202	0.00132951	0.0318897	1
AT5G44680	NA	334.752	326.614	285.234	459.569	489.213	418.275	0.00133192	0.0318897	1
AT5G51770	NA	247.964	263.184	216.872	185.456	151.718	119.807	0.00133029	0.0318897	1
AT4G35750	NA	128.631	200.702	121.008	216.215	199.194	595.884	0.00133327	0.0318997	1
AT3G13520	AGP12	193.722	137.272	160.297	423.383	362.265	159.743	0.00133427	0.0319014	1
AT1G56580	SVB	4260.33	3665.65	5556.96	2964.58	3401.78	2328.89	0.00133577	0.0319151	1
AT1G28320	DEG15	283.609	299.159	237.302	421.574	326.142	561.203	0.00133913	0.0319731	1
AT3G63390	NA	348.7	269.811	290.734	222.547	186.809	194.424	0.00134982	0.0322059	1
AT2G31940	NA	3.09955	7.57365	2.35731	15.3793	11.353	16.8151	0.00135175	0.0322295	1
AT1G12080	NA	74.3892	60.5892	51.8607	139.318	70.1825	186.017	0.00135329	0.0322438	1
AT5G47040	LON2	863.225	854.876	916.992	1055.74	1277.73	1549.09	0.00135802	0.032334	1
AT3G59110	NA	522.274	512.168	458.889	671.261	684.279	777.698	0.00136263	0.0324212	1
AT5G18140	NA	327.003	274.545	266.376	420.669	359.169	566.458	0.00137668	0.0327327	1
AT4G18570	NA	1176.28	1051.79	1147.22	800.628	840.125	756.679	0.00138264	0.0328517	1
AT2G39360	NA	71.2897	80.47	59.7184	110.369	129.012	113.502	0.00138494	0.0328607	1
AT4G21215	NA	12.3982	17.0407	9.42923	22.6166	33.027	36.783	0.00138445	0.0328607	1
AT1G02610	NA	1.54978	3.78682	3.14308	14.4746	2.06419	53.5981	0.00139103	0.0329458	1
AT4G08910	NA	30.9955	21.7742	15.7154	1.80933	11.353	8.40754	0.00139141	0.0329458	1
AT5G61810	APC1	370.396	549.089	443.174	328.393	311.693	187.068	0.0013905	0.0329458	1
AT5G66640	DAR3	0	0	0	9.04664	2.06419	2.10189	0.00139509	0.03301	1
AT5G46870	NA	51.1426	48.282	53.4323	27.1399	29.9308	25.2226	0.0013998	0.0330986	1
AT4G03560	TPC1	1008.9	929.665	930.35	1157.07	1377.85	1679.41	0.00140606	0.0332238	1
AT4G36040	J11	1780.69	2228.55	2165.58	3156.37	2427.49	3741.36	0.00141515	0.0334156	1
AT5G06250	DPA4	7.74888	20.8275	20.43	2.71399	3.09628	8.40754	0.00141993	0.0335053	1
AT1G15350	NA	88.3372	58.6958	58.1469	112.178	107.338	137.673	0.00142755	0.033662	1
AT3G50820	PSBO2	4331.62	3946.82	4607.75	5190.96	6896.46	6552.63	0.00143183	0.0337396	1
AT1G23020	FRO3	21.6969	24.6144	10.215	43.4239	30.9628	67.2603	0.00143464	0.0337825	1
AT3G49530	NAC062	1160.78	1394.5	1283.16	986.084	756.526	913.269	0.00143575	0.0337855	1
AT3G23820	GAE6	1202.63	1500.53	1167.65	1723.39	2131.28	1785.55	0.0014375	0.0338035	1
AT1G55180	PLDEPSILON	0	0	0	0	12.3851	5.25471	0.00144679	0.0339753	1
AT3G62110	NA	168.926	231.943	182.298	278.637	274.537	341.556	0.0014464	0.0339753	1
AT4G35630	PSAT	1030.6	1075.46	1082.79	816.912	764.782	673.654	0.0014559	0.0341659	1
AT1G33250	NA	275.86	276.438	265.59	351.01	372.586	511.809	0.00146589	0.0343766	1
AT1G61170	NA	72.8395	85.2035	91.935	144.746	113.53	158.692	0.00147149	0.0344844	1
AT3G49210	NA	0	0.946706	0.785769	3.61866	6.19257	8.40754	0.00147396	0.0345187	1
AT2G47240	LACS1	3538.14	4057.58	4421.52	2302.37	2992.04	2962.61	0.00147605	0.0345205	1
AT3G24460	NA	4.64933	7.57365	7.85769	19.9026	19.6098	15.7641	0.00147598	0.0345205	1
AT1G10980	NA	9.29865	7.57365	25.9304	0.904664	5.16047	3.15283	0.00147793	0.0345409	1
AT1G09740	NA	75.939	53.9622	47.1461	103.132	85.6639	145.03	0.0014849	0.0346606	1
AT1G56190	NA	1078.64	1032.86	963.353	1527.98	1383.01	1399.86	0.00148508	0.0346606	1
AT5G24530	DMR6	72.8395	30.2946	17.2869	99.5131	70.1825	160.794	0.00148776	0.0346995	1
AT5G25250	FLOT1	0	0	0.785769	7.23731	5.16047	3.15283	0.0014892	0.0347094	1
AT1G80650	RTL1	193.722	165.674	159.511	265.971	226.029	293.213	0.00149033	0.0347121	1
AT3G21351	NA	1.54978	1.89341	0	13.57	2.06419	12.6113	0.00149364	0.0347656	1
AT5G44580	NA	27.896	12.3072	11.0008	64.2312	48.5085	25.2226	0.00149717	0.0348242	1
AT5G19860	NA	247.964	228.156	196.442	312.109	300.34	410.919	0.0014984	0.0348291	1
AT2G33560	BUBR1	551.72	554.77	583.04	351.01	448.961	369.932	0.001501	0.0348659	1
AT3G47660	NA	0	0	3.14308	9.95131	5.16047	6.30566	0.00151185	0.0350943	1
AT3G61430	PIP1A	564.118	399.51	539.037	633.265	767.879	872.282	0.00151822	0.0352181	1
AT4G24060	NA	117.783	120.232	93.5065	148.365	178.552	215.443	0.00152336	0.0353134	1
AT5G43700	ATAUX2-11	199.921	218.689	183.87	341.963	283.826	271.143	0.00153546	0.03557	1
AT5G60490	FLA12	9.29865	13.2539	5.50038	20.8073	23.7382	27.3245	0.00153735	0.0355896	1
AT1G26180	NA	240.215	254.664	256.946	377.245	343.688	358.371	0.00154543	0.0357512	1
AT5G51910	NA	314.604	296.319	339.452	209.882	234.286	209.138	0.00154641	0.0357512	1
AT3G57830	NA	404.491	380.576	425.887	245.164	278.666	311.079	0.00155	0.0358099	1
AT3G12170	NA	229.367	281.172	217.658	154.698	150.686	49.3943	0.00155366	0.0358702	1
AT5G58470	TAF15b	1106.54	1138.89	1128.36	849.48	790.585	779.799	0.00155614	0.0359034	1
AT2G05310	NA	590.465	448.739	518.607	752.681	684.279	819.735	0.00156328	0.0360439	1
AT3G19390	NA	1.54978	6.62694	6.28615	18.998	6.19257	44.1396	0.00156572	0.0360758	1
AT1G53580	GLY3	176.674	135.379	179.941	232.499	227.061	320.537	0.00157405	0.0362433	1
AT1G71020	NA	869.424	866.236	740.98	1085.6	1101.25	1401.96	0.00157896	0.0362832	1
AT2G34420	LHB1B2	52756.2	36099.7	49467	63853.8	63237.1	80266.9	0.00157691	0.0362832	1
AT4G29140	ADS1	88.3372	111.711	68.3619	212.596	111.466	172.355	0.00157885	0.0362832	1
AT2G43560	NA	1108.09	939.132	863.56	1404.94	1389.2	1341	0.00158031	0.0362898	1
AT2G29440	GSTU6	7.74888	7.57365	11.0008	19.9026	21.674	24.1717	0.00158372	0.0363439	1
AT3G57040	ARR9	71.2897	57.7491	93.5065	96.7991	167.199	149.234	0.00158625	0.0363776	1
AT1G63180	UGE3	58.8915	64.376	62.8615	110.369	80.5034	155.54	0.00159004	0.0364401	1
AT5G66230	NA	1538.93	1773.18	1912.56	1292.77	1306.63	956.358	0.00159547	0.0365401	1
AT2G38300	NA	3.09955	0	0	7.23731	10.3209	4.20377	0.00160184	0.0366616	1
AT5G56740	HAG2	519.175	640.92	732.337	383.578	510.887	319.487	0.00160926	0.0367821	1
AT5G61410	RPE	4846.15	4408.81	4375.95	6195.14	6451.63	6273.08	0.00160846	0.0367821	1
AT2G27385	NA	2856.24	2477.53	2017.07	3450.39	3189.17	4330.93	0.00161547	0.0368994	1
AT1G61810	BGLU45	0	0.946706	1.57154	3.61866	4.12838	11.5604	0.00162421	0.0370623	1
AT4G02930	NA	2499.79	2594.92	2895.56	1991.17	2012.58	1556.45	0.00162476	0.0370623	1
AT1G23870	TPS9	765.589	678.788	730.765	917.33	949.527	1479.73	0.00162922	0.0370899	1
AT1G69320	CLE10	7.74888	13.2539	2.35731	25.3306	22.7061	18.917	0.00162897	0.0370899	1
AT5G54500	FQR1	429.288	390.99	415.672	553.655	572.813	625.311	0.00162869	0.0370899	1
AT1G26760	SDG35	327.003	341.761	390.527	266.876	248.735	196.526	0.00163366	0.0371416	1
AT1G58350	ZW18	119.333	122.125	111.579	160.126	196.098	189.17	0.00163318	0.0371416	1
AT4G39080	VHA-A3	998.056	1219.36	1034.07	1359.71	1603.88	1715.14	0.00163932	0.0372456	1
AT5G67210	IRX15-L	0	3.78682	7.07192	10.856	17.5456	12.6113	0.00164183	0.0372779	1
AT2G13610	ABCG5	365.747	381.523	348.881	511.135	568.684	483.434	0.0016571	0.0375997	1
AT2G47180	GolS1	10.8484	5.68024	8.64346	25.3306	14.4493	27.3245	0.00165941	0.0376273	1
AT1G77490	TAPX	901.97	806.594	724.479	1005.99	1175.56	1359.92	0.0016737	0.0379262	1
AT5G52570	BETA-OHASE 2	20.1471	12.3072	25.9304	30.7586	103.209	40.9868	0.00167805	0.0379996	1
AT3G47800	NA	1430.44	1148.35	836.844	1975.79	1342.76	2297.36	0.00169089	0.0382651	1
AT3G05160	NA	106.935	124.71	105.002	155.268	170.182	210.767	0.00169665	0.0383701	1
AT5G11260	HY5	105.385	88.9904	97.4353	56.9939	66.0541	48.3434	0.00170723	0.0385838	1
AT1G78850	NA	1101.89	957.12	639.616	1741.48	1027.97	1741.41	0.00170873	0.0385922	1
AT1G33590	NA	2214.63	2164.17	1292.59	2951.01	2406.85	4087.12	0.00171053	0.0386075	1
AT1G51400	NA	2588.13	1747.62	1969.14	3058.67	2944.57	3234.8	0.00171224	0.0386207	1
AT3G14760	NA	123.982	77.6299	99.0069	181.838	177.52	139.775	0.00171409	0.0386369	1
AT4G23890	NdhS	542.422	479.033	528.822	690.259	673.958	879.639	0.00172469	0.0388251	1
AT5G59870	HTA6	4303.73	4424.9	4561.39	3618.66	2974.5	2749.27	0.0017247	0.0388251	1
AT4G33810	NA	10.8484	12.3072	9.42923	25.3306	30.9628	19.9679	0.00173153	0.0389531	1
AT5G50740	NA	1159.23	1136.05	1102.43	936.328	716.274	460.313	0.00173555	0.0390181	1
AT1G57990	PUP18	813.632	792.393	495.034	1381.42	820.515	1255.88	0.00173876	0.0390448	1
AT5G08050	NA	765.589	663.641	767.696	1023.18	1076.47	983.682	0.00173902	0.0390448	1
AT5G58900	NA	212.319	265.078	178.37	379.054	264.216	400.409	0.0017516	0.0393015	1
AT3G62720	XT1	920.567	1058.42	1119.72	849.48	630.61	642.126	0.00175937	0.03945	1
AT5G66040	STR16	144.129	121.178	110.793	216.215	165.135	209.138	0.00176194	0.0394817	1
AT2G26980	CIPK3	457.184	371.109	476.962	665.833	649.188	571.713	0.00176434	0.0394865	1
AT4G26540	NA	477.331	570.864	479.319	629.646	753.429	842.856	0.00176446	0.0394865	1
AT5G06340	NUDX27	557.919	530.155	484.034	891.094	639.899	756.679	0.00176656	0.0395078	1
AT1G31200	PP2-A9	13.948	1.89341	9.42923	0	1.03209	2.10189	0.0017698	0.0395545	1
AT4G24710	NA	151.878	170.407	190.942	125.748	104.242	60.9547	0.00177432	0.0396296	1
AT2G37960	NA	48.043	120.232	96.6496	29.8539	57.7973	27.3245	0.00177934	0.0397158	1
AT3G47530	NA	74.3892	88.0437	85.6488	40.7099	47.4764	55.7	0.00178084	0.0397235	1
AT3G21560	UGT84A2	432.387	499.861	685.19	329.298	415.934	284.805	0.00178363	0.0397597	1
AT5G53490	NA	1146.83	1141.73	971.21	1468.27	1390.23	1874.88	0.00178529	0.0397709	1
AT3G62660	GATL7	156.527	110.765	131.223	248.783	155.846	264.838	0.00179912	0.0400464	1
AT5G54170	NA	336.301	284.959	290.734	463.188	413.87	425.632	0.0018	0.0400464	1
AT1G12980	ESR1	12.3982	8.52035	7.07192	5.42799	0	0	0.00180909	0.0402226	1
AT1G78270	UGT85A4	196.822	159.993	135.152	315.728	162.039	492.892	0.00181394	0.0403043	1
AT2G20940	NA	187.523	191.235	151.653	117.606	101.145	119.807	0.00181892	0.0403584	1
AT3G03060	NA	399.842	485.66	520.179	355.533	334.399	235.411	0.00182017	0.0403584	1
AT3G55800	SBPASE	3824.85	4009.3	3836.12	4568.55	6203.92	5950.44	0.00181986	0.0403584	1
AT4G18640	MRH1	13.948	31.2413	9.42923	41.6146	38.1875	60.9547	0.00182109	0.0403584	1
AT3G06380	TLP9	246.414	202.595	226.301	351.914	279.698	372.034	0.0018267	0.0404566	1
AT4G15760	MO1	127.082	88.9904	87.2203	139.318	165.135	199.679	0.00183017	0.0405073	1
AT3G24090	GFAT	134.83	214.902	157.94	88.6571	124.883	55.7	0.00183684	0.0406287	1
AT3G61260	NA	1050.75	836.888	703.263	1450.18	925.789	2128.16	0.0018423	0.0406479	1
AT5G37790	NA	167.376	175.141	168.94	123.034	113.53	91.432	0.00184205	0.0406479	1
AT5G38520	NA	777.987	579.384	738.623	995.131	957.784	1055.15	0.00184327	0.0406479	1
AT5G57565	NA	34.0021	49.9861	36.939	81.5645	59.8615	83.2977	0.0018429	0.0406479	1
AT5G57710	NA	748.542	686.362	721.336	996.035	1042.42	960.562	0.00184364	0.0406479	1
AT3G26085	NA	123.982	131.592	139.081	210.787	178.552	209.138	0.00184628	0.04068	1
AT4G38740	ROC1	2454.84	2211.51	2480.67	1999.31	1501.7	1397.75	0.00185392	0.040822	1
AT2G41650	NA	1097.24	978.894	1323.23	915.52	737.948	564.356	0.00185537	0.0408277	1
AT5G14920	NA	796.585	799.967	549.252	1634.73	705.953	1458.71	0.00185753	0.0408491	1
AT4G20920	NA	21.6969	27.4545	34.5738	12.6653	12.3851	12.6113	0.00186066	0.0408915	1
AT5G02350	NA	7.74888	12.3072	13.3581	3.61866	3.09628	2.10189	0.00186286	0.0409014	1
AT5G08640	FLS1	340.951	393.83	612.114	201.74	361.233	139.775	0.0018635	0.0409014	1
AT4G00820	iqd17	206.12	205.435	227.087	162.84	137.269	111.4	0.00187752	0.0411746	1
AT5G38700	NA	15.4978	19.8808	12.5723	9.04664	2.06419	4.20377	0.00187835	0.0411746	1
AT4G01460	NA	178.224	194.075	136.724	255.115	245.639	271.143	0.00187971	0.0411782	1
AT1G76130	AMY2	37.1946	30.2946	32.2165	13.57	21.674	7.3566	0.00189325	0.0414483	1
AT3G07410	RABA5b	396.743	329.454	475.39	285.874	264.216	260.634	0.00189656	0.0414943	1
AT1G48920	NUC-L1	9498.58	12430.3	11721.3	8425.14	8134.97	6832.18	0.00189803	0.0414998	1
AT5G54940	NA	878.723	751.685	651.402	1252.96	873.152	1333.65	0.00190163	0.0415522	1
AT3G27200	NA	21.6969	3.78682	0	38.9006	30.9628	43.0886	0.00190991	0.0417064	1
AT5G45680	FKBP13	626.109	544.356	516.25	887.476	788.52	727.252	0.00192101	0.0418987	1
AT5G46260	NA	0	0	0	4.52332	3.17885	3.15283	0.00192116	0.0418987	1
AT3G27210	NA	113.134	130.645	99.0069	73.2778	55.7331	74.6169	0.00192982	0.0420608	1
AT2G43920	HOL2	18.5973	21.7742	18.8585	34.3772	60.8936	33.6302	0.00193549	0.0421575	1
AT5G40770	PHB3	2079.8	1994.71	2333.73	1674.53	1499.63	1367.28	0.00193753	0.0421751	1
AT5G55120	VTC5	751.641	705.296	788.912	433.334	646.091	400.409	0.00194331	0.0422741	1
AT5G43440	NA	54.2422	68.1628	25.1446	102.227	84.6318	122.96	0.00194745	0.0423373	1
AT5G19120	NA	1146.83	1272.37	1484.32	1807.52	1553.3	3018.31	0.00195478	0.0424696	1
AT5G15980	NA	486.63	616.306	614.471	358.247	466.507	326.843	0.00196192	0.0425978	1
AT3G21755	NA	32.5453	41.6551	17.2869	68.7545	60.8936	57.8018	0.00196509	0.0426397	1
AT4G17940	NA	215.419	185.554	150.082	286.779	243.574	306.875	0.00196647	0.0426424	1
AT5G40890	CLC-A	531.573	573.704	618.4	843.147	878.313	723.048	0.00197021	0.0426965	1
AT1G05087	NA	26.6251	30.3514	28.7041	56.3606	53.4212	48.5325	0.0019873	0.0430256	1
AT3G01710	NA	582.716	666.481	598.756	475.853	444.833	361.524	0.0019879	0.0430256	1
AT3G14740	NA	182.874	295.372	235.731	128.462	173.392	57.8018	0.00199061	0.043057	1
AT3G28040	NA	1300.26	1428.58	1364.09	1701.67	2295.38	1853.86	0.00199596	0.043091	1
AT4G22380	NA	243.315	322.827	362.239	213.501	218.804	177.609	0.0019957	0.043091	1
AT5G14510	NA	10.8484	3.78682	7.07192	18.998	12.3851	35.732	0.00199376	0.043091	1
AT4G26415	NA	24.7964	14.2006	14.1438	30.7586	48.5085	35.732	0.00199795	0.0431069	1
AT2G18570	NA	0	0	2.35731	3.61866	4.12838	11.5604	0.00201364	0.043418	1
AT1G28310	NA	57.3417	71.9497	60.5042	88.6571	115.595	117.706	0.00201633	0.0434275	1
AT2G25200	NA	15.4978	17.9874	17.2869	25.3306	34.0591	67.2603	0.00201672	0.0434275	1
AT5G06610	NA	9.29865	3.78682	4.71461	19.9026	12.3851	17.866	0.00201788	0.0434275	1
AT3G53190	NA	2048.8	2228.55	2034.36	1627.49	1567.75	1253.77	0.0020202	0.0434503	1
AT3G25970	NA	63.5408	71.9497	55.7896	41.6146	34.0591	29.4264	0.0020414	0.0438786	1
AT3G05480	RAD9	82.1381	138.219	107.65	67.8498	66.0541	51.4962	0.0020443	0.0438877	1
AT3G11780	NA	164.276	152.42	168.94	228.88	246.671	235.411	0.00204439	0.0438877	1
AT3G18280	NA	32.5453	45.4419	25.9304	60.6125	60.8936	74.6169	0.00205043	0.0439899	1
AT1G17820	NA	108.484	0	0	0	0	0	0.00205379	0.0439972	1
AT1G29910	CAB3	55555.4	37021.9	52765.7	71487	70186.5	70951.3	0.00205462	0.0439972	1
AT3G61198	NA	32.5453	12.6385	9.35851	50.9597	27.8666	84.0754	0.00205342	0.0439972	1
AT3G51380	IQD20	0	0	0	5.42799	0	7.3566	0.00205802	0.0440423	1
AT1G11960	NA	167.376	211.115	211.372	109.464	146.557	122.96	0.00206478	0.0441044	1
AT1G26920	NA	187.523	192.181	132.795	236.117	268.345	280.602	0.00206423	0.0441044	1
AT4G16807	NA	92.9865	103.191	86.4346	47.0425	70.1825	39.9358	0.002063	0.0441044	1
AT1G03600	PSB27	2877.93	2078.97	2398.95	3547.19	3198.46	3850.65	0.00206683	0.0441207	1
AT1G47530	NA	1805.49	1789.27	2193.87	1342.52	1507.89	1212.79	0.00207307	0.0441764	1
AT1G77030	NA	858.576	1006.35	909.135	664.024	693.568	627.413	0.00207078	0.0441764	1
AT2G37080	RIP2	3584.63	3309.68	3710.4	2810.79	2543.08	2129.21	0.00207402	0.0441764	1
AT3G02170	LNG2	367.297	357.855	319.022	542.799	480.956	461.364	0.00207459	0.0441764	1
AT1G72440	EDA25	1013.55	1214.62	1251.73	813.293	873.152	786.105	0.00207809	0.0442234	1
AT1G43800	FTM1	30.9955	14.2006	29.8592	9.04664	12.3851	1.05094	0.00208591	0.0443303	1
AT2G16460	NA	216.969	201.648	207.443	140.223	156.878	98.7886	0.00208654	0.0443303	1
AT3G52105	NA	48.043	51.1221	53.4323	94.0851	66.0541	119.807	0.002087	0.0443303	1
AT3G51760	NA	0	1.89341	0	9.95131	5.16047	3.15283	0.00209027	0.0443723	1
AT5G24330	ATXR6	65.0906	102.244	99.0069	53.3752	54.701	27.3245	0.00209609	0.0444682	1
AT5G06290	2-Cys Prx B	2209.98	2176.48	1886.63	2660.62	2991.01	3129.71	0.0021045	0.044619	1
AT2G14660	NA	120.883	113.605	120.223	86.8478	66.0541	63.0566	0.00211587	0.0448323	1
AT1G54280	NA	0	0	0	1.80933	4.12838	5.25471	0.00212893	0.0450534	1
AT3G45870	UMAMIT3	0	0	0	1.80933	4.12838	5.25471	0.00212858	0.0450534	1
AT2G12190	NA	3.14604	3.78682	1.57154	4.52332	13.5101	17.866	0.002138	0.0452173	1
AT1G68390	NA	0	2.84012	1.57154	5.42799	9.28885	7.3566	0.00214462	0.0453014	1
AT5G35630	GS2	8918.96	8195.63	8584.52	10182	12975.5	13153.6	0.00214383	0.0453014	1
AT2G30990	NA	237.116	246.144	142.224	341.058	276.601	398.307	0.00215556	0.0454764	1
AT3G14930	HEME1	3390.91	3197.03	2725.05	4161.46	4264.62	4618.89	0.00215438	0.0454764	1
AT3G44990	XTH31	18.5973	15.1473	22.0015	30.7586	52.6368	35.732	0.0021671	0.0456556	1
AT3G50630	KRP2	69.7399	62.4826	83.2915	143.842	102.177	116.655	0.00216794	0.0456556	1
AT5G16690	ORC3	176.674	227.209	216.086	124.844	162.039	91.432	0.00216805	0.0456556	1
AT3G12060	TBL1	61.991	57.7491	73.8623	41.6146	30.9628	35.732	0.00217115	0.0456929	1
AT5G02950	NA	123.982	179.874	176.798	71.4685	120.755	89.3301	0.00218197	0.0458923	1
AT1G04570	NA	13.948	32.188	33.0023	15.3793	8.25676	7.3566	0.00218573	0.0459046	1
AT1G15180	NA	551.302	535.514	452.477	669.189	683.969	878.294	0.00218475	0.0459046	1
AT1G15810	NA	703.598	655.121	689.905	437.858	526.368	493.943	0.0021877	0.0459046	1
AT1G51110	NA	412.24	424.124	390.527	563.606	601.711	551.745	0.00218791	0.0459046	1
AT2G36895	NA	51.1426	55.8557	42.4315	84.1338	87.7281	80.9226	0.00219654	0.0460292	1
AT3G51840	ACX4	1050.75	865.289	838.415	1218.58	1119.82	2190.16	0.00219609	0.0460292	1
AT1G01110	IQD18	37.1946	52.0688	53.4323	80.5151	71.2145	105.094	0.00222112	0.0464875	1
AT4G18710	BIN2	994.956	870.023	906.777	1231.25	1219.94	1419.82	0.00222058	0.0464875	1
AT1G78070	NA	133.281	181.768	205.871	112.178	117.659	57.8018	0.0022297	0.0466387	1
AT4G37930	SHM1	5294.03	5423.68	4968.42	6429.45	8229.92	7333.48	0.00223203	0.0466589	1
AT2G21140	PRP2	1726.45	1740.05	1697.26	1611.21	3574.14	3545.88	0.00223401	0.0466717	1
AT1G59590	ZCF37	27.896	16.094	10.215	38.9006	35.0912	42.0377	0.00223644	0.0466941	1
AT2G28800	ALB3	3383.16	3208.39	2861.77	4191.31	4361.63	4541.12	0.00224225	0.0467659	1
AT4G35270	NA	44.9435	60.5892	80.1484	108.56	139.333	90.3811	0.00224398	0.0467659	1
AT5G60910	AGL8	0	1.89341	5.50038	13.57	9.28885	7.3566	0.00224266	0.0467659	1
AT3G42670	CHR38	261.912	380.576	207.443	172.791	118.691	202.832	0.00224839	0.0468293	1
AT1G72630	ELF4-L2	116.233	89.9371	93.5065	172.791	134.172	168.151	0.00225822	0.0470054	1
AT1G51500	ABCG12	824.481	796.18	870.632	958.04	1381.98	1265.33	0.00226048	0.047024	1
AT4G37560	NA	43.3937	18.9341	30.645	55.1845	66.0541	58.8528	0.00226359	0.0470315	1
AT5G43660	NA	7.74888	11.3605	9.42923	2.71399	2.06419	2.10189	0.00226321	0.0470315	1
AT1G28480	GRX480	10.8484	13.2539	13.3581	8.14198	0	1.05094	0.00226828	0.0471005	1
AT3G45930	NA	1058.2	1182.6	1247.63	954.068	754.544	736.543	0.00227621	0.0472365	1
AT1G08830	CSD1	1684.61	1034.75	903.634	2146.77	1819.58	1773.99	0.00228468	0.0473836	1
AT5G12050	NA	148.778	127.805	178.37	234.308	279.698	198.628	0.00228999	0.047465	1
AT2G02350	SKIP3	24.7964	23.6677	33.0023	11.7606	14.4493	10.5094	0.00229346	0.0475083	1
AT1G29930	CAB1	162418	136439	146227	205721	187915	230339	0.00230098	0.0476065	1
AT2G26530	AR781	379.695	360.695	233.373	587.127	422.127	505.503	0.00230041	0.0476065	1
AT5G63800	MUM2	21.6969	18.9341	5.50038	28.0446	79.4713	35.732	0.00230791	0.0477209	1
AT3G46940	DUT1	616.811	944.813	876.918	452.332	599.647	173.406	0.002322	0.0479544	1
AT4G37090	NA	337.851	356.908	362.239	285.874	223.965	218.596	0.00232154	0.0479544	1
AT4G05150	NA	561.019	550.036	444.745	790.677	588.294	1016.26	0.00232923	0.0480748	1
AT2G26330	ER	3376.96	3775.46	3297.87	2295.13	2428.52	2769.23	0.00235781	0.0486061	1
AT4G38710	NA	1475.39	1629.28	2285.8	1092.83	1448.03	883.843	0.00235757	0.0486061	1
AT1G30380	PSAK	9489.28	6369.44	6932.84	12334.2	10215.7	10926.7	0.00236037	0.0486295	1
AT3G19440	NA	141.03	141.059	125.723	92.2758	89.7923	77.7698	0.00236688	0.0487343	1
AT1G17950	MYB52	0	0	0	4.52332	5.16047	1.05094	0.0023715	0.0487709	1
AT1G59660	NA	131.731	195.968	188.585	113.083	107.338	105.094	0.0023703	0.0487709	1
AT4G12690	NA	27.896	15.1473	19.6442	30.7586	44.3801	64.1075	0.00237365	0.0487858	1
AT2G33480	NAC041	6.1991	10.4138	7.85769	18.998	12.3851	53.5981	0.00237626	0.0488102	1
AT2G38940	PHT1;4	27.896	30.2946	32.2165	72.3731	43.348	55.7	0.00238147	0.0488879	1
AT1G61870	PPR336	695.849	911.678	1022.29	593.46	653.316	560.152	0.00238601	0.0489519	1
AT4G23190	CRK11	86.7874	103.191	98.2211	128.462	144.493	203.883	0.00238894	0.0489825	1
AT5G13290	CRN	331.652	337.974	398.385	253.306	251.831	244.87	0.00239562	0.0490901	1
AT3G26740	CCL	5974.39	6179.15	2230.8	9598.49	5856.11	14853	0.00239896	0.0491	1
AT4G19860	NA	354.899	361.642	359.096	458.665	471.667	637.922	0.0023984	0.0491	1
AT5G04820	OFP13	83.6879	71.9497	66.0046	135.7	127.98	99.8395	0.00240384	0.0491703	1
AT1G15820	LHCB6	18183.5	14209.1	17408.7	22632	22907.3	24185.3	0.00241164	0.0493006	1
AT4G38680	GRP2	6484.26	5433.15	7159.93	4962.99	4179.98	4295.2	0.00241435	0.0493264	1
AT2G42320	NA	221.618	251.824	250.66	324.774	372.586	337.353	0.0024232	0.0494777	1
AT4G36500	NA	382.795	300.106	249.874	559.083	360.201	541.235	0.00243005	0.0495881	1
AT3G01850	NA	131.731	119.285	134.366	250.592	151.718	215.443	0.0024372	0.0497043	1
AT1G28010	ABCB14	196.822	170.407	226.301	281.351	405.613	249.073	0.00243988	0.0497295	1
AT5G23780	DUF9	75.939	93.7239	89.5776	48.8519	51.6047	55.7	0.00244139	0.0497306	1
AT3G05060	NA	1869.03	2138.61	2440.6	1528.88	1693.67	1219.09	0.00245555	0.0499893	1
AT2G19520	FVE	2059.65	2164.17	2245.73	1614.83	1676.12	1333.65	0.00245778	0.0500051	0
AT5G53160	RCAR3	635.408	471.46	483.248	742.729	653.316	1026.77	0.002465	0.0501222	0
AT5G56370	NA	41.8439	30.2946	44.7888	21.7119	21.674	11.5604	0.00247524	0.0503006	0
AT3G61580	SLD1	2549.38	2557.05	2126.29	3306.55	2899.15	4528.51	0.00248141	0.0503961	0
AT3G01220	HB20	4.64933	0	0.785769	9.95131	12.3851	4.20377	0.00248696	0.0504788	0
AT2G45040	NA	0	0	0	6.33265	2.06419	2.10189	0.00249356	0.0505528	0
AT4G09010	TL29	3641.97	3347.55	3098.29	4723.25	4715.64	4454.95	0.00249263	0.0505528	0
AT5G58787	NA	83.6879	89.9371	84.0773	141.128	110.434	171.304	0.00251468	0.0509508	0
AT1G06110	SKIP16	322.353	223.423	251.446	410.718	361.233	396.205	0.00252147	0.0510015	0
AT3G48420	NA	547.071	548.143	539.037	694.782	779.232	791.36	0.00252164	0.0510015	0
AT4G00238	NA	396.743	441.165	491.891	335.63	263.184	324.741	0.00252045	0.0510015	0
AT2G39000	NA	172.025	144.846	168.155	237.927	203.323	304.773	0.00252319	0.0510027	0
AT5G63950	CHR24	807.433	939.132	821.128	584.413	702.857	488.688	0.00252474	0.0510038	0
ATCG00040	MATK	381.245	273.598	387.384	358.247	841.157	603.241	0.00252634	0.0510061	0
AT4G02670	IDD12	20.1471	18.9341	16.5011	9.04664	8.25676	4.20377	0.00254498	0.0513523	0
AT5G16486	NA	0	0	0	9.95131	2.06419	1.05094	0.00255308	0.051455	0
AT5G44570	NA	3.09955	3.78682	1.57154	12.6653	9.28885	8.40754	0.00255288	0.051455	0
AT3G56370	NA	2346.36	2642.26	2820.91	1764.1	2151.92	1498.64	0.0025551	0.0514656	0
AT5G10400	NA	2888.78	3021.89	3040.14	2516.78	1838.16	1954.75	0.00255998	0.0515334	0
AT3G14420	GOX1	3930.23	3472.52	3701.76	4721.44	5665.17	5009.84	0.00257201	0.0517452	0
AT5G20070	NUDX19	784.187	762.098	986.926	556.369	693.568	432.988	0.0025769	0.0518133	0
AT1G11990	NA	1.54978	0.946706	0.785769	10.856	6.19257	3.15283	0.00258513	0.0519482	0
AT4G28770	NA	207.67	170.407	159.511	251.497	252.863	285.856	0.00258906	0.0519967	0
AT5G13410	NA	172.025	137.272	168.155	237.022	210.547	269.041	0.00259934	0.0521726	0
AT4G37140	MEE69	9.29865	3.78682	4.71461	1.80933	0	0	0.00262913	0.0527396	0
AT1G64150	NA	288.258	266.971	237.302	355.533	363.297	409.868	0.00263205	0.0527674	0
AT5G35100	NA	461.833	455.366	340.238	572.653	533.593	801.869	0.00263551	0.0528057	0
AT5G51720	NEET	413.79	255.611	372.454	630.551	487.149	476.077	0.00264138	0.0528925	0
AT5G59970	NA	1571.47	1586.21	1670.54	1344.33	1012.49	1062.5	0.00264543	0.0529426	0
AT2G32690	GRP23	1523.43	1381.24	1601.4	2036.4	2507.99	1857.02	0.00266317	0.0531733	0
AT4G24790	NA	292.908	358.802	315.093	214.405	216.74	241.717	0.00266282	0.0531733	0
AT5G48790	NA	199.921	197.862	166.583	293.111	244.606	285.856	0.00265856	0.0531733	0
AT5G65740	NA	89.887	94.6706	80.1484	130.272	120.755	190.221	0.00266302	0.0531733	0
AT4G34881	NA	847.727	742.218	686.762	1179.68	852.51	1345.21	0.00266882	0.0532551	0
AT1G76160	sks5	855.476	992.148	905.206	1133.54	1265.35	1491.29	0.00268548	0.0535291	0
AT1G77110	PIN6	127.082	156.206	138.295	104.036	76.375	84.0754	0.00268567	0.0535291	0
AT4G22790	NA	0	0.946706	0	2.71399	7.22466	4.20377	0.00268904	0.0535651	0
AT2G33210	HSP60-2	1838.03	1935.07	2287.37	1366.95	1652.38	1199.13	0.00269333	0.0536193	0
AT1G76760	TY1	48.043	48.282	76.2196	25.3306	35.0912	29.4264	0.00270981	0.053916	0
AT2G33580	LYK5	457.184	577.491	468.318	410.718	300.34	312.13	0.00272195	0.0541262	0
AT3G03960	NA	2462.59	2961.3	3361.52	1961.31	2360.4	1734.06	0.00273169	0.0542884	0
AT5G27670	HTA7	1256.87	1373.67	1360.95	1072.93	829.804	950.052	0.00273502	0.0543231	0
AT3G59190	NA	13.948	17.0407	18.0727	4.52332	6.19257	7.3566	0.00273836	0.054358	0
AT5G49690	NA	0	0	0	6.33265	1.03209	3.15283	0.00274211	0.0543792	0
AT5G56010	HSP81-3	5645.41	6580.73	7435.86	4116.92	5386.86	2459.2	0.00274261	0.0543792	0
AT2G43400	ETFQO	213.869	243.303	193.299	275.923	258.024	813.43	0.00274622	0.0544193	0
AT1G24577	NA	7.74888	0.946706	0	12.6653	10.3209	9.45848	0.00275924	0.0546033	0
AT1G79160	NA	142.579	102.244	83.2915	157.412	172.36	207.036	0.00276029	0.0546033	0
AT5G49130	NA	0	1.89341	0	2.71399	7.22466	7.3566	0.00275729	0.0546033	0
AT1G28360	ERF12	61.991	54.9089	27.5019	22.6166	15.4814	25.2226	0.00276478	0.0546291	0
AT2G35605	NA	336.301	347.441	354.382	265.067	256.992	180.762	0.00276397	0.0546291	0
AT5G22750	RAD5	213.869	306.733	251.446	142.937	200.226	158.692	0.00276882	0.0546774	0
AT3G46870	NA	164.276	190.288	181.513	134.795	110.434	108.247	0.00277534	0.0547747	0
AT5G07030	NA	1170.08	1470.23	1160.58	868.478	1026.93	715.692	0.00277948	0.054816	0
AT5G18400	NA	471.132	470.513	583.04	370.008	378.779	319.487	0.00278064	0.054816	0
AT1G49475	NA	17.0475	18.9341	14.9296	2.71399	10.3209	5.25471	0.00280539	0.0552722	0
AT1G68840	RAV2	1383.95	1371.78	1712.19	2562.01	1700.89	2309.97	0.00280855	0.0553025	0
AT4G27430	CIP7	897.32	890.85	877.704	1114.55	1363.4	1210.69	0.00281654	0.055428	0
AT2G17690	SDC	1.54978	0.946706	3.92884	9.04664	12.3851	7.3566	0.00282332	0.0555297	0
AT5G66190	FNR1	3913.18	3417.61	3356.8	4671.69	5056.23	4957.3	0.00283425	0.0557126	0
AT1G18370	HIK	2392.85	2365.82	2470.46	1760.48	1951.69	1407.21	0.00284568	0.055887	0
AT1G65845	NA	6.1991	3.78682	2.35731	23.5213	7.22466	12.6113	0.00284639	0.055887	0
AT1G21326	NA	0	0.946706	0	7.23731	2.06419	5.25471	0.00285234	0.0559399	0
AT3G62750	BGLU8	251.064	301.053	235.731	348.296	352.976	456.109	0.0028518	0.0559399	0
AT2G42750	NA	184.423	161.887	216.872	233.403	281.762	347.862	0.00286267	0.0561103	0
AT3G52240	NA	201.471	200.702	188.585	246.069	267.313	395.154	0.00286828	0.0561882	0
AT1G68530	KCS6	1153.03	1066.94	1288.66	1300	1720.5	2367.77	0.00287417	0.0562712	0
AT4G34160	CYCD3;1	1168.53	1137.94	1133.86	829.577	908.243	755.628	0.00287768	0.0563079	0
ENSRNA049495034	NA	8.69424	6.91095	5.79112	8.58526	36.9696	26.3471	0.00288832	0.0564516	0
ENSRNA049495094	NA	8.69424	6.91095	5.79112	8.58526	36.9696	26.3471	0.00288683	0.0564516	0
AT5G26280	NA	548.621	542.463	685.19	749.062	893.794	878.588	0.00289306	0.056512	0
AT2G35820	NA	52.6924	46.3886	35.3596	63.3265	81.5355	94.5848	0.00289965	0.0566084	0
AT3G09390	MT2A	393.643	377.736	204.3	808.77	307.564	774.545	0.00290217	0.0566254	0
AT3G56940	CRD1	12213.8	9976.39	12153.5	13750	17381.5	17499.2	0.0029095	0.0567361	0
AT4G23800	3xHMG-box2	6724.48	7088.93	6662.53	5356.52	4976.76	4645.17	0.00293077	0.0571184	0
AT5G25230	NA	4.68032	5.76544	4.7539	22.7704	17.783	7.40915	0.00293675	0.0572023	0
AT5G63770	DGK2	130.181	232.89	231.802	134.795	119.723	102.992	0.00295188	0.0574643	0
AT5G42750	BKI1	48.043	66.2694	55.0038	84.1338	107.338	93.5339	0.00295361	0.0574654	0
AT4G26780	AR192	351.799	462.939	459.675	301.253	326.142	244.87	0.00295893	0.0575363	0
AT4G35380	NA	0	0	3.14308	6.33265	5.16047	7.3566	0.00297807	0.0578755	0
AT1G14190	NA	0	1.89341	0.785769	9.04664	6.19257	4.20377	0.00298036	0.0578872	0
AT1G50280	NA	17.0475	55.8557	21.2158	49.7565	101.145	84.0754	0.00299368	0.0580679	0
AT2G41940	ZFP8	283.609	260.344	194.871	404.385	312.725	381.492	0.00299363	0.0580679	0
ATCG00380	RPS4	68.1901	40.7084	58.9327	124.844	93.9206	80.9226	0.00299474	0.0580679	0
AT4G31780	MGD1	754.741	781.032	640.402	997.845	995.972	1016.26	0.00299942	0.0581257	0
AT1G09910	NA	80.5883	77.6299	69.1477	113.988	110.434	137.673	0.00300501	0.0582011	0
AT4G16680	NA	4.64933	9.46706	11.0008	18.0933	17.5456	27.3245	0.00301427	0.0583473	0
AT5G24420	PGL5	198.371	147.686	175.226	80.5151	143.461	77.7698	0.00304388	0.0588872	0
AT4G25350	SHB1	6.1991	4.73353	2.35731	9.04664	10.3209	31.5283	0.00304672	0.058909	0
AT1G63520	NA	0	0	2.35731	1.80933	8.25676	8.40754	0.00304934	0.0589263	0
AT4G24170	NA	0	0	0	7.23731	5.16047	0	0.0030757	0.0594023	0
AT1G64720	CP5	6913.55	4323.61	5991.49	8011.71	7622.02	10138.4	0.00307976	0.0594472	0
AT2G45190	AFO	982.558	1062.2	980.64	727.35	757.558	730.405	0.00308462	0.0595075	0
AT1G64770	PnsB2	567.218	560.45	608.971	764.441	944.367	732.507	0.00309252	0.0595592	0
AT3G45730	NA	9.29865	9.46706	19.6442	38.9006	11.353	109.298	0.00308947	0.0595592	0
AT5G49720	GH9A1	1616.42	1725.85	1563.68	2025.54	2172.56	2690.41	0.00309151	0.0595592	0
AT1G30280	NA	13.948	17.0407	1.57154	37.0912	19.6098	73.566	0.0030963	0.059565	0
AT1G54710	ATG18H	206.12	285.905	247.517	315.728	369.49	402.511	0.00309515	0.059565	0
AT3G59550	SYN3	196.822	258.451	276.591	138.414	187.841	63.0566	0.00309839	0.0595718	0
AT1G73690	CDKD1;1	75.939	131.592	125.723	64.2312	63.9899	67.2603	0.00311581	0.0598061	0
AT1G80240	DGR1	0	0	0.785769	1.80933	5.16047	7.3566	0.00311282	0.0598061	0
AT3G53650	NA	306.856	308.626	301.735	231.594	221.9	191.272	0.00311451	0.0598061	0
AT2G25590	NA	1.54978	7.57365	4.71461	12.6653	9.28885	28.3754	0.00312685	0.0599843	0
AT5G22430	NA	0	0	0.785769	0.904664	10.3209	5.25471	0.00313861	0.0601764	0
AT5G13960	SUVH4	384.344	417.497	432.959	329.298	284.858	256.43	0.00315597	0.0604753	0
AT1G75690	LQY1	977.909	615.359	800.698	1183.3	1109.5	1185.46	0.00316864	0.0606666	0
AT3G20370	NA	306.856	318.093	407.814	479.472	738.98	411.969	0.00317126	0.0606666	0
AT5G17040	NA	6.1991	4.73353	5.50038	0	1.03209	1.05094	0.0031705	0.0606666	0
AT1G77270	NA	430.838	418.444	440.031	332.012	275.569	314.232	0.00317775	0.0607094	0
AT3G48150	APC8	333.202	347.441	358.311	252.401	262.152	224.902	0.00317681	0.0607094	0
AT5G10410	NA	1.54978	4.73353	1.57154	6.33265	24.7703	7.3566	0.00317882	0.0607094	0
AT1G76030	VAB1	864.775	827.421	947.637	1055.74	1295.28	1339.95	0.00318308	0.0607231	0
AT3G02550	LBD41	339.401	469.566	386.598	343.772	176.488	107.196	0.00318286	0.0607231	0
AT4G15770	NA	715.996	716.656	847.059	580.794	574.877	457.16	0.00319044	0.0608297	0
AT5G54660	NA	1.54978	0.946706	0	4.52332	6.19257	5.25471	0.00320173	0.0610109	0
AT1G05440	NA	299.107	263.184	309.593	205.359	224.997	125.062	0.00321395	0.0612098	0
AT2G40330	PYL6	23.2466	19.8808	25.9304	44.3286	31.9949	70.4132	0.00321597	0.0612142	0
AT4G12540	NA	114.683	180.821	169.726	77.8011	121.787	60.9547	0.00322474	0.0613131	0
AT4G23620	NA	359.548	366.375	357.525	289.493	258.024	173.406	0.00322327	0.0613131	0
AT5G60970	TCP5	201.471	211.115	157.154	246.973	284.858	308.977	0.00322848	0.0613502	0
AT2G47930	AGP26	133.281	126.859	91.1492	223.452	173.392	161.845	0.00323138	0.0613711	0
AT1G06680	PSBP-1	19150.6	16782.3	16799	22703.5	24468.9	24881.1	0.00324118	0.0615231	0
AT5G23120	HCF136	1607.12	1613.19	1378.24	2040.02	2098.25	2165.99	0.00324359	0.0615347	0
AT5G54670	ATK3	554.82	605.892	627.044	417.955	490.245	323.69	0.00324822	0.0615885	0
AT3G03270	NA	13.948	9.46706	18.8585	66.9452	20.6419	30.4773	0.00325078	0.0615949	0
AT4G10120	ATSPS4F	1.54978	0	0	1.80933	10.3209	6.30566	0.00325215	0.0615949	0
AT3G18600	NA	906.619	1074.51	1119.72	801.533	746.205	677.858	0.00325976	0.0617048	0
AT5G51830	NA	235.566	237.623	248.303	167.363	178.552	156.59	0.00326989	0.0618626	0
AT3G56870	NA	154.978	270.758	184.656	114.892	150.686	62.0056	0.0032765	0.0619533	0
AT4G14090	NA	18.5973	54.9089	95.078	24.4259	23.7382	11.5604	0.00327881	0.0619628	0
AT3G18050	NA	838.429	952.386	711.121	1157.97	997.004	1570.11	0.00328922	0.0621253	0
AT1G63670	TRM12	320.804	317.147	313.522	250.592	218.804	199.679	0.00330312	0.0623126	0
AT3G52290	IQD3	263.462	276.438	272.662	441.476	344.72	367.83	0.00330459	0.0623126	0
AT5G43100	NA	221.618	289.692	250.66	370.912	327.174	399.358	0.00330126	0.0623126	0
AT1G53070	NA	337.851	382.469	415.672	294.016	272.473	160.794	0.00330718	0.0623271	0
AT2G41190	NA	41.8439	34.0814	24.3588	45.2332	68.1183	84.0754	0.00331206	0.0623848	0
AT1G19210	NA	261.912	209.222	220.801	194.503	60.8936	100.89	0.00331626	0.0624296	0
AT5G64900	PROPEP1	23.2466	23.6677	34.5738	13.57	14.4493	9.45848	0.00332112	0.0624866	0
AT1G10700	PRS3	193.722	176.087	168.94	253.306	231.189	302.671	0.00332553	0.0625353	0
AT1G54820	NA	199.921	240.463	260.089	281.351	400.453	357.32	0.00333658	0.0627087	0
AT3G52260	NA	122.432	140.112	135.152	84.1338	93.9206	80.9226	0.00336522	0.0632123	0
AT3G62150	ABCB21	34.0951	51.1221	10.215	85.0384	43.348	177.609	0.00336855	0.0632401	0
AT1G53060	NA	89.887	60.5892	40.86	121.225	88.7602	154.489	0.00337855	0.0633117	0
AT1G75370	NA	255.713	270.758	223.944	334.726	313.757	471.873	0.00337872	0.0633117	0
AT4G23200	CRK12	1.54978	2.84012	1.57154	9.04664	10.3209	6.30566	0.0033756	0.0633117	0
AT5G44000	NA	212.319	252.771	252.232	324.774	338.527	352.066	0.00337975	0.0633117	0
AT5G54280	ATM2	573.417	481.873	505.249	698.401	625.449	973.173	0.00338773	0.0634265	0
AT2G37610	NA	3.09955	3.78682	3.14308	0	0	0	0.00341073	0.0638223	0
AT1G64370	NA	0	0	0	3.61866	3.09628	3.15283	0.00341459	0.0638246	0
AT5G22330	RIN1	587.365	668.374	743.337	468.616	522.24	429.836	0.00341298	0.0638246	0
AT4G18210	PUP10	29.4457	44.4952	23.5731	71.4685	83.5997	44.1396	0.00341887	0.0638698	0
AT2G45430	AHL22	1.54978	0	0	9.95131	3.09628	4.20377	0.00342875	0.0639498	0
AT3G30730	NA	6.1991	1.89341	0.785769	11.7606	11.353	7.3566	0.00342675	0.0639498	0
AT5G52547	NA	54.2422	34.0814	42.4315	20.8073	27.8666	16.8151	0.00342831	0.0639498	0
AT5G35170	NA	647.806	768.725	722.907	953.516	973.265	1012.06	0.00343438	0.06402	0
AT1G05910	NA	706.698	811.327	763.767	476.758	649.188	470.822	0.00343708	0.0640355	0
AT3G61650	TUBG1	455.634	477.14	516.25	343.772	380.843	308.977	0.00345716	0.0643395	0
AT5G13700	PAO1	48.043	51.1221	76.2196	36.1866	33.027	25.2226	0.00345711	0.0643395	0
AT1G30530	UGT78D1	774.888	803.753	1118.15	505.707	753.429	523.369	0.00347181	0.0645771	0
AT2G06025	NA	235.566	234.783	256.946	330.202	347.816	339.454	0.00347946	0.0646843	0
AT4G36860	NA	172.025	178.927	185.441	230.689	238.414	336.302	0.0034829	0.0647131	0
AT4G29310	NA	158.077	82.3634	113.151	217.119	157.911	211.239	0.0034987	0.0649715	0
AT1G05490	chr31	15.4978	21.7742	11.0008	4.52332	9.28885	3.15283	0.00351122	0.0651688	0
AT2G27840	HDT4	464.933	562.343	695.405	410.718	435.544	242.768	0.00352943	0.0654359	0
AT5G64040	PSAN	6898.05	4351.06	5516.88	7056.38	8850.21	8716.52	0.00352776	0.0654359	0
AT4G29180	RHS16	1.54978	10.4138	3.14308	0	1.03209	0	0.003541	0.0656148	0
AT4G29730	NFC5	223.168	207.329	254.589	142.032	183.713	126.113	0.00354859	0.0657199	0
AT1G74088	NA	9.29865	20.8275	14.9296	53.3752	25.8024	28.3754	0.00356292	0.0659497	0
AT1G07380	NA	92.9865	62.4826	55.0038	124.844	98.049	134.521	0.00357117	0.0660667	0
AT3G10405	NA	268.111	220.583	208.229	354.628	273.505	409.868	0.00359401	0.0664533	0
AT1G30220	INT2	23.2466	20.8275	7.07192	4.52332	0	7.3566	0.003605	0.0665846	0
AT4G16860	RPP4	238.201	427.542	115.508	522.172	474.619	517.715	0.0036036	0.0665846	0
AT5G66860	NA	533.123	515.008	627.829	429.716	392.196	377.288	0.0036082	0.0666079	0
AT2G26650	KT1	60.4413	81.4167	66.7904	120.32	85.6639	163.947	0.00361876	0.0667668	0
AT1G12020	NA	80.5883	80.47	88.7919	134.795	119.723	131.368	0.00362174	0.0667857	0
AT5G09660	PMDH2	2332.41	1968.2	2116.08	2751.99	2957.98	3052.99	0.00362724	0.0668489	0
AT5G19220	APL1	1425.79	1413.43	1184.15	1748.72	2004.33	1798.16	0.00362906	0.0668489	0
AT4G00150	HAM3	80.5883	80.47	106.865	142.032	116.627	184.966	0.00363655	0.0669508	0
AT5G57735	NA	1.54978	3.78682	4.71461	0	0	0	0.00363855	0.0669517	0
AT1G68585	NA	40.2942	30.2946	24.3588	59.7078	44.3801	79.8716	0.0036518	0.0671528	0
AT4G01990	NA	151.878	135.379	157.94	94.0851	111.466	83.0245	0.0036534	0.0671528	0
AT4G15790	NA	647.806	532.995	601.899	460.474	448.961	304.773	0.00365746	0.0671913	0
AT3G54560	HTA11	2045.7	1769.39	1996.64	1546.98	1354.11	1329.44	0.00367854	0.0675424	0
AT3G06120	MUTE	30.9955	17.0407	23.5731	39.8052	71.2145	38.8849	0.00368825	0.067589	0
AT3G27190	UKL2	114.683	113.605	142.224	74.1825	47.4764	92.4829	0.00368855	0.067589	0
AT4G34950	NA	353.349	384.363	109.222	544.608	420.063	766.137	0.00368912	0.067589	0
AT4G37290	NA	3.09955	10.4138	3.92884	26.2353	11.353	14.7132	0.00369094	0.067589	0
AT5G05920	DHS	147.229	182.714	161.868	113.988	114.563	95.6358	0.003687	0.067589	0
AT1G76020	NA	52.6924	39.7617	29.8592	57.8985	84.6318	78.8207	0.00370747	0.0678421	0
AT4G26260	MIOX4	34.0951	33.1347	29.8592	33.4726	29.9308	376.237	0.00370872	0.0678421	0
AT4G37490	CYCB1;1	711.347	564.237	638.83	485.805	476.828	390.951	0.00373346	0.0682581	0
AT5G35732	NA	1.54978	0	0	7.23731	3.09628	6.30566	0.0037462	0.0684545	0
AT3G52535	NA	1.54978	1.89341	1.57154	4.52332	8.25676	10.5094	0.00375897	0.0686514	0
AT3G12780	PGK1	6420.72	6449.91	6007.2	7634.46	8947.23	9212.56	0.00377004	0.0688167	0
AT5G03630	ATMDAR2	808.983	636.186	641.973	511.135	494.373	486.586	0.00377204	0.0688167	0
AT3G21890	BBX31	6.1991	2.84012	7.07192	0.904664	0	1.05094	0.00377599	0.0688521	0
AT4G32870	NA	23.2466	17.9874	31.4308	7.23731	8.25676	15.7641	0.00378309	0.0689448	0
AT1G11050	NA	323.903	337.027	364.597	294.921	195.066	199.679	0.0037911	0.0690021	0
AT4G00200	NA	137.93	132.539	145.367	102.227	77.4071	90.3811	0.00379097	0.0690021	0
AT5G18120	APRL7	92.9865	89.9371	104.507	143.842	149.654	141.877	0.00379227	0.0690021	0
AT2G03750	NA	260.362	223.423	265.59	311.205	437.608	342.607	0.00380866	0.0692329	0
AT5G13680	ABO1	864.775	967.534	1027.79	637.788	769.943	657.89	0.003809	0.0692329	0
AT3G23250	MYB15	57.3417	53.0155	42.4315	30.7586	24.7703	28.3754	0.00381198	0.0692502	0
AT4G37895	NA	0	0.946706	0	7.23731	1.03209	6.30566	0.00382182	0.0693923	0
AT3G56230	NA	0	0	0	5.42799	5.16047	0	0.00382543	0.069421	0
AT3G59890	NA	282.059	303.893	357.525	200.835	236.35	223.851	0.00383309	0.0695232	0
AT3G05650	RLP32	9.29865	8.52035	3.14308	16.284	36.1233	11.5604	0.00383869	0.0695879	0
AT5G38865	NA	23.2466	15.1473	15.7154	20.8073	42.3159	81.9735	0.00384088	0.0695909	0
AT1G60770	NA	754.741	832.155	827.415	570.843	577.973	621.107	0.00384566	0.0696405	0
AT3G18850	LPAT5	116.233	124.965	120.223	200.835	175.456	161.845	0.00387378	0.0701128	0
AT5G47840	AMK2	757.84	639.973	656.903	880.238	904.115	1064.6	0.00387639	0.0701229	0
AT1G80400	NA	141.03	140.112	142.224	204.454	177.52	256.43	0.00388365	0.0701887	0
AT2G24590	RSZ22a	1228.97	1039.48	1192.8	873.906	884.505	749.322	0.00388412	0.0701887	0
AT1G04020	BARD1	344.05	576.544	443.959	299.444	345.752	154.489	0.00388812	0.070224	0
AT1G12000	NA	2815.94	2909.23	3922.56	1993.88	2690.67	1884.34	0.00389206	0.070258	0
AT1G23052	NA	0	0.946706	0.785769	2.71399	3.09628	13.6623	0.00389846	0.0703365	0
AT1G73500	MKK9	714.447	746.951	840.773	658.596	414.902	505.503	0.00390096	0.0703446	0
AT3G17840	RLK902	1038.35	1151.19	1562.89	813.293	1025.9	595.884	0.00392485	0.0706636	0
AT4G14540	NF-YB3	199.921	158.1	210.586	289.493	242.542	300.57	0.0039241	0.0706636	0
AT4G24960	HVA22D	392.093	445.899	421.172	322.965	319.949	192.322	0.0039269	0.0706636	0
AT5G54080	HGO	105.385	72.8964	91.1492	110.369	121.787	345.76	0.00392293	0.0706636	0
AT5G58590	RANBP1	660.204	543.409	706.406	501.184	451.025	393.053	0.00393526	0.0707563	0
AT5G61000	RPA70D	447.885	760.205	621.543	400.766	468.571	215.443	0.00393618	0.0707563	0
AT1G68500	NA	38.7444	13.2539	14.9296	45.2332	36.1233	91.432	0.00394027	0.0707926	0
AT2G26310	FAP2	23.2466	16.094	27.5019	4.52332	8.25676	13.6623	0.00395209	0.0708564	0
AT3G10060	NA	447.885	414.657	425.887	590.746	573.845	596.935	0.00395072	0.0708564	0
AT3G51325	NA	0	0	0	11.7606	1.03209	1.05094	0.00394938	0.0708564	0
AT5G41810	NA	209.22	244.25	245.946	315.728	335.431	333.149	0.00395043	0.0708564	0
AT1G26330	NA	181.324	202.595	158.725	107.655	145.525	88.2792	0.00396003	0.0709119	0
AT1G30260	NA	1.54978	0	3.92884	14.4746	6.19257	6.30566	0.00396554	0.0709119	0
AT2G20570	GPRI1	858.576	802.807	788.912	1023.18	1153.88	1160.24	0.00396449	0.0709119	0
AT3G07460	NA	257.263	223.423	265.59	496.661	337.495	298.468	0.00396316	0.0709119	0
AT3G56140	NA	499.028	471.46	470.676	626.028	558.363	1068.81	0.00396216	0.0709119	0
AT1G19300	PARVUS	51.1426	68.1628	33.7881	87.7524	98.049	86.1773	0.00397638	0.0710688	0
AT3G07050	NSN1	1453.69	1756.14	1898.42	1226.72	1288.05	1178.11	0.0039807	0.0711089	0
AT2G38860	YLS5	167.376	106.978	152.439	75.9918	103.209	79.8716	0.00398316	0.0711157	0
AT3G24495	MSH7	402.942	568.024	507.607	339.249	394.26	210.189	0.00399134	0.0712247	0
AT5G46740	UBP21	244.865	495.127	369.311	244.259	264.216	146.081	0.00401937	0.0716875	0
AT5G37010	NA	751.641	899.371	832.915	612.458	617.193	585.375	0.00402594	0.0717673	0
AT2G37560	ORC2	57.3417	91.8305	88.7919	33.4726	58.8294	17.866	0.00403103	0.0717834	0
AT4G29950	NA	254.163	268.865	267.947	326.584	309.628	789.258	0.00403007	0.0717834	0
AT3G13160	NA	461.833	484.713	431.387	371.817	335.431	246.972	0.00403765	0.0718639	0
AT4G18800	RABA1d	127.082	103.191	103.721	70.5638	79.4713	54.649	0.00405223	0.072086	0
AT5G23010	MAM1	1.54978	2.84012	4.71461	24.4259	13.4172	3.15283	0.00406315	0.0722428	0
AT4G03280	PETC	5754.32	4914.35	4911.06	6554.29	7160.67	7580.45	0.00406732	0.0722793	0
AT4G16447	NA	44.9435	35.9748	29.0734	50.6612	61.9257	102.992	0.00407455	0.0723703	0
AT3G19380	PUB25	26.3462	39.7617	25.1446	70.5638	41.2838	64.1075	0.00408775	0.0724925	0
AT3G25060	NA	27.896	27.4545	20.43	8.14198	15.4814	10.5094	0.00408877	0.0724925	0
AT5G14410	NA	103.835	96.564	100.578	172.791	118.691	184.966	0.00408451	0.0724925	0
AT5G53400	BOB1	804.334	600.212	794.412	584.413	502.63	447.702	0.0040899	0.0724925	0
AT1G30250	NA	6.1991	0	0	9.95131	5.16047	14.7132	0.00410733	0.072755	0
AT3G54690	SETH3	283.609	307.679	280.519	362.77	427.287	424.581	0.00410895	0.072755	0
AT1G23800	ALDH2B7	1.54978	2.84012	3.14308	18.998	6.19257	7.3566	0.00413147	0.0730028	0
AT1G68100	IAR1	150.328	140.112	159.511	200.835	202.291	270.092	0.00412572	0.0730028	0
AT3G44820	NA	15.4978	18.9341	18.8585	38.9006	37.1554	28.3754	0.00412927	0.0730028	0
AT3G60160	ABCC9	9.29865	31.2413	22.7873	0.904664	12.3851	4.20377	0.00413075	0.0730028	0
AT2G32080	PUR ALPHA-1	376.596	309.573	256.946	462.283	396.324	506.554	0.00414903	0.0732375	0
AT4G13500	NA	263.462	282.118	237.302	404.385	342.655	352.066	0.00414881	0.0732375	0
AT2G37330	ALS3	1.54978	1.89341	0.785769	7.23731	6.19257	7.3566	0.00418633	0.0738579	0
AT2G31040	NA	457.184	543.409	349.667	625.123	564.556	854.416	0.00419465	0.0739667	0
AT5G14970	NA	382.795	358.802	311.164	494.851	456.186	512.86	0.00420061	0.0739956	0
AT5G54290	CcdA	378.145	333.241	335.523	479.472	420.063	595.884	0.00419861	0.0739956	0
AT3G60300	NA	309.955	212.062	248.303	394.434	286.922	534.93	0.0042263	0.0744098	0
AT1G53670	MSRB1	193.722	152.42	179.941	231.594	241.51	295.315	0.00423281	0.0744862	0
AT1G22180	NA	15.4978	22.7209	16.5011	42.5192	29.9308	35.732	0.00423577	0.0745	0
AT4G01770	RGXT1	0	0	0.785769	5.42799	5.16047	2.10189	0.00424086	0.0745512	0
AT1G64020	NA	0	0	0	6.33265	0	4.20377	0.0042549	0.0747597	0
AT2G04400	NA	440.136	432.645	435.316	325.679	340.591	278.5	0.00425861	0.0747864	0
AT5G27120	NA	1656.71	2218.13	2621.32	1604.87	1608	1148.68	0.00426812	0.0749152	0
AT4G05330	AGD13	187.523	130.645	110.008	256.925	170.296	270.092	0.00428304	0.0751386	0
AT5G06470	NA	0	0	0	5.42799	1.03209	3.15283	0.00428567	0.0751462	0
AT1G15550	GA3OX1	20.1471	16.094	18.0727	30.7586	53.6689	28.3754	0.00429842	0.0753205	0
AT5G59290	UXS3	497.478	347.441	405.457	532.847	640.931	609.547	0.00430001	0.0753205	0
AT2G30660	NA	3.09955	6.62694	3.14308	0.904664	0	0	0.00430766	0.075416	0
AT4G34910	NA	340.951	407.084	449.46	247.878	327.174	257.481	0.0043144	0.0754953	0
AT1G24350	NA	72.8395	79.5233	61.29	142.937	85.6639	132.419	0.00432572	0.075632	0
AT1G67880	NA	204.57	264.131	288.377	152.888	190.938	169.202	0.00432816	0.075632	0
AT4G11360	RHA1B	83.6879	85.2035	54.218	133.89	91.8564	166.049	0.00432883	0.075632	0
AT5G23155	NA	1.54978	8.52035	5.50038	16.284	15.4814	12.6113	0.00433353	0.0756755	0
AT1G13090	CYP71B28	203.021	147.686	157.154	236.117	262.152	241.717	0.00434081	0.075764	0
AT3G16810	PUM24	495.928	785.766	784.983	412.527	558.363	389.9	0.00434304	0.0757645	0
AT3G46490	NA	0	0	0	9.95131	3.09628	0	0.00435768	0.0759424	0
AT4G26542	NA	13.948	19.8808	14.9296	34.3772	23.7382	44.1396	0.00435623	0.0759424	0
AT3G14190	NA	777.987	791.446	876.918	640.502	628.546	390.951	0.00439186	0.0764991	0
AT1G06700	NA	440.136	460.099	461.246	612.458	558.363	720.947	0.00439767	0.0765309	0
AT3G26520	TIP2	10103	10261.3	9364.01	11984.1	13495.7	15185.1	0.00439815	0.0765309	0
AT4G12130	NA	117.783	122.125	146.153	89.5618	86.696	71.4641	0.00440621	0.0765996	0
AT4G23490	NA	182.874	208.275	232.588	131.176	164.103	121.909	0.00440657	0.0765996	0
AT4G33950	OST1	136.38	145.793	114.722	89.5618	86.696	80.9226	0.00441364	0.0766836	0
AT3G23280	XBAT35	373.496	382.469	299.378	427.906	484.052	623.209	0.00442603	0.0768599	0
AT4G12730	FLA2	452.535	448.739	406.242	818.721	796.777	424.581	0.00443433	0.0769261	0
AT5G10520	RBK1	92.9865	117.392	172.083	65.1358	62.9578	91.432	0.00443257	0.0769261	0
AT1G23200	NA	0	0.946706	0	1.80933	13.4172	2.10189	0.00445579	0.0771811	0
AT2G27190	PAP12	100.735	88.0437	78.5769	170.982	132.108	119.807	0.00445561	0.0771811	0
AT4G35870	NA	94.5363	111.711	91.1492	146.556	158.943	142.928	0.00445393	0.0771811	0
AT4G35720	NA	3.09955	3.78682	0	21.7119	7.22466	5.25471	0.00446127	0.077237	0
AT3G47070	NA	867.874	776.299	712.692	1196.87	1043.45	1002.6	0.0044656	0.077273	0
AT3G28500	NA	29.4457	11.3605	28.2877	8.14198	7.22466	11.5604	0.00448055	0.0774925	0
AT3G54920	PMR6	1734.2	1382.19	1190.44	2354.84	1466.61	3109.74	0.00449075	0.0776023	0
AT5G64530	XND1	29.4457	40.7084	33.7881	18.998	18.5777	16.8151	0.00449143	0.0776023	0
AT5G47710	NA	172.025	192.181	202.728	142.937	124.883	116.655	0.00449844	0.0776842	0
AT3G18960	NA	162.726	159.993	132.795	227.071	179.585	299.519	0.00450486	0.0777331	0
AT4G30690	NA	387.444	363.535	319.022	540.085	382.907	706.233	0.00450581	0.0777331	0
AT3G10520	HB2	246.414	223.423	100.578	372.722	282.794	318.436	0.00451705	0.0778879	0
AT5G52910	ATIM	268.111	332.294	288.377	183.647	247.703	105.094	0.00452159	0.0779269	0
AT1G19660	NA	458.734	316.2	248.303	442.381	440.705	910.116	0.00452651	0.0779333	0
AT1G21880	LYM1	838.429	1065.04	957.066	668.547	760.654	636.871	0.00452638	0.0779333	0
AT1G25580	SOG1	297.557	324.72	281.305	227.071	214.676	202.832	0.00453572	0.0780527	0
AT5G23510	NA	34.0951	41.6551	26.7161	69.6592	40.2517	107.196	0.00454509	0.0781354	0
ATCG01020	RPL32	142.579	105.084	101.364	192.693	149.654	196.526	0.00454287	0.0781354	0
AT1G54780	TLP18.3	2543.18	2294.82	2239.44	2971.82	3298.58	3298.91	0.00455179	0.0781721	0
AT2G29550	TUB7	5974.39	6606.11	7003.56	4807.39	5379.28	3472.31	0.00455096	0.0781721	0
AT3G55340	PHIP1	373.496	442.112	452.603	334.726	313.757	203.883	0.00456675	0.0783897	0
AT5G20160	NA	1053.85	1300.77	1469.39	937.232	992.875	765.086	0.00457707	0.0785276	0
AT2G30600	NA	1526.53	1754.25	1450.53	2195.62	1612.13	4642.01	0.00458207	0.0785347	0
[truncated: 32,264 more rows]

## Sheet: TableS2
Table S2:	Common DEGs among 5 DAS leaf primordia (WT and an3; this study), WT transition phase (day 9 and day 10; Andriankaja et al. 2012), and AN3-induced leaves (AN3-induced and control; Vercruyssen et al. 2014).
GeneID	Description	an3/WT	d10/d9	AN3-induced /control
AT5G42060	DEK, chromatin associated protein	0.55	down	up
AT3G22660 (EBP2)	rRNA processing protein-like protein	0.66	down	up
AT1G79150	Binding protein presumably required for synthesis of 60S ribosomal subunits and for initiation of DNA replication	0.66	down	up
AT4G25340	FK506 binding protein 53	0.64	down	up
AT1G14060	GCK domain-containing protein	0.62	down	up
AT5G55920 (OLI2)	A homolog protein of the S. cerevisiae Nop2 involved in ribosome biogenesis	0.65	down	up
AT5G09420	One of the 36 carboxylate clamp (CC)-tetratricopeptide repeat (TPR) proteins	0.58	down	up
AT5G14580	A putative polyribonucleotide nucleotidyl transferase	0.62	down	up
AT3G29240	PPR containing protein (DUF179)	1.71	up	down
AT1G68570 (NPF3)	A membrane localized GA transporter	2.05	up	down
AT3G55710	UDP-glycosyltransferase superfamily protein	2.51	up	down
AT5G55450 (LTP4.4)	Bifunctional inhibitor/lipid-transfer protein/seed storage 2S albumin superfamily protein	3.44	up	down
AT5G24530 (DMR6)	A putative 2-oxoglutarate (2OG) and Fe(II)-dependent oxygenase superfamily protein	2.74	up	down
AT2G41090 (CML10)	Encodes a cytoplasmic, calcium binding calmodulin variant.	1.72	up	down
